# Supplementary material
Source: PubMed Central journal article supplement (PMC3243571)
Supplement: supp_mcm044_mcm044_supp_Figs.pdf [file supp_mcm044_mcm044_supp_Figs.pdf]

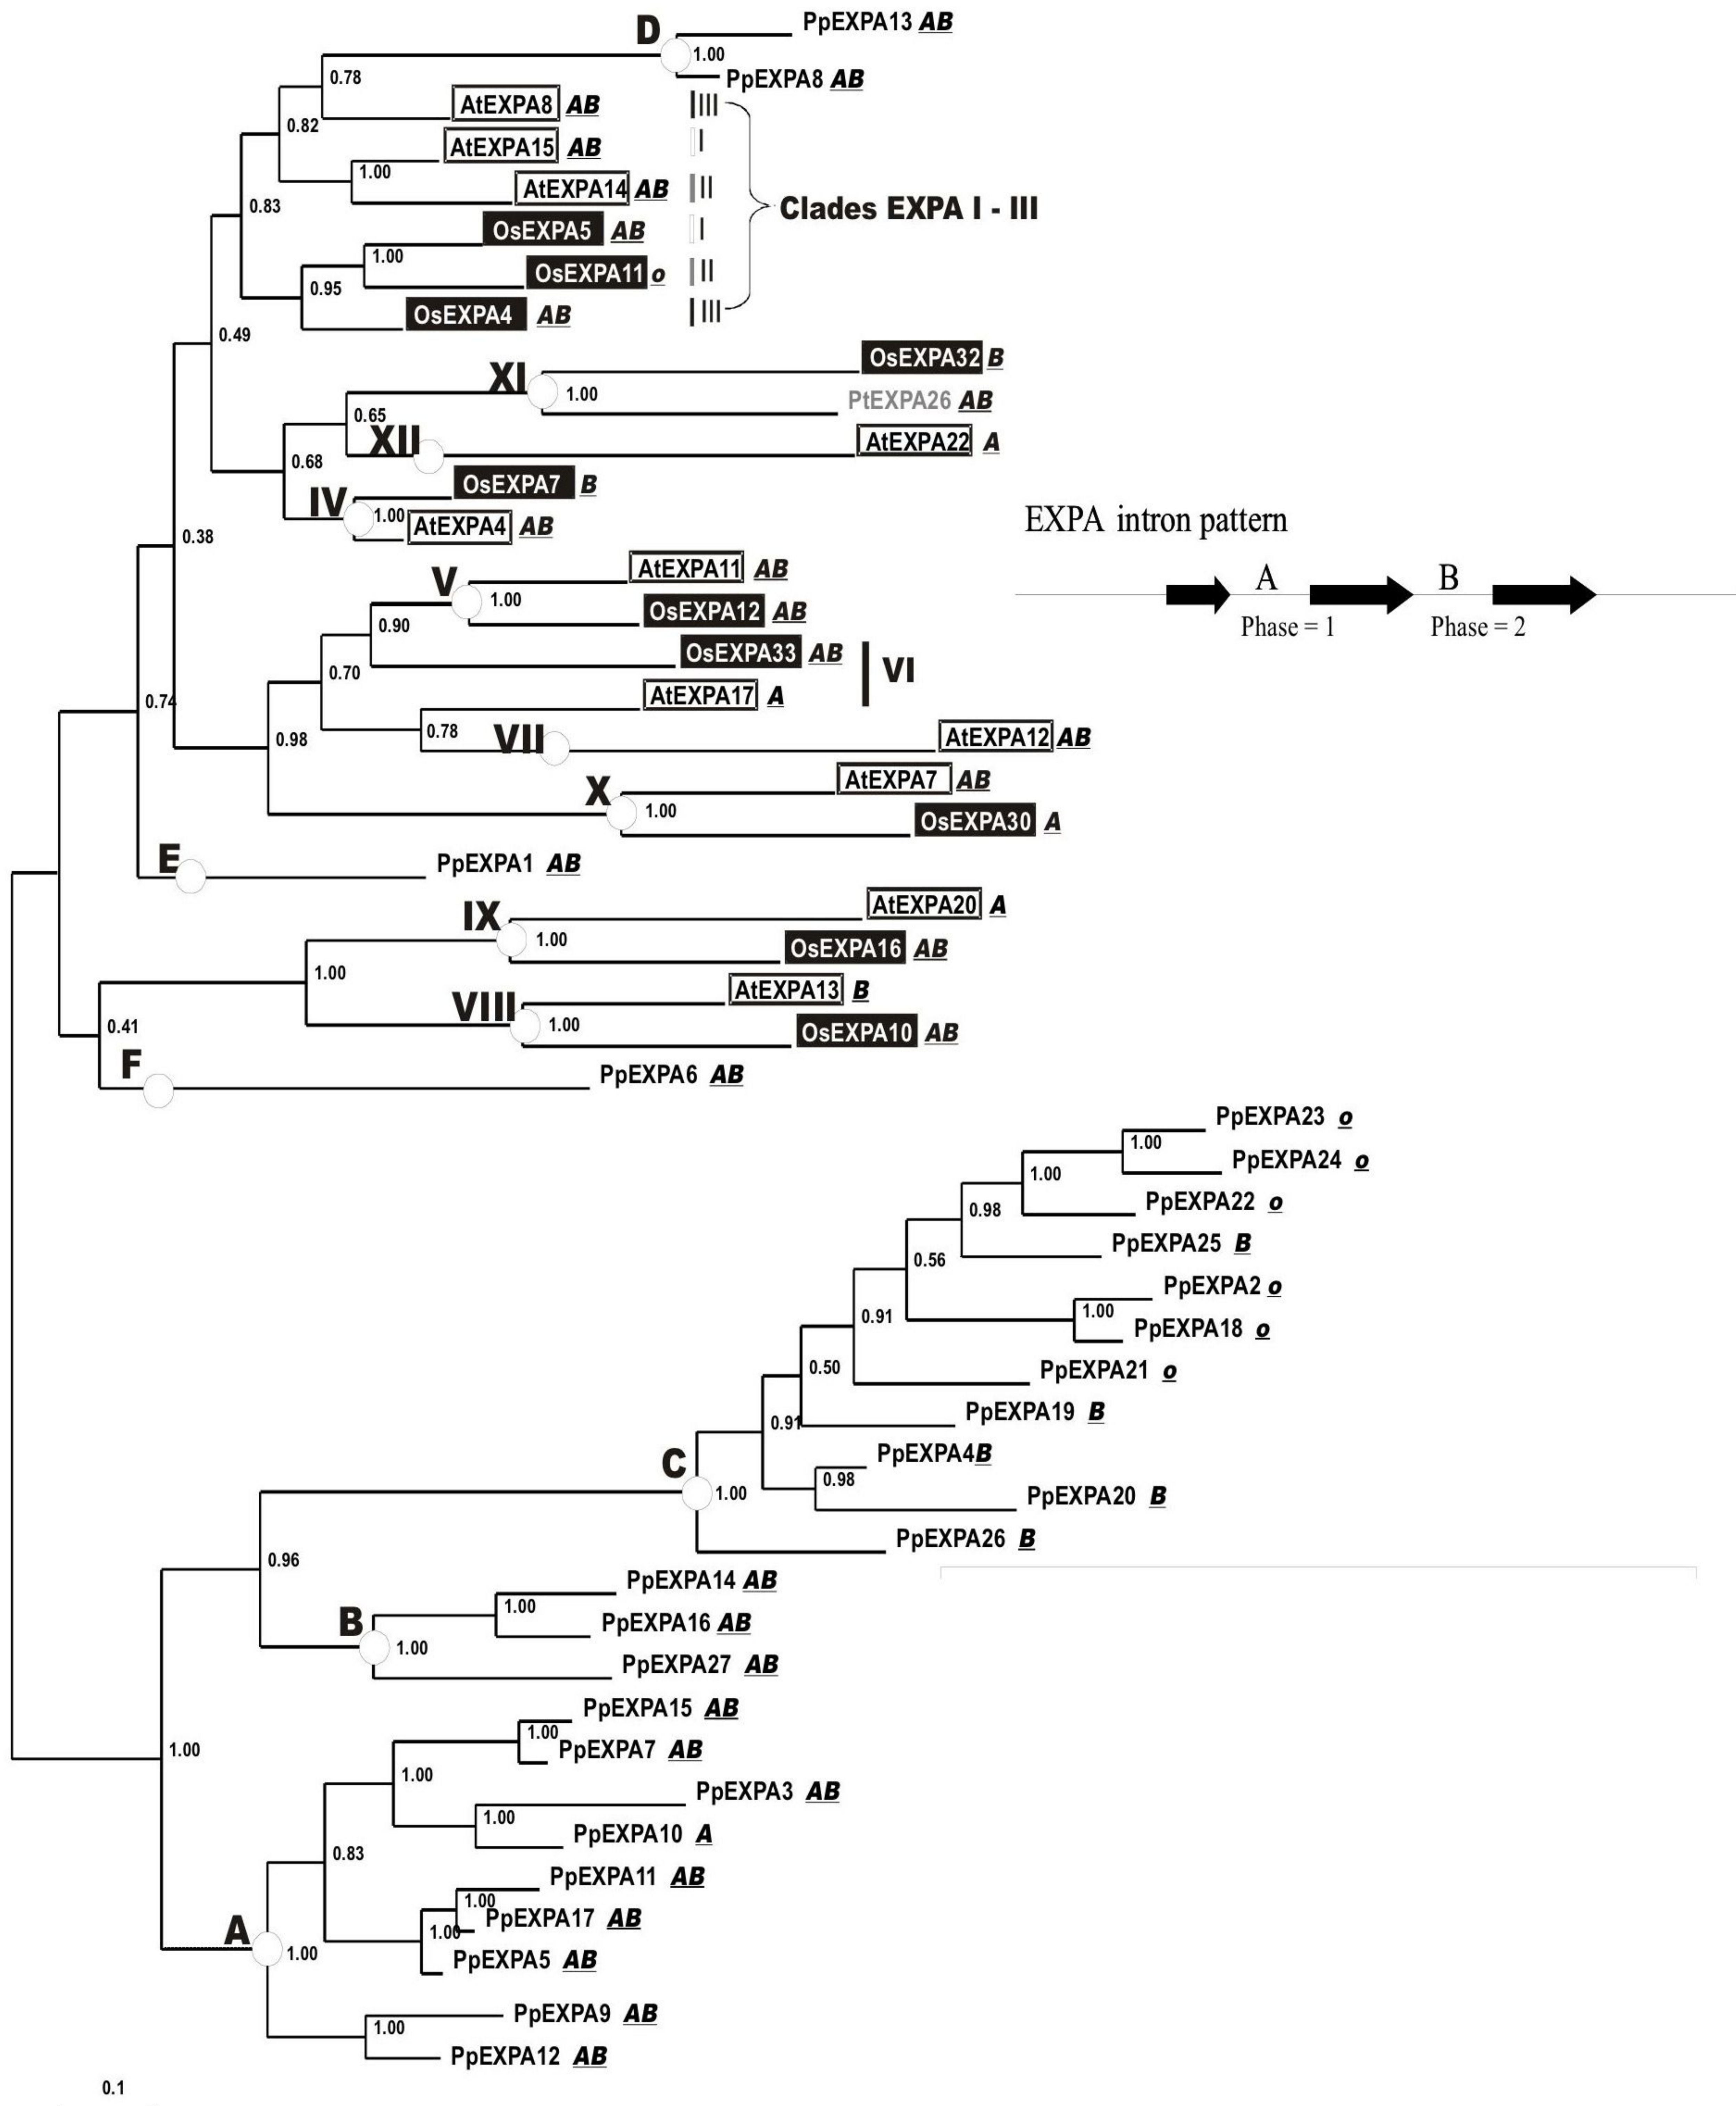

Fig. 1 – EXPA Bayesian tree and intron patterns



EXPB intron pattern

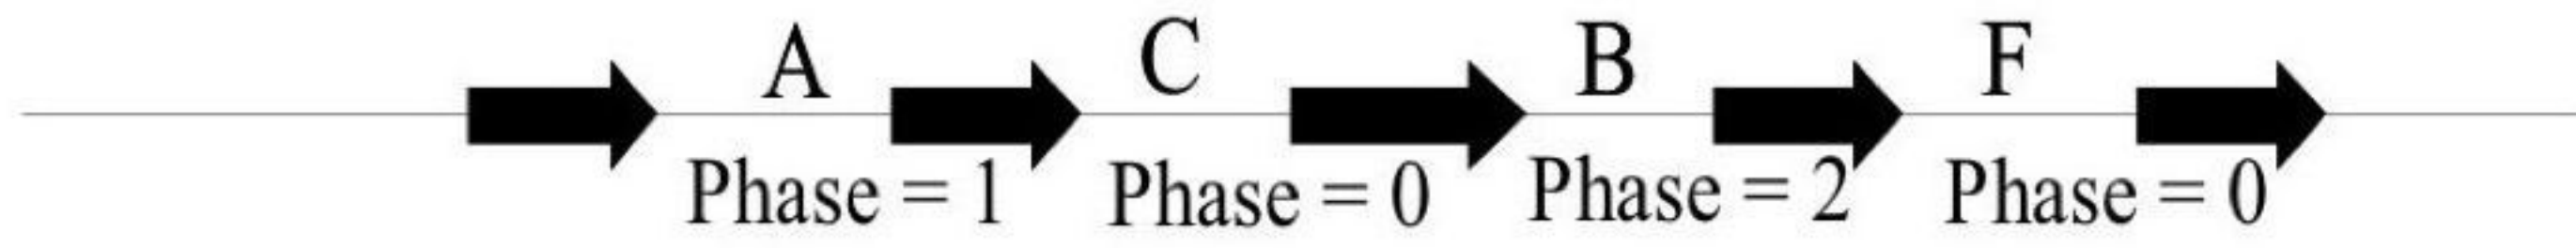

# EXPB

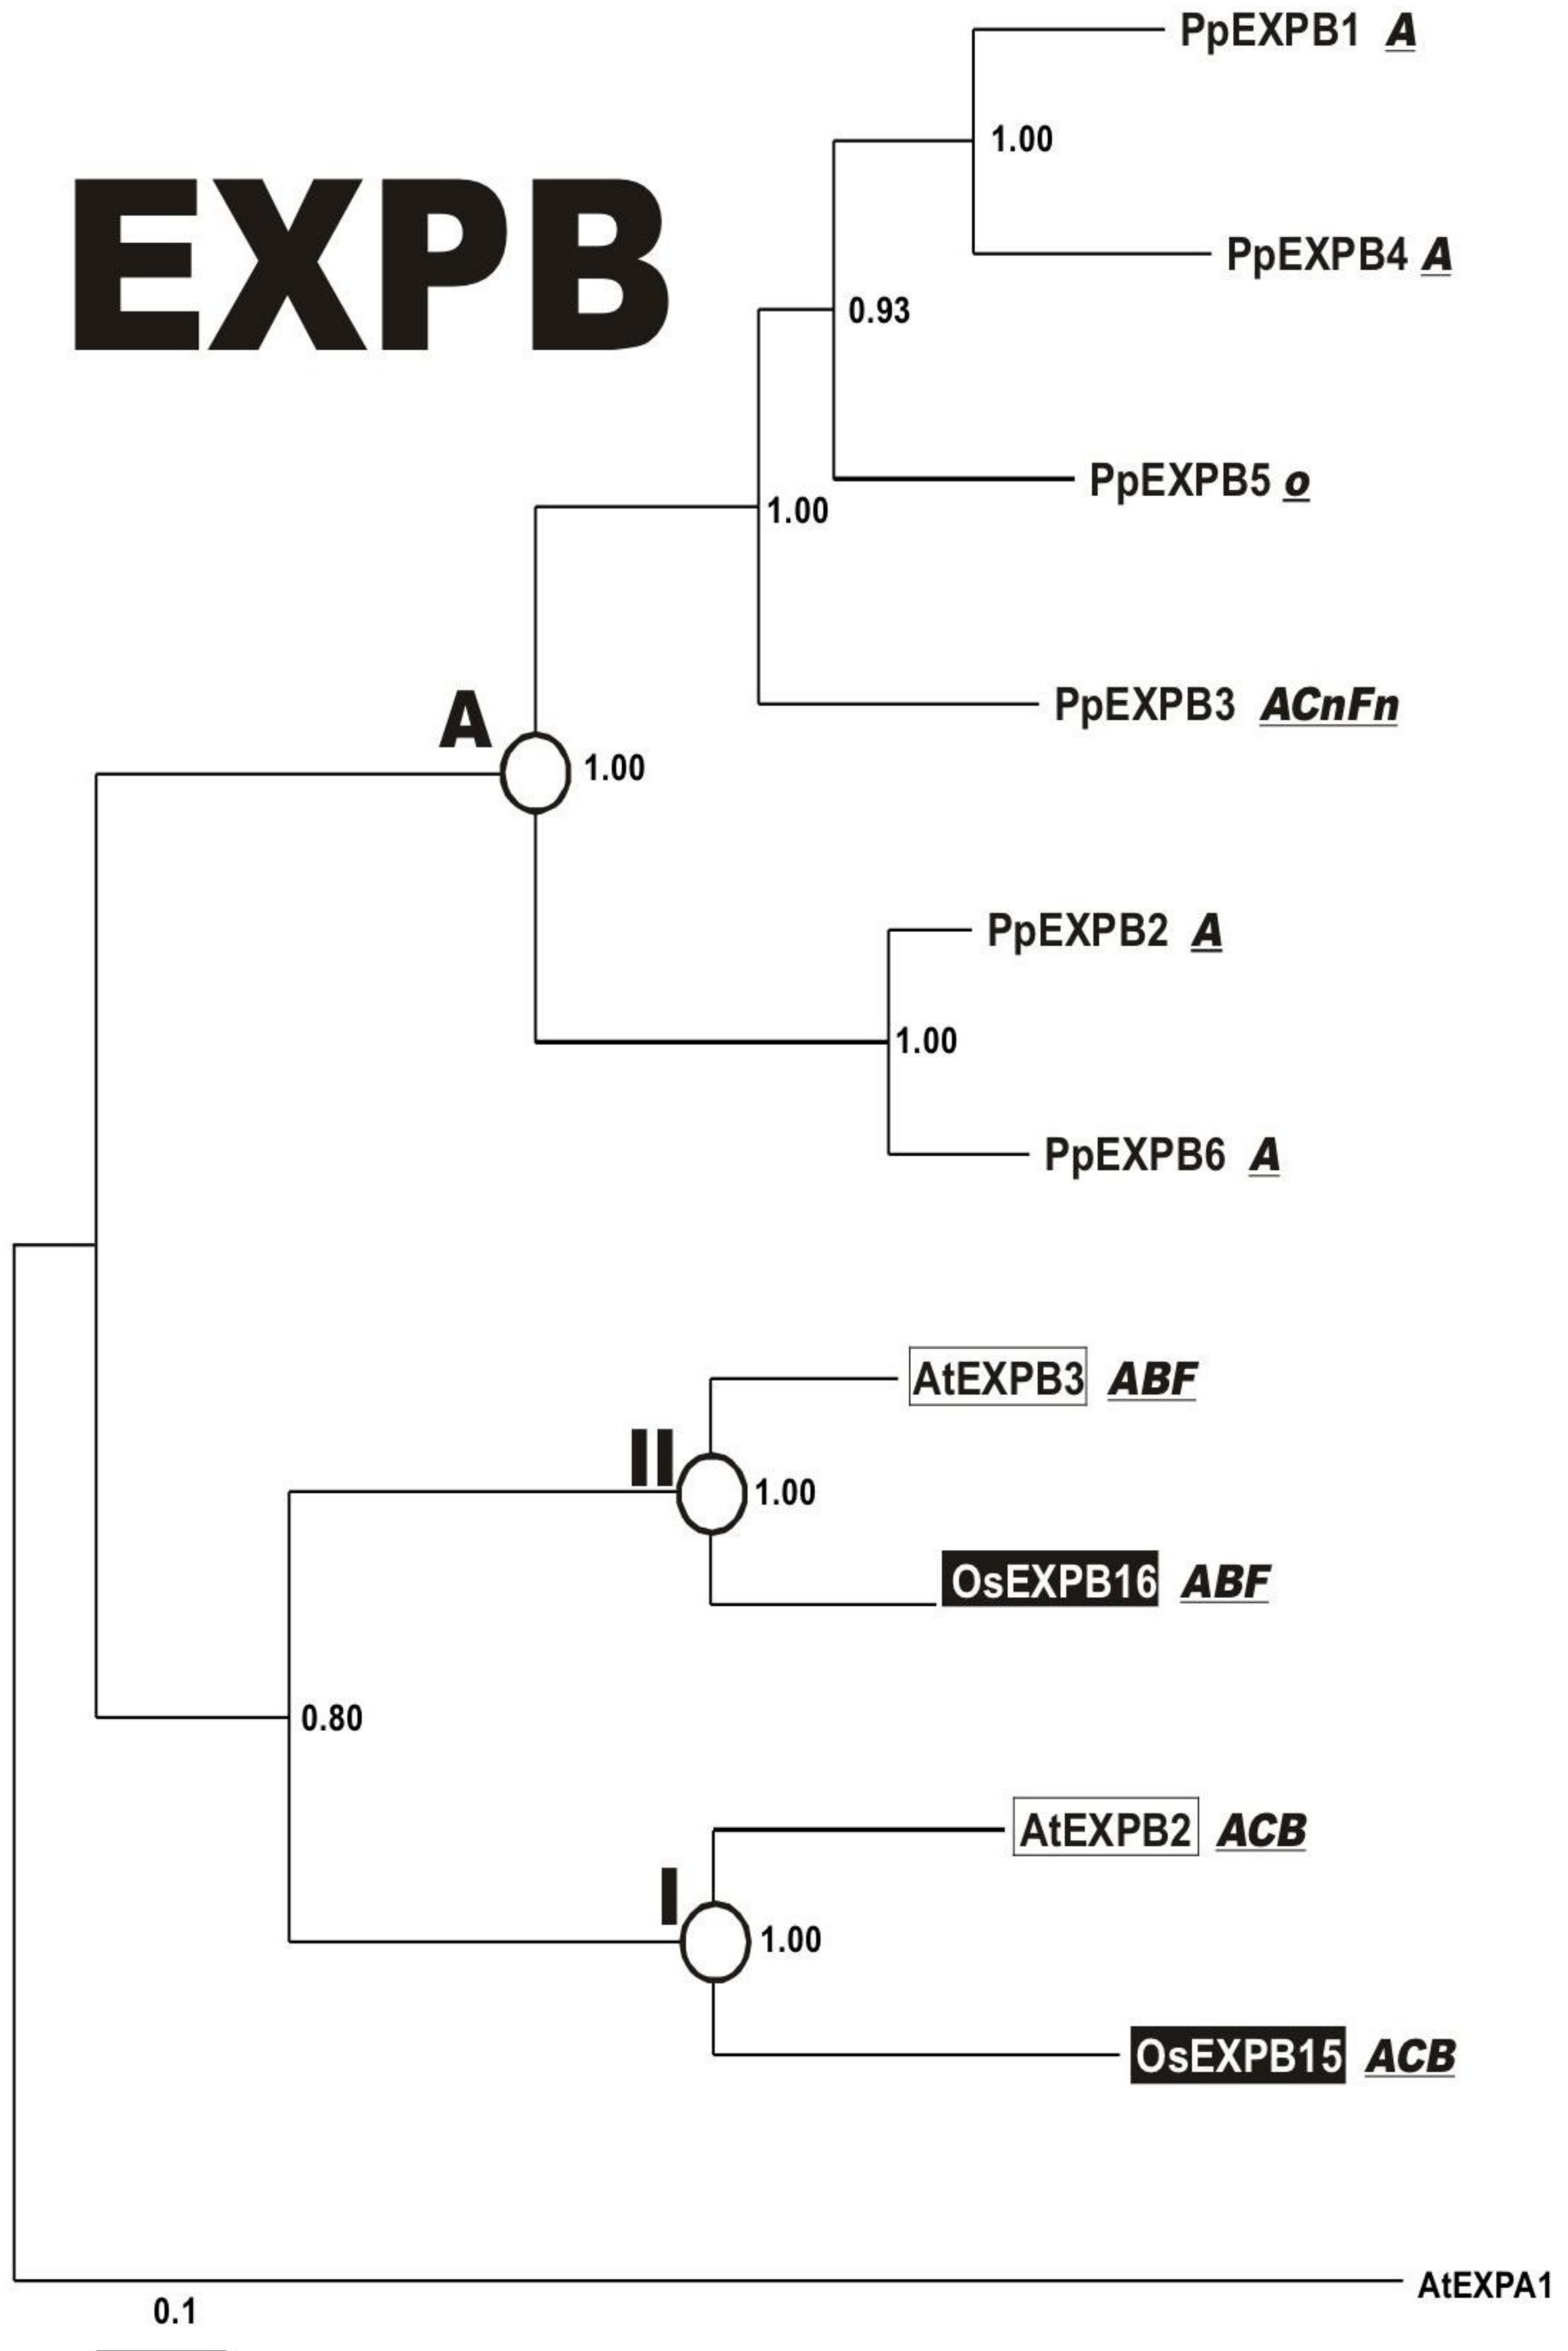

Fig. 3 – Bayesian EXPB tree.

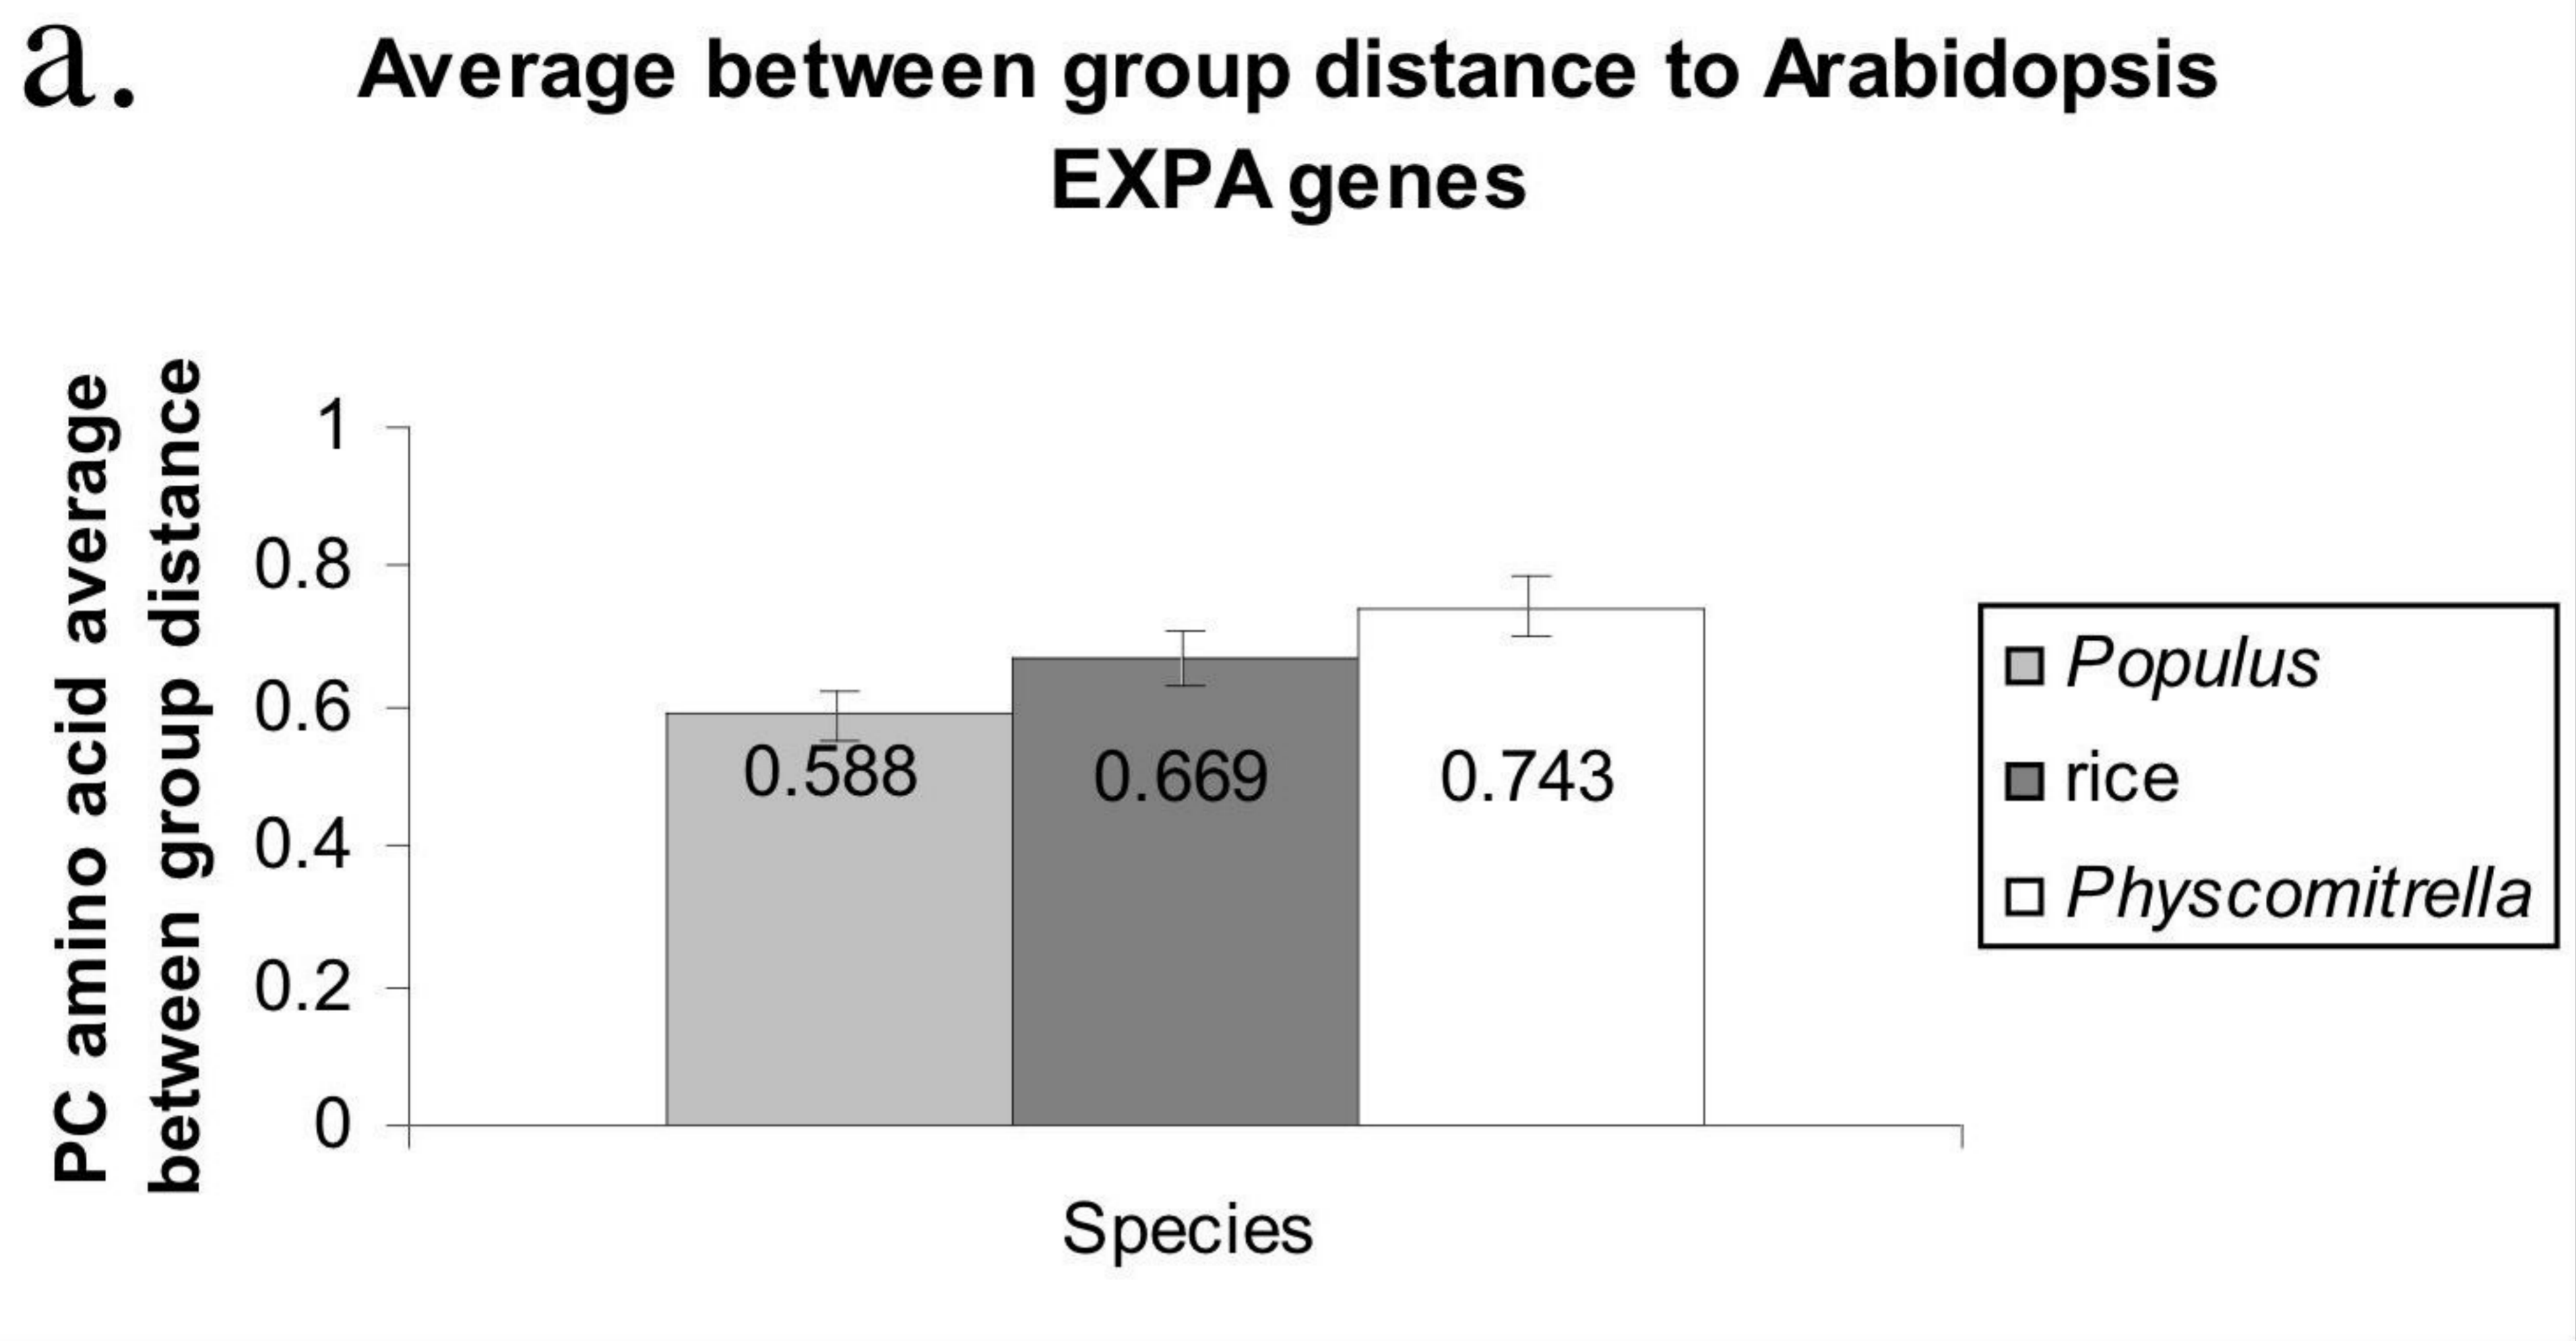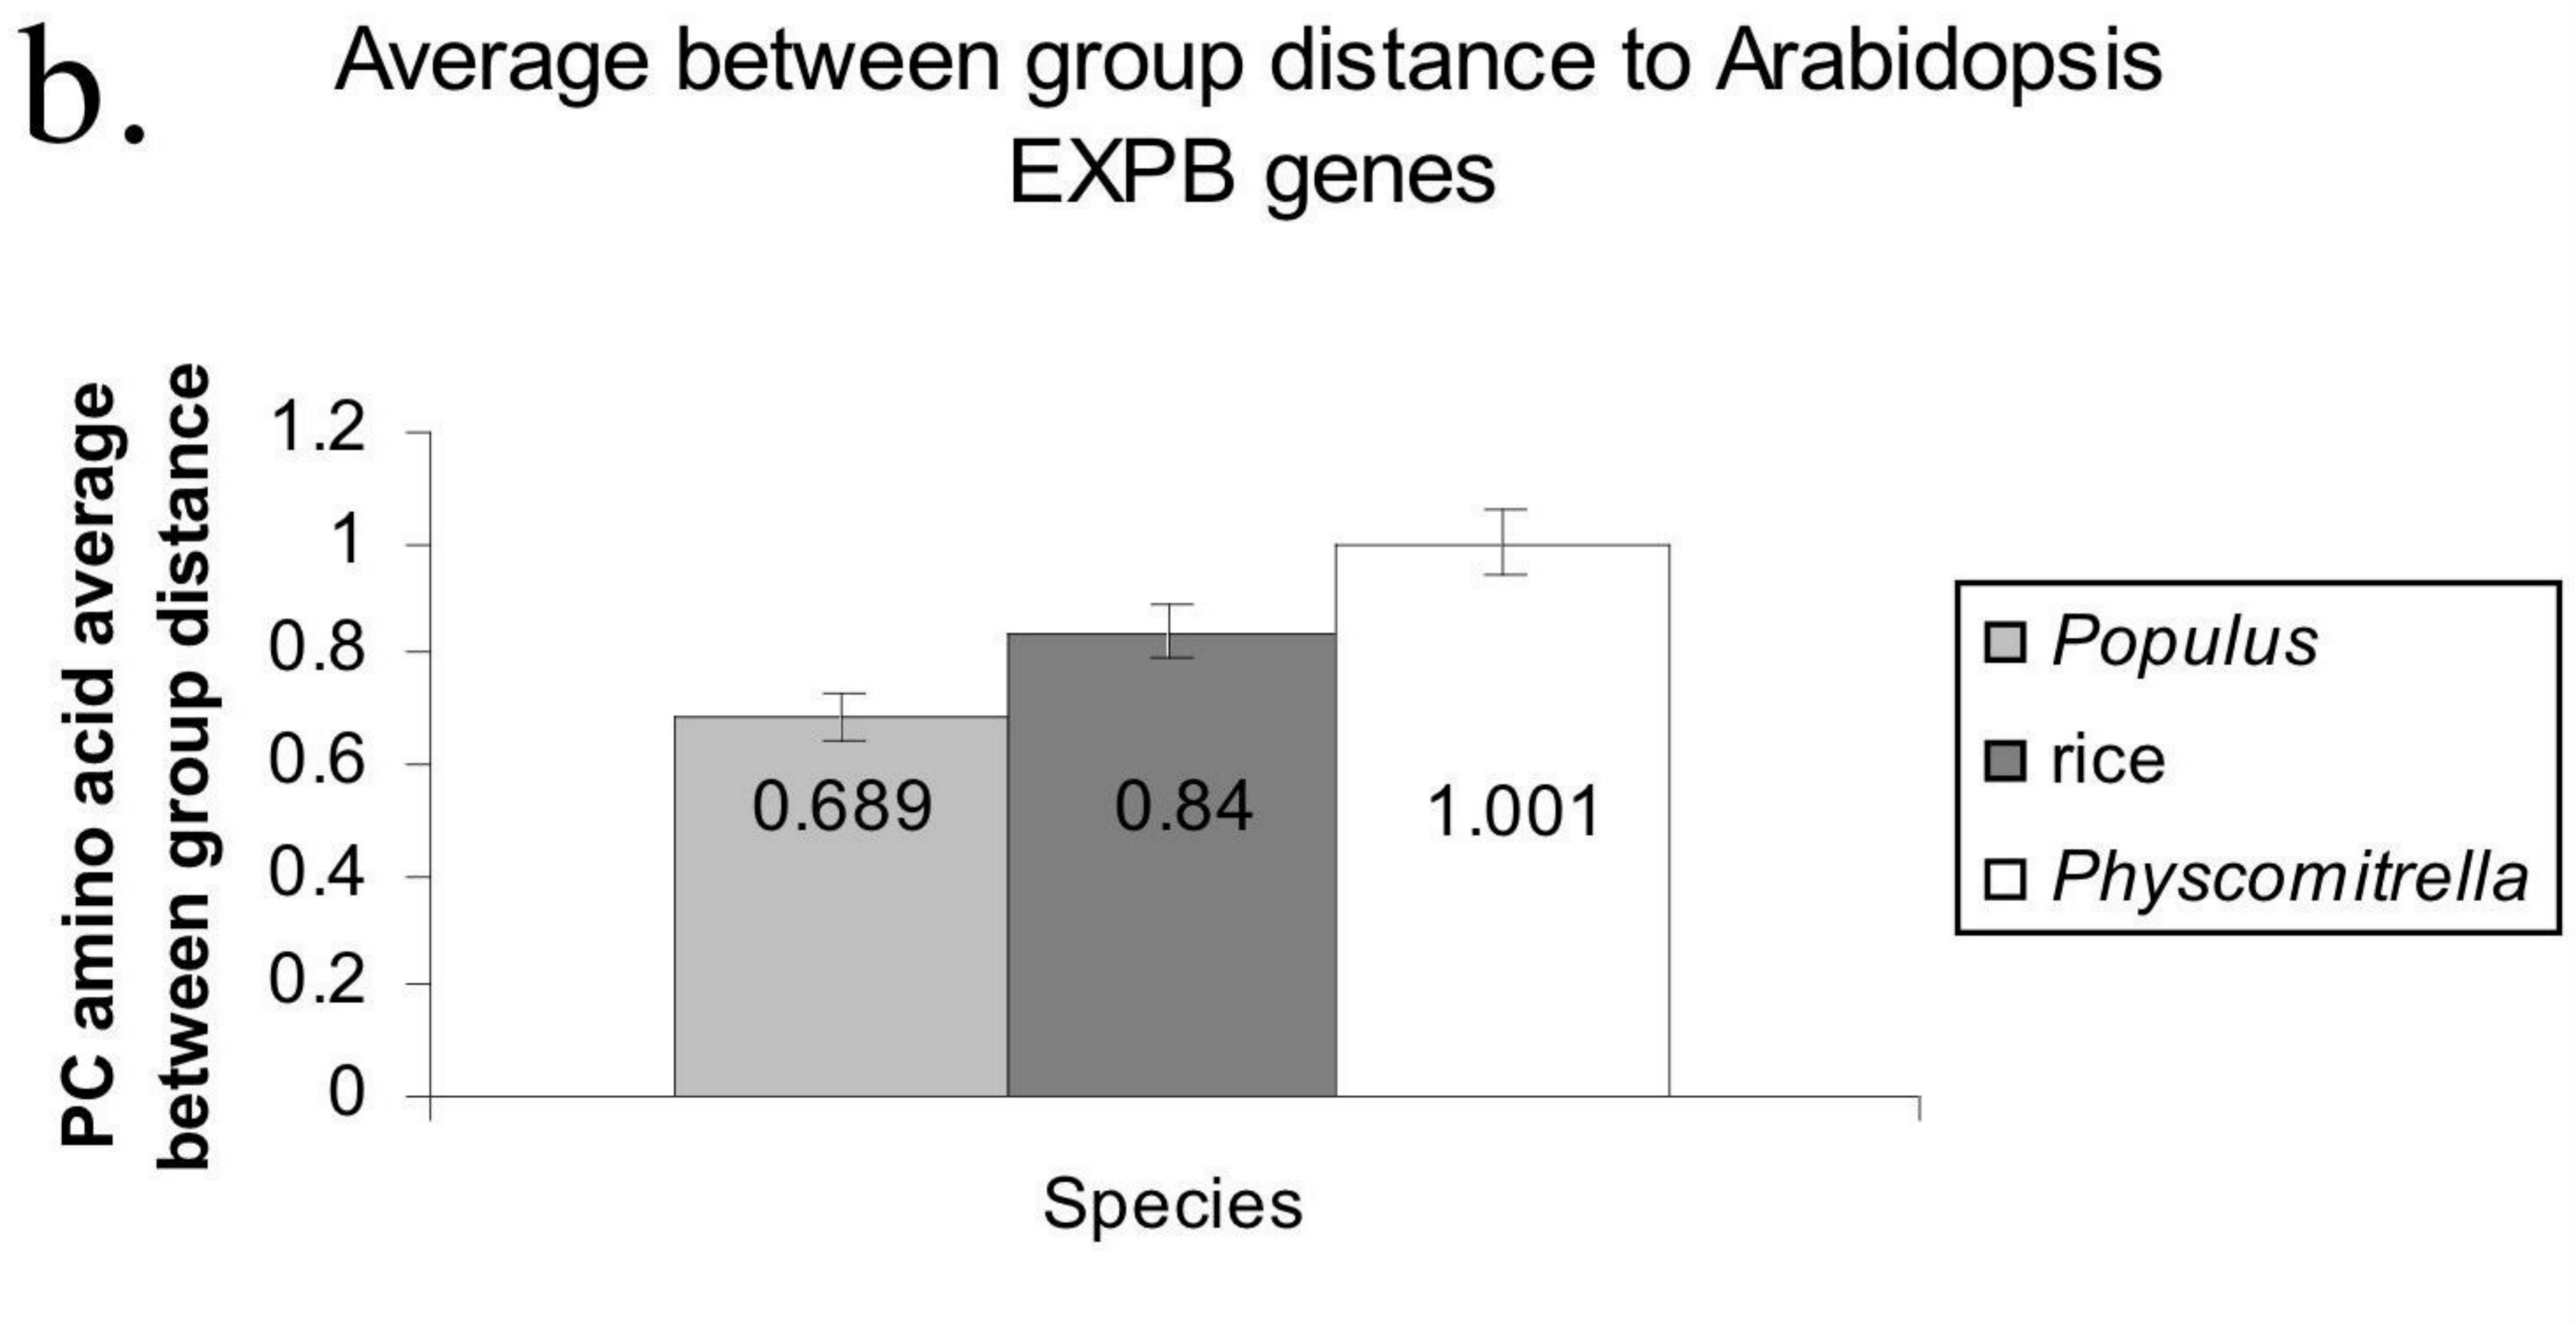

Fig. 4a,b – Average between group amino acid distances

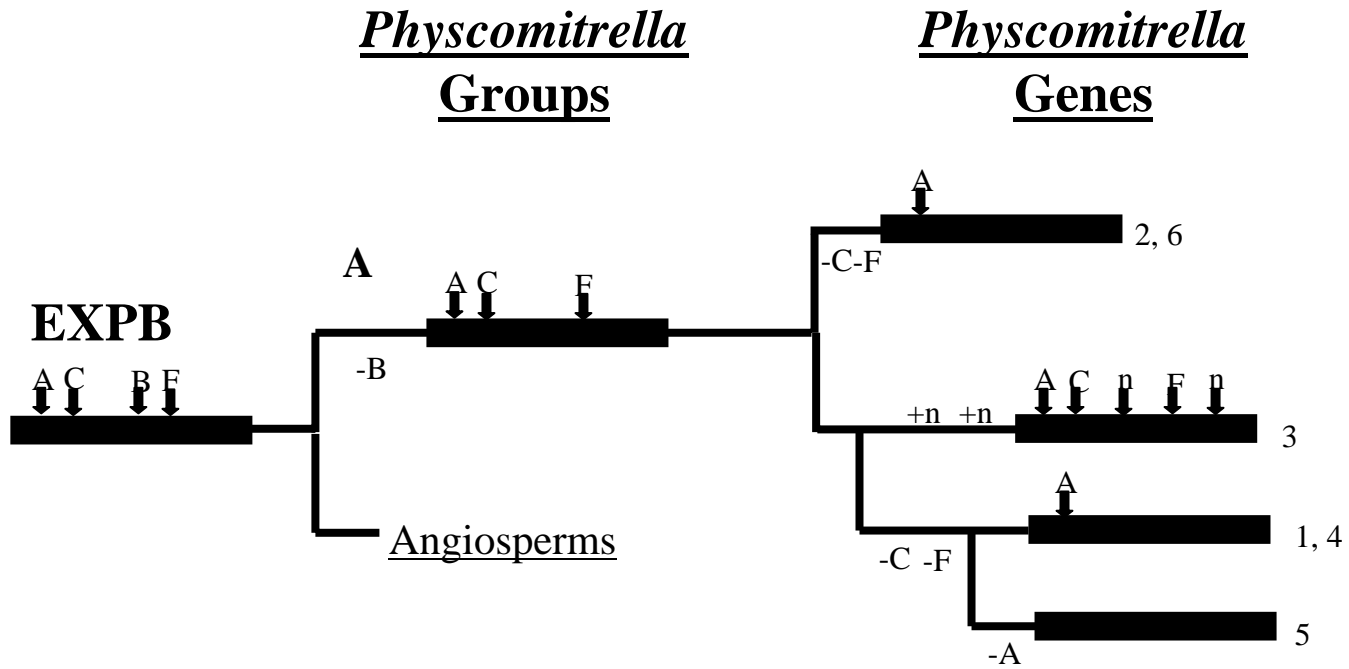

Fig. 5 – EXPB intron pattern evolution.

# EXPA

*Arabidopsis*  
/rice

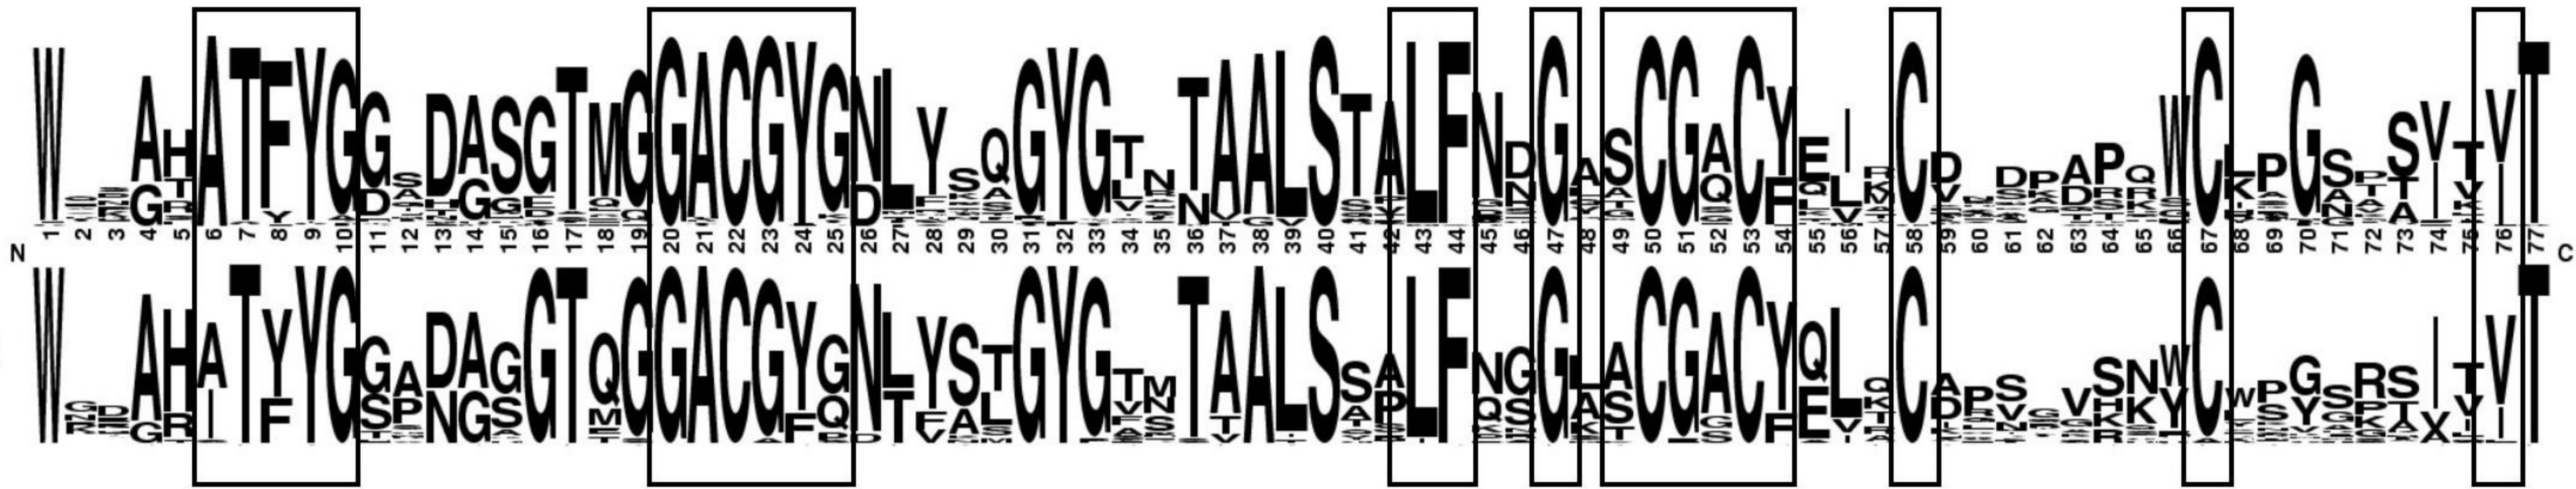

*Physcomitrella*

Domain 1 ← Domain 2 →

*Arabidopsis*  
/rice

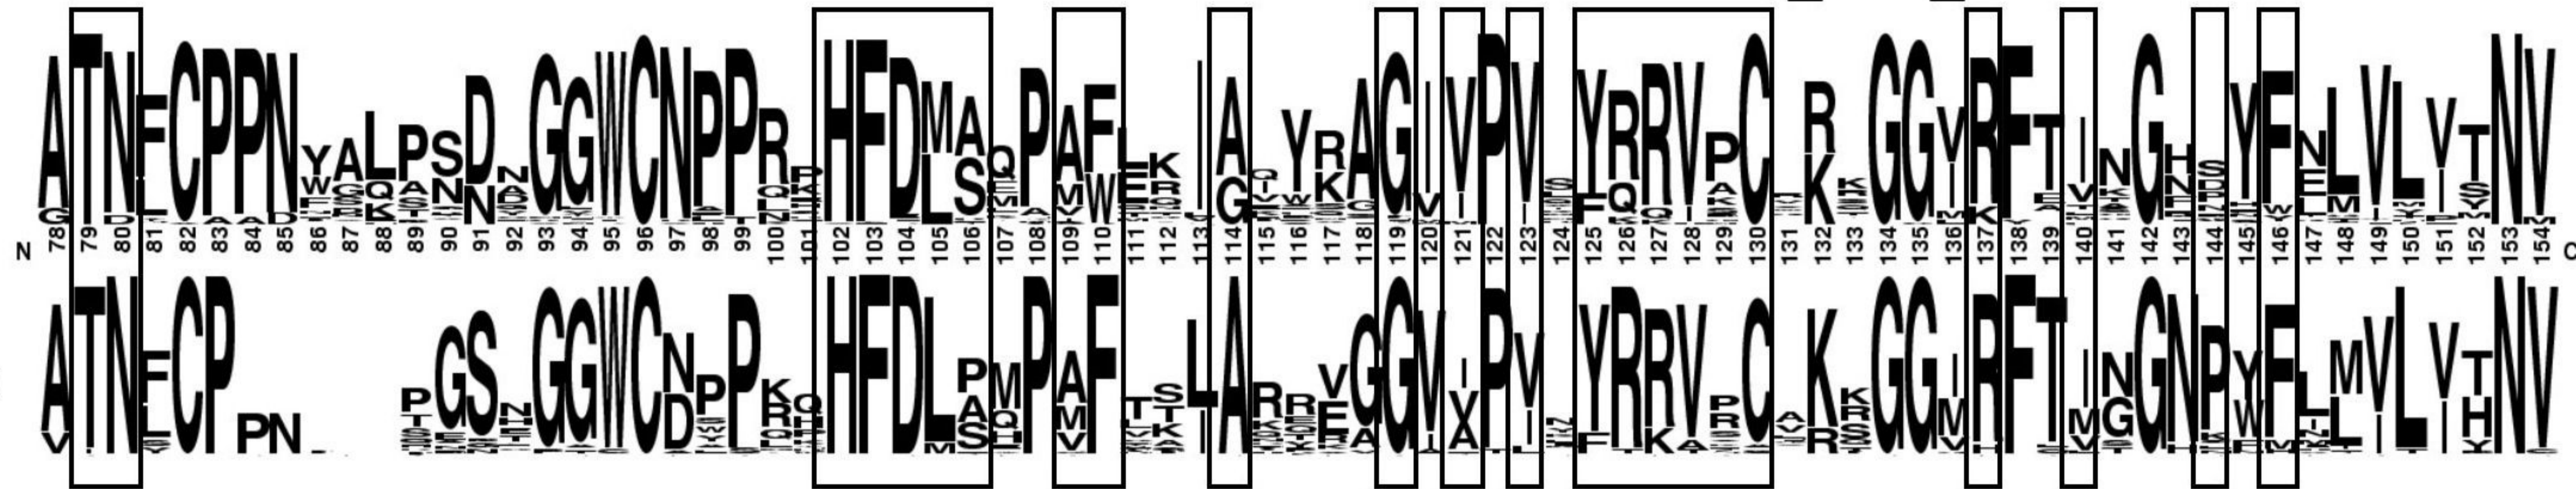

*Physcomitrella*

*Arabidopsis*  
/rice

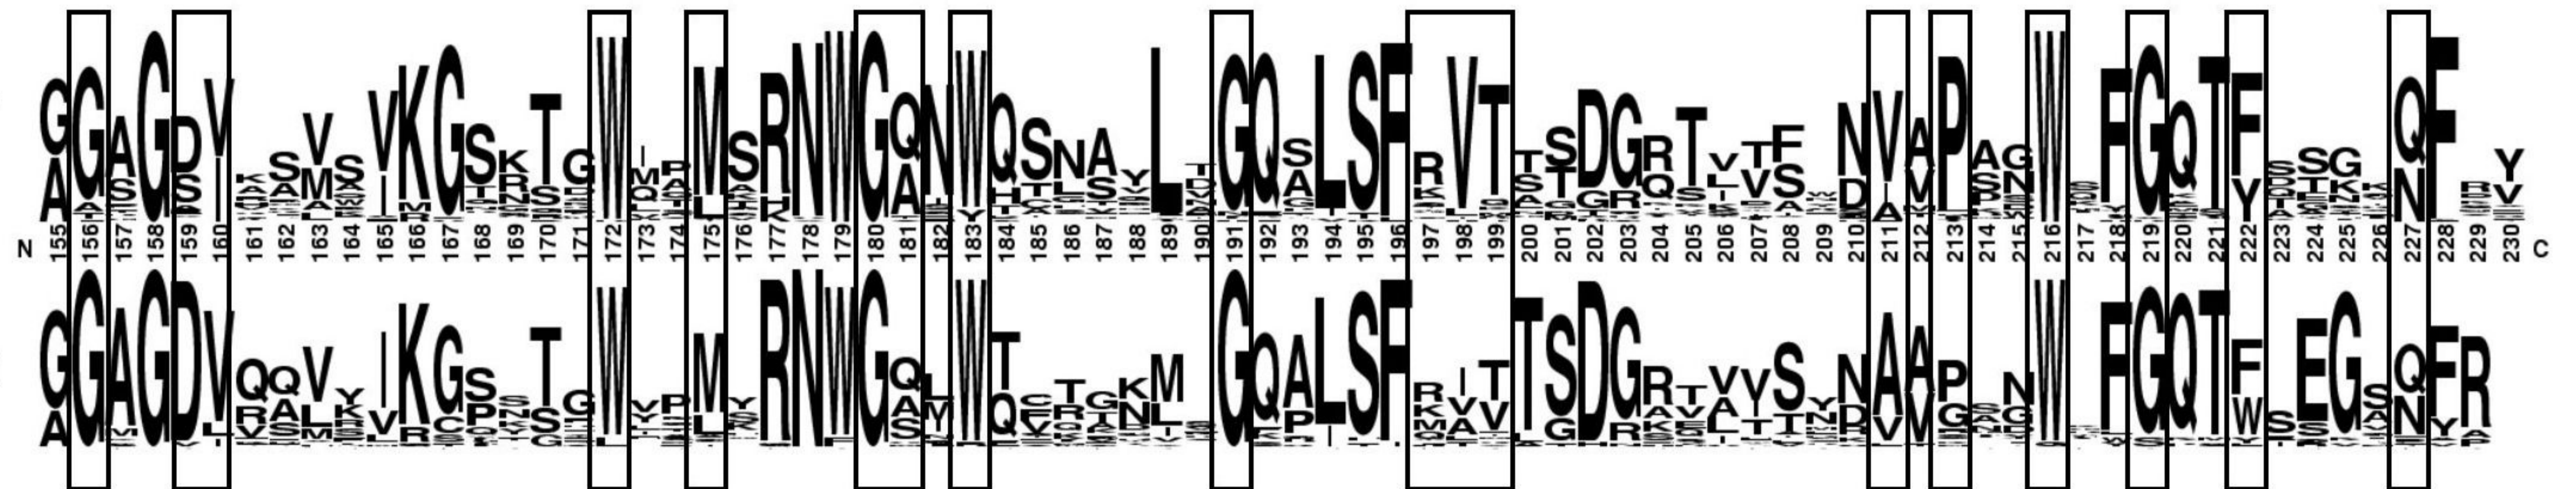

*Physcomitrella*

Fig 6 – EXPA sequence LOGO

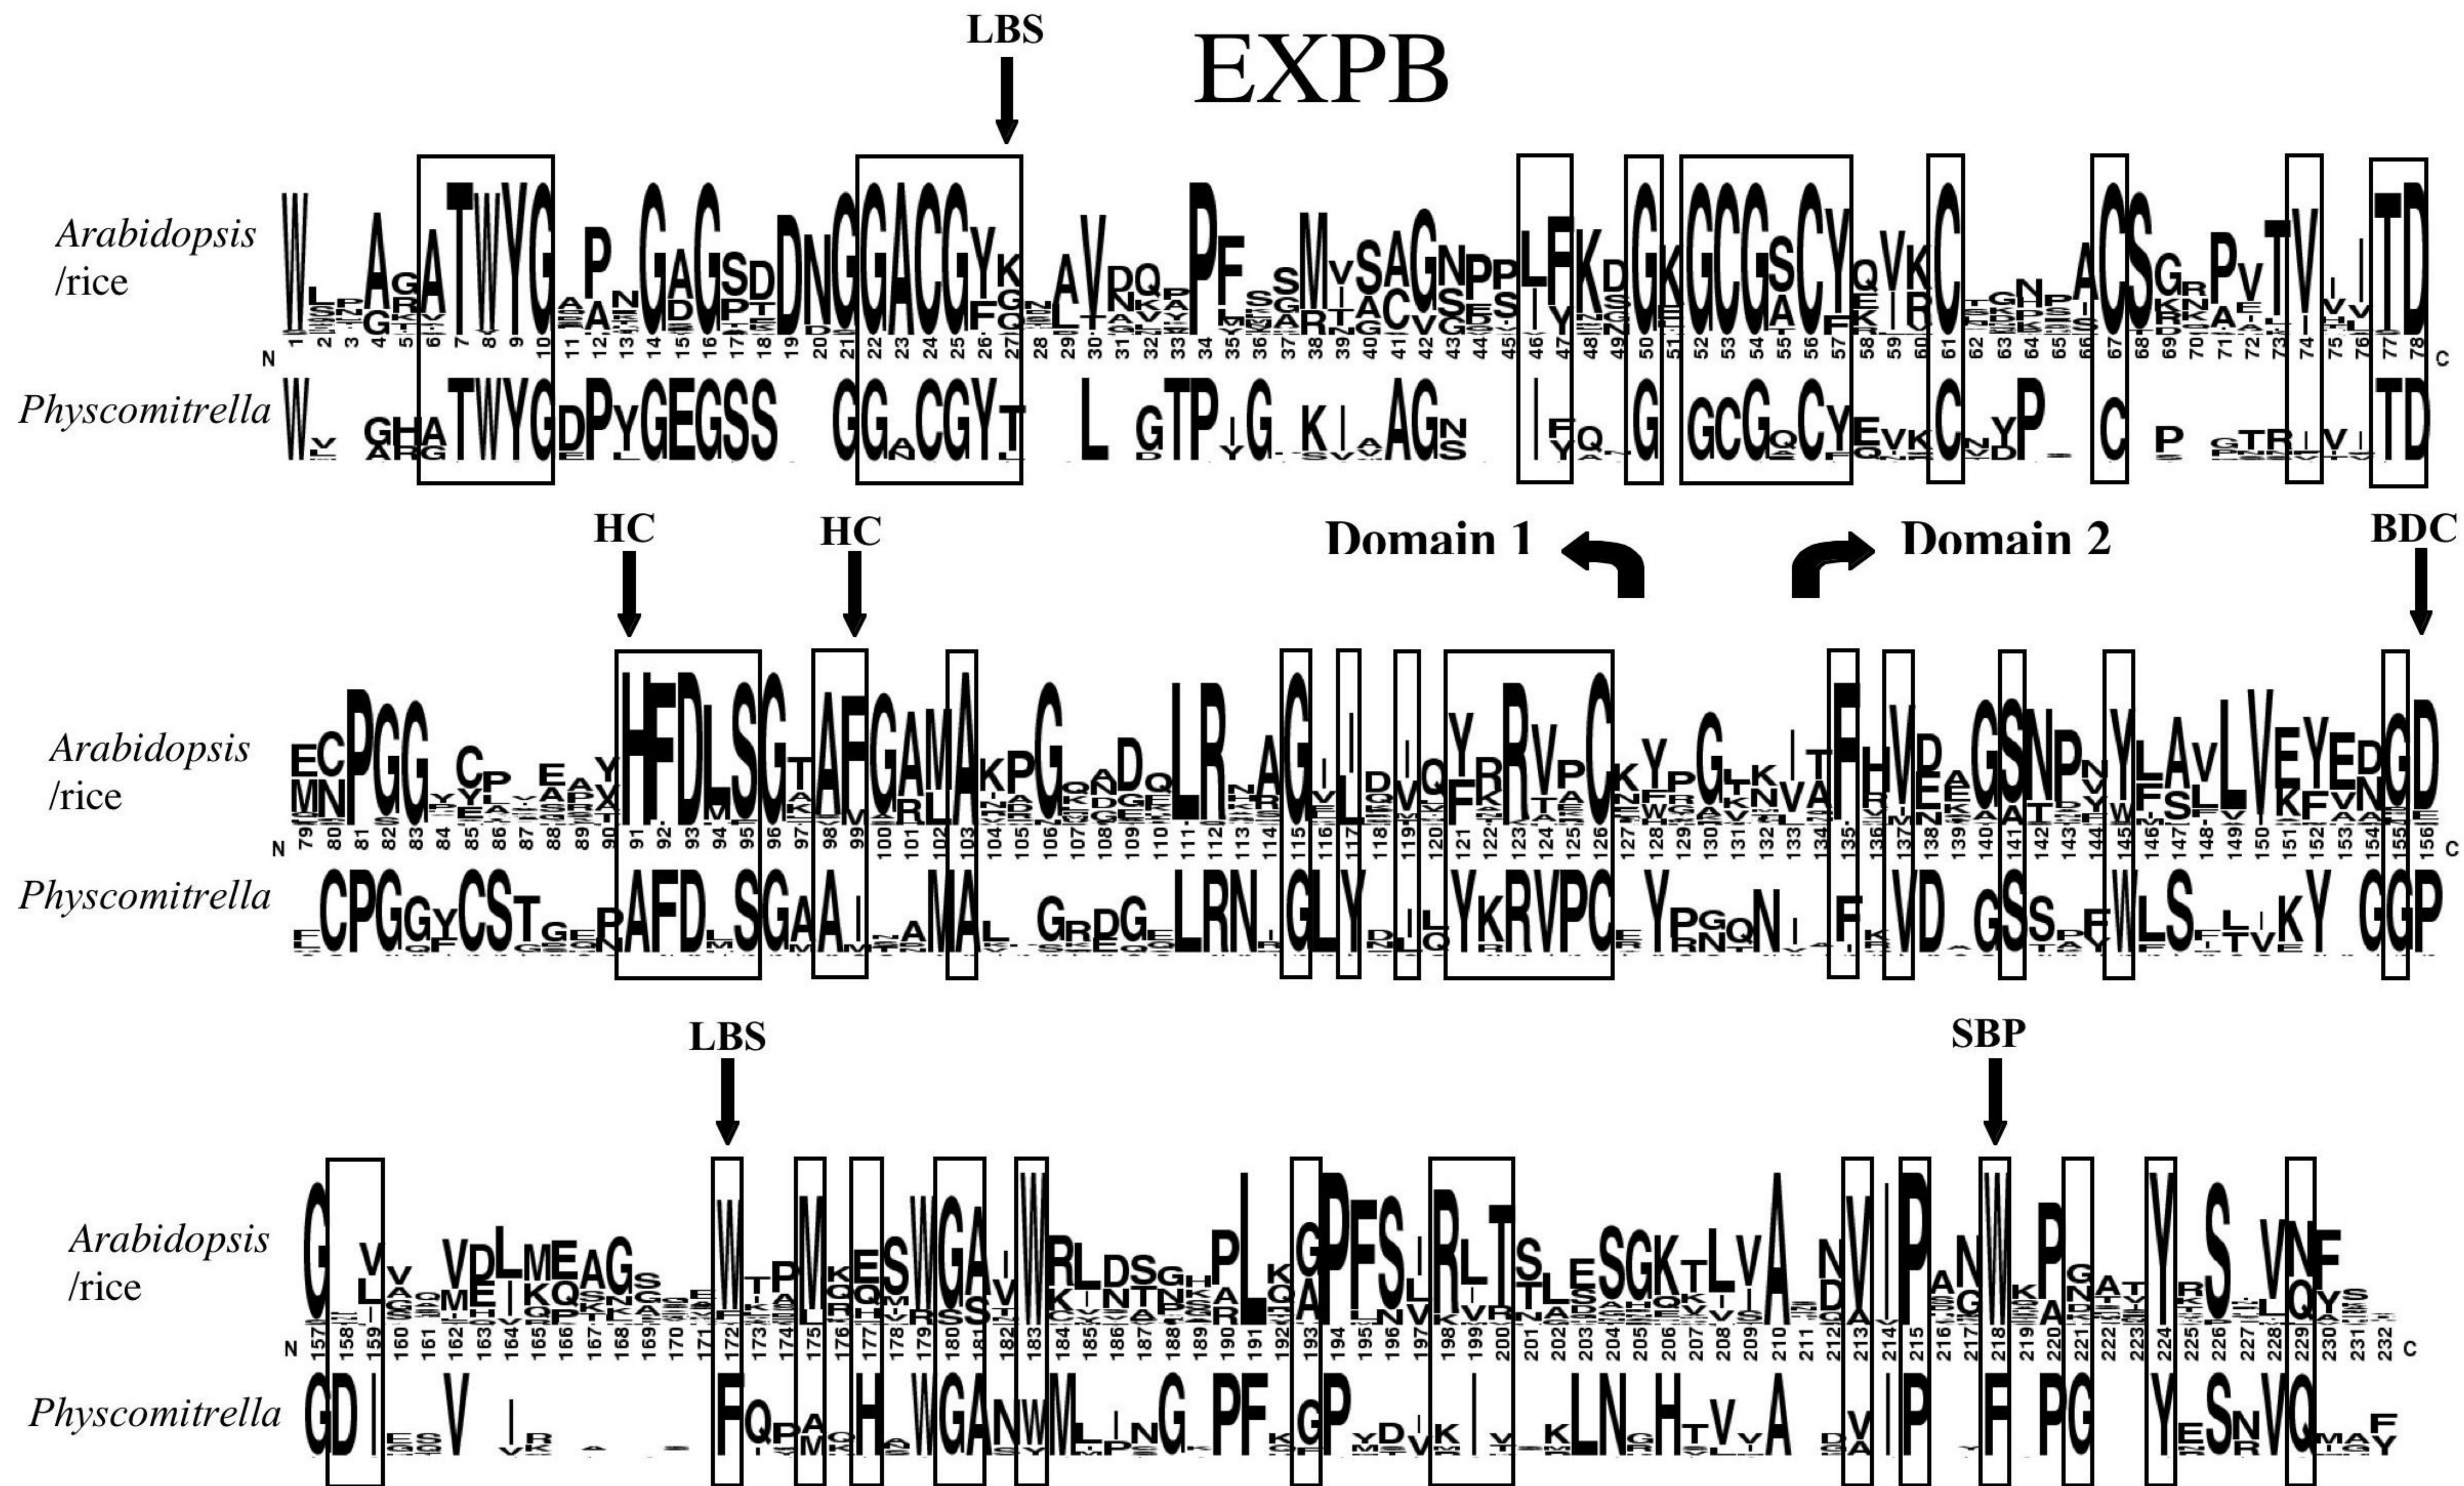

Fig. 7 - EXPB LOGO
