# Supplementary material
Source: PubMed Central journal article supplement (PMC3243571)
Supplement: supp_mcm044_mcm044_supp_Material.pdf [file supp_mcm044_mcm044_supp_Material.pdf]

## Methods for isolation of *PpEXPA5* and *PpEXPA6* sequence

### Plant material

*Physcomitrella patens* was grown on solid BCD minimal moss medium (1 mM MgSO<sub>4</sub>, 10 mM KNO<sub>3</sub>, 45 μM FeSO<sub>4</sub>, 1.8 mM KH<sub>2</sub>PO<sub>4</sub> pH 6.5) supplemented with 1 mM CaCl<sub>2</sub> and 5 mM ammonium tartrate, overlaid with cellophane disks from Leeds Innovations Ltd. (Leeds, West Yorkshire, UK) at 25 °C, under a photoperiod of 16 h light/8 h dark.

### Isolation of *PpEXPA5* and *PpEXPA6* genomic DNA sequences

*PpEXPA5* and *PpEXPA6* gene sequences were first amplified with the degenerate PCR primers 5'-GGNGCNTGYGGNTAYGGNAAYTNTAY-3' and 5'-RTTNSWYTGCCARTTYTGNCCCCA-3' (designed to conserved amino acid motifs from EXPA sequences) using genomic DNA extracted by a modified CTAB protocol (Murray and Thompson, 1980). <sup>32</sup>P-labelled cDNA probes (labelled with the Rediprime II random labeling kit from Amersham, Little Chalfont, Buckinghamshire, UK) corresponding to the *Arabidopsis* expansin genes *AtEXPA4*, *AtEXPA8*, *AtEXPA11* and *AtEXPA12*, were used on a DNA gel blot to identify products with a high sequence similarity to expansin genes.

Products hybridizing to this mixed probe were isolated with the Qiagen (Valencia, CA) gel extraction kit and cloned with the TOPO TA cloning kit from Invitrogen (Carlsbad, CA). To obtain the full-length genomic sequences, thermal asymmetric interlaced (TAIL)-PCR was performed according to a protocol adapted from Liu and Whittier (1995). The three nested specific primers 5'-CCAACAGAGCAGAAAATCAGATTC-3', 5'-CCCAAAGCATCTCAAAGAGAGTC-3', and 5'-GGCTGGATTGTCAAGGTCTACC-3' and the random degenerate primer AD1 (Liu and Whittier, 1995) 5'-TGWGNAGWANCASAGA-3' were used to obtain the complete 5'-end coding sequence of *PpEXPA5*. The three nested specific primers 5'-CAGCCCTTCGTTCAAACG-3', 5'-TGA CTCTCTTTGAGATGCTTTGG-3', and 5'-CGTTTCTGAATCTGATTTTCTGCTC-3' and the random degenerate primer AD2 (Liu and Whittier, 1995) 5'-AGWGNAGWANCAWAGG-3' were used to obtain the

complete 3'-end coding sequence of *PpEXPA5*. DNA gel blots and *PpEXPA5* genomic sequence probes were used to identify the desired products. TAIL-PCR products corresponding to *PpEXPA5* sequence were purified with the Qiagen gel extraction kit (Qiagen, Valencia, CA) and cloned with the TOPO-TA cloning kit (Invitrogen, Carlsbad, CA).

The TAIL-PCR sequence was then assembled into a contig with the original degenerate PCR sequence by means of the SeqMan program from the DNASTAR software package version 5.01 (DNASTAR, Madison, WI). Based on this sequence, the specific primers 5'-GGAGAAGCACAGACAGACAGAATC-3' and 5'-GTGGAGAAGCAAAGGTGGTC-3' were designed and used to amplify 1944 bp of *PpEXPA5* with Acupol proofreading polymerase from Gene Choice. The three nested specific primers 5'-TGAATGCAGACACATCGGATAC-3', 5'-CATTGCATCTACTTCCAGGTGAG-3', and 5'-GCAAATAGCACGAACCTTCG-3' and the random degenerate primer AD4 (Liu & Whittier 1995) 5'-TCSTICGNACITWGGA-3' were used to obtain the complete 5'-end coding sequence of *PpEXPA6*. DNA gel blots and *PpEXPA6* genomic sequence probes were used to identify the desired TAIL-PCR products. TAIL-PCR products corresponding to the *PpEXPA6* sequence were isolated with the Qiagen gel extraction kit and cloned with the TOPO-TA cloning kit (Invitrogen).

The complete 3'-end coding sequence for *PpEXPA6* was obtained by screening a lambda phage cDNA library (provided by Dr R. Quatrano, Washington University, St. Louis, MO). A 3' partial cDNA was obtained from this screen and used together with the TAIL-PCR product and degenerate PCR products to generate a contig with the SeqMan program. This sequence and the specific primers 5'-GGATGTACCAAACACTAGCATGTC-3' and 5'-GTGAGAGAAACCCATCCGAG-3' were used to amplify 2399 bp of *PpEXPA6* with Acupol proofreading polymerase (GeneChoice, PGC Scientifics).

### Isolation of *PpEXPA5* and *PpEXPA6* cDNA sequence by RT-PCR

For RT-PCR, total RNA from 14- or 28-d-old *Physcomitrella patens* was isolated with the RNeasy Plant Mini Kit (Qiagen). RT-PCR was performed with the Titan One-Step

RT-PCR System (Roche Diagnostics, Mannheim, Germany). Each 10- $\mu$ L reaction mixture was composed of 0.4 mM of each deoxynucleotide phosphate, 5 mM DTT, 0.3  $\mu$ M of each primer, and ~10 ng of RNA template. The primers (designed to the signal peptide and 3' UTR regions of the gene) used for *PpEXPA5* cDNA amplification were 5'-TAGCGTGTTGGTGACTC-3' and 5'-AGGTGGTCACGTGCAGATC-3', yielding a product of 925 bp with RNA from 28-d-old tissue (largely gametophyte tissue). Primers (designed to the signal peptide and 3' untranslated regions of the gene) used for *PpEXPA6* cDNA amplification were 5' – AAAGAACGCAGATTTCAAGG–3' and 5'-GTCAACTCTCCGCTACTGTCTAC–3', yielding a product of 1006 bp with RNA from either 14- or 28-d-old tissue.

### Degenerate PCR

For degenerate PCR, each 10- $\mu$ L reaction mixture was composed of 0.2 mM of each deoxynucleotide phosphate, 1  $\mu$ M of each primer, 0.1  $\mu$ L Taq polymerase (GeneChoice, PGC Scientifics), and between 100 and 200 ng genomic DNA. Annealing temperature was 'stepped down' from 65 °C to 45 °C by 1 °C per cycle. Twenty additional cycles were then run with an annealing temperature of 45 °C.

### Discussion of partial expansin sequences and other potential pseudogenes

It should be noted that there were several partial expansin sequences found in the EXPA and EXPB trace searches as well. Six partial *Physcomitrella* EXPA and three partial *Physcomitrella* EXPB sequences were found that could not be assembled into contigs with any of the other sequences found. *PpEXPB7* is lacking some 3' coding sequence and appears to be a pseudogene. In the case of the other three partial EXPB sequences, a gene encoding a protein highly similar to a 'putative retrotransposon nucleocapsid protein' is found less than 100 bp away from the gene fragment. All three of these gene fragments lack introns and contain one or more premature stop codons, suggesting that they are pseudogenes created by a retrotransposition event. Phylogenies using partial sequences (data not shown) seem to indicate that all of these partial EXPB genes are related to *PpEXPB5*, which is intronless. Two of these EXPB fragments are represented by multiple traces while one is represented by only a single trace. In the case of three of the six partial EXPA sequences, between 400 bp and 2400 bp of sequence on either side of the fragment

does not reveal additional expansin sequence. One of these sequences contains a frameshift and two contain multiple stop codons. Five of these partial EXPA sequences are represented by multiple traces while one is represented by only a single trace. These data would seem to indicate that these are pseudogenes. In the case of the other three EXPA partial sequences, the partial sequence is due to the end of a contig and the inability to find another trace with which to continue the sequence.

There are also two full-length EXPA sequences (*PpEXPA20* and *PpEXPA21*) and one full-length EXPB sequence (*PpEXPB6*) that contain one or more stop codons. However, because the coding regions of these genes seem to contain no other instances of sequence degradation, these stop codons are being treated as potential sequencing errors at present and not as evidence of pseudogenes.

## Literature Cited

**Liu YG, Whittier RF. 1995.** Thermal asymmetric interlaced PCR: automatable amplification and sequencing of insert end fragments from P1 and YAC clones for chromosome walking. *Genomics* **25**: 674–681.

**Murray YHG, Thompson WF. 1980.** Rapid isolation of highmolecular weight plant DNA. *Nucleic Acids Research* **8**: 4321–4325.

SUPPLEMENTAL TABLE 1. The smallest Poisson-corrected amino acid distance of each *Physcomitrella* gene to an *Arabidopsis* and rice expansin . The clades from which each of these *Arabidopsis* and rice genes come from is also given. The clade highlighted in yellow has its smallest distance to members of clades other than EXPA I-IV.

| <b>PC distance</b> | <b><i>Arabidopsis thaliana</i></b> | <b>Clade</b> | <b><i>Oryza sativa</i></b> | <b>Clade</b>  |
|--------------------|------------------------------------|--------------|----------------------------|---------------|
| <b>PpEXPA1</b>     | 0.344 AtEXPA10                     | EXPA - I     | 0.365 OsEXPA7              | EXPA - IV     |
| <b>PpEXPA2</b>     | 0.580 AtEXPA14                     | EXPA - II    | 0.621 OsEXPA4 and OsEXPA7  | EXPA - III/IV |
| <b>PpEXPA3</b>     | 0.443 AtEXPA15                     | EXPA - I     | 0.491 OsEXPA7              | EXPA - IV     |
| <b>PpEXPA4</b>     | 0.607 AtEXPA14                     | EXPA - II    | 0.594 OsEXPA4              | EXPA - III    |
| <b>PpEXPA5</b>     | 0.432 AtEXPA1 and AtEXPA16         | EXPA - I/IV  | 0.467 OsEXPA7              | EXPA - IV     |
| <b>PpEXPA6</b>     | 0.541 AtEXPA1 and AtEXPA4          | EXPA - I/IV  | 0.528 OsEXPA5              | EXPA - I      |
| <b>PpEXPA7</b>     | 0.491 AtEXPA9 and AtEXPA10         | EXPA - IV/I  | 0.479 OsEXPA6              | EXPA - III    |
| <b>PpEXPA8</b>     | 0.409 AtEXPA8                      | EXPA - III   | 0.421 OsEXPA4              | EXPA - III    |
| <b>PpEXPA9</b>     | 0.409 AtEXPA1                      | EXPA - I     | 0.421 OsEXPA5              | EXPA - I      |
| <b>PpEXPA10</b>    | 0.409 AtEXPA15                     | EXPA - I     | 0.409 OsEXPA7              | EXPA - IV     |
| <b>PpEXPA11</b>    | 0.443 AtEXPA1 and AtEXPA15         | EXPA - I     | 0.491 OsEXPA5              | EXPA - I      |
| <b>PpEXPA12</b>    | 0.387 AtEXPA1                      | EXPA - I     | 0.443 OsEXPA5              | EXPA - I      |
| <b>PpEXPA13</b>    | 0.479 AtEXPA8                      | EXPA - III   | 0.503 OsEXPA4              | EXPA - III    |
| <b>PpEXPA14</b>    | 0.503 AtEXPA15                     | EXPA - I     | 0.528 OsEXPA4              | EXPA - III    |

|                 |                                 |                   |                               |               |
|-----------------|---------------------------------|-------------------|-------------------------------|---------------|
| <b>PpEXPA15</b> | 0.491 AtEXPA8 and AtEXPA9       | EXPA - III/IV     | 0.467 OsEXPA6                 | EXPA - III    |
| <b>PpEXPA16</b> | 0.491 AtEXPA6                   | EXPA - IV         | 0.503 OsEXPA7                 | EXPA - IV     |
| <b>PpEXPA17</b> | 0.479 AtEXPA16                  | EXPA - IV         | 0.528 OsEXPA5                 | EXPA - I      |
| <b>PpEXPA18</b> | 0.635 AtEXPA14                  | EXPA - II         | 0.594 OsEXPA4                 | EXPA - III    |
| <b>PpEXPA19</b> | 0.649 AtEXPA14                  | EXPA - II         | 0.635 OsEXPA2 and OsEXPA4     | EXPA - III    |
| <b>PpEXPA20</b> | 0.767 AtEXPA10                  | EXPA - I          | 0.750 OsEXPA21                | EXPA - I      |
| <b>PpEXPA21</b> | 0.649 AtEXPA14                  | EXPA - II         | 0.708 OsEXPA6 and OsEXPA7     | EXPA - III/IV |
| <b>PpEXPA22</b> | 0.649 AtEXPA4                   | EXPA - IV         | 0.594 OsEXPA21                | EXPA - I      |
| <b>PpEXPA23</b> | 0.554 AtEXPA14                  | EXPA - II         | 0.580 OsEXPA4                 | EXPA - III    |
| <b>PpEXPA24</b> | 0.607 AtEXPA14                  | EXPA - II         | 0.594 OsEXPA4                 | EXPA - III    |
| <b>PpEXPA25</b> | 0.678 AtEXPA4,AtEXPA14,AtEXPA25 | EXPA - IV/III/XII | 0.635 OsEXPA4                 | EXPA - III    |
| <b>PpEXPA26</b> | 0.635 AtEXPA14                  | EXPA - II         | 0.649 OsEXPA4,OsEXPA5,OsEXPA6 | EXPA - III/I  |
| <b>PpEXPA27</b> | 0.516 AtEXPA14                  | EXPA - II         | 0.541 OsEXPA5                 | EXPA - I      |
| <b>PpEXPB1</b>  | 0.794 AtEXPB2                   | EXPB - I          | 0.763 OsEXPB5 and OsEXPB14    | EXPB - I      |
| <b>PpEXPB2</b>  | 0.827 AtEXPB3                   | EXPB - II         | 0.805 OsEXPB5                 | EXPB - I      |
| <b>PpEXPB3</b>  | 0.794 AtEXPB1 and AtEXPB3       | EXPB - II         | 0.827 OsEXPB5                 | EXPB - I      |
| <b>PpEXPB4</b>  | 0.816 AtEXPB3                   | EXPB - II         | 0.773 OsEXPB14                | EXPB - I      |
| <b>PpEXPB5</b>  | 0.753 AtEXPB3                   | EXPB - II         | 0.794 OsEXPB1                 | EXPB - I      |
| <b>PpEXPB6</b>  | 0.838 AtEXPB1                   | EXPB - II         | 0.849 OsEXPB5 and OsEXPB14    | EXPB - I      |

**PpEXPB7**

0.872 AtEXPB3

EXPB - II

0.895 OsEXPB11

EXPB - I

---

SUPPLEMENTAL TABLE 2. Average nucleotide composition of *Arabidopsis*, rice and *Physcomitrella* EXPA genes. Values given are a percentage of all nucleotides in a dataset trimmed as was done for the phylogenies presented here.

| Species                      | Ave % T | Ave % C | Ave % A | Ave % G |
|------------------------------|---------|---------|---------|---------|
| <i>Arabidopsis thaliana</i>  | 25.3    | 22.8    | 26.1    | 25.9    |
| <i>Oryza sativa</i>          | 15.4    | 32.9    | 17.3    | 34.5    |
| <i>Physcomitrella patens</i> | 22.2    | 26.4    | 22.1    | 29.4    |



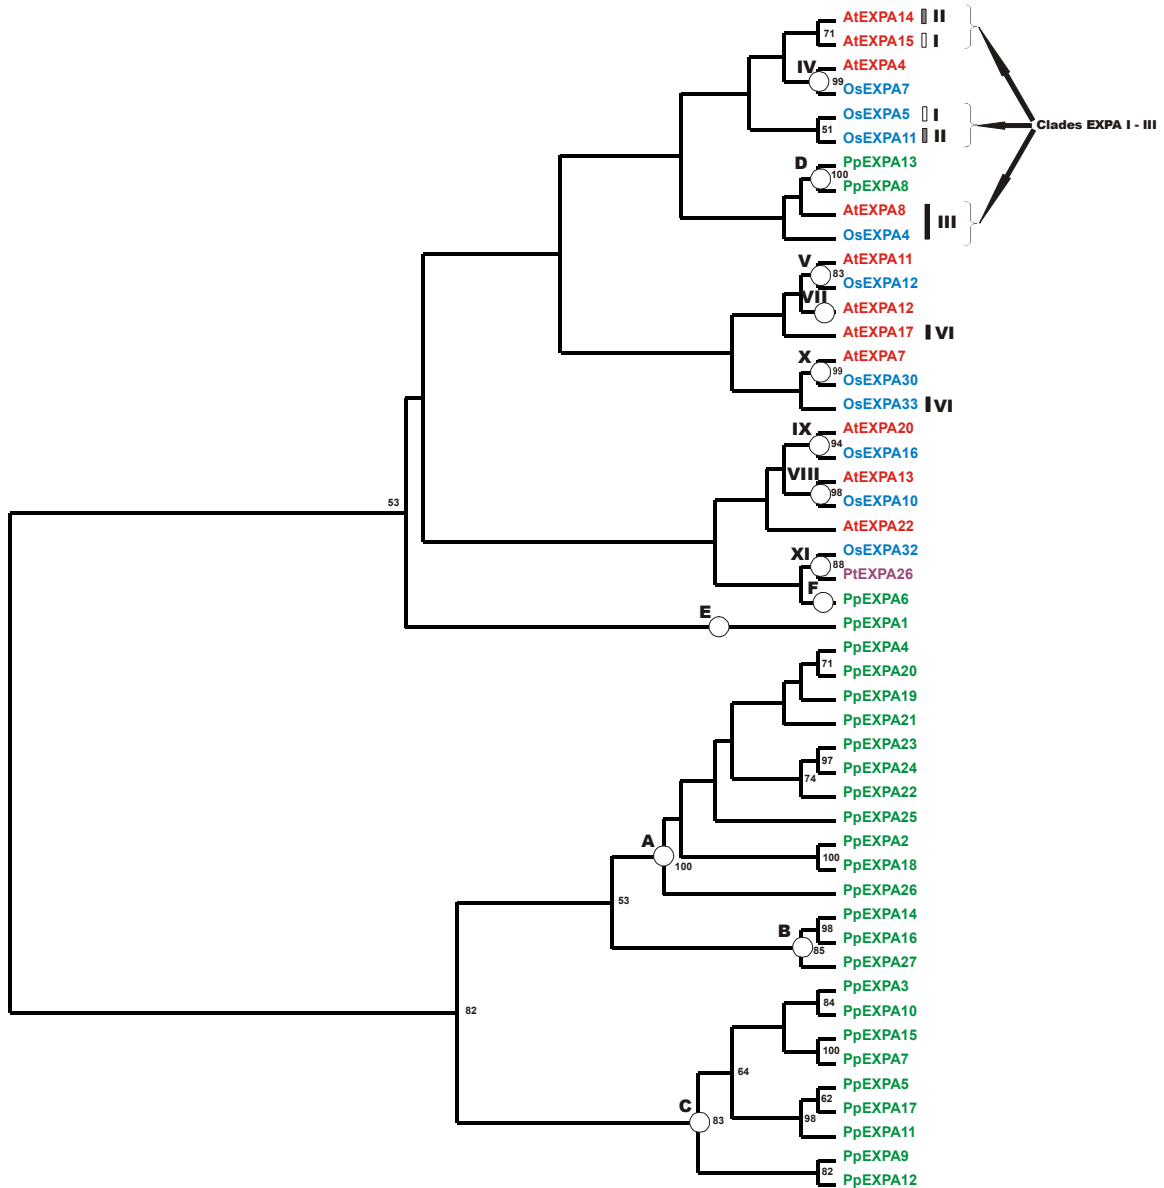

SUPPLEMENTAL FIG. 1. One of two maximum-parsimony EXPA trees of length 2282. Significant bootstrap values from the bootstrap consensus tree are indicated. The tree was rooted manually at groups A, B and C. Clade and groupings are marked with circles (or bars when they are poorly resolved as in the case of clades EXPA-I, EXPA-II and EXPA-III). *Physcomitrella patens* sequences are labelled in green, rice sequences in blue, *Arabidopsis* sequences in red and a *Populus* sequence in violet.

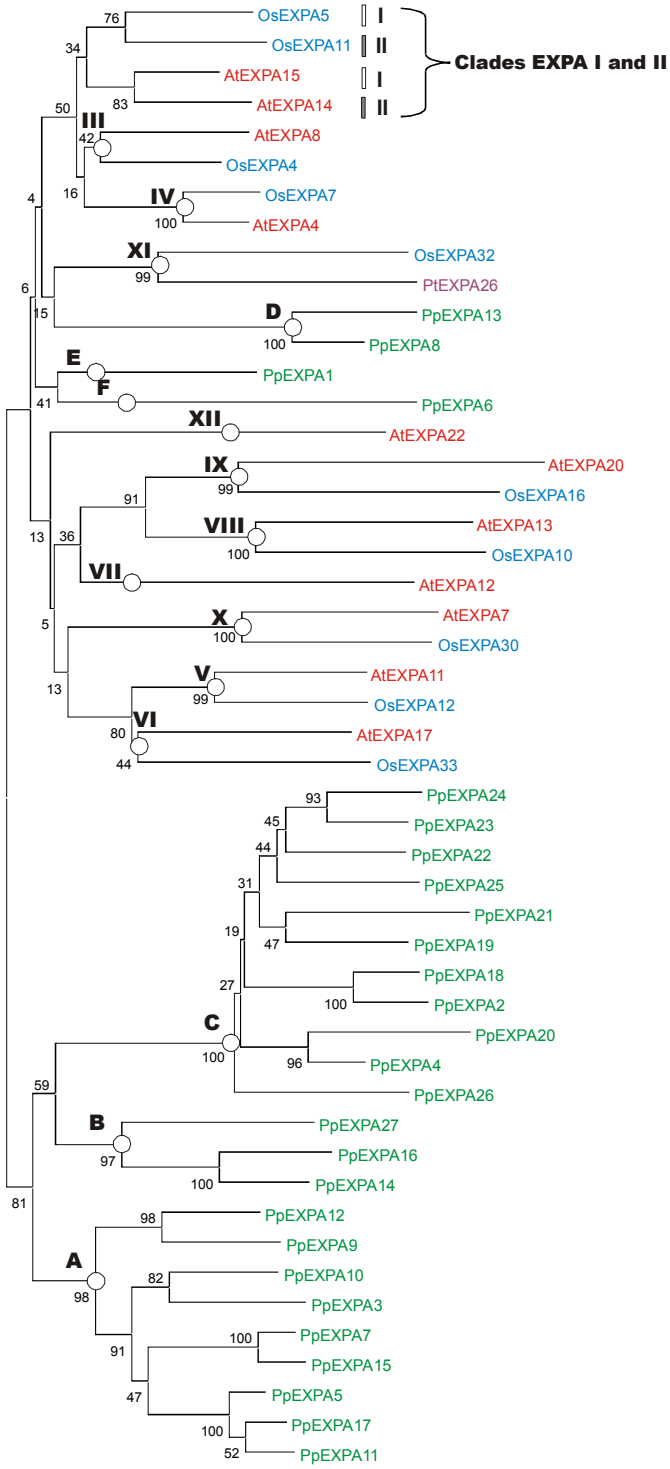

SUPPLEMENTAL FIG. 2. Neighbour-joining tree for EXPA family. The tree was rooted manually at groups A, B and C. Clade and groupings are marked with circles (or bars when they are poorly resolved as in the case of clades EXPA-I and EXPA-II). *Physcomitrella patens* sequences are labelled in green, rice sequences in blue, *Arabidopsis* sequences in red and a *Populus* sequence in purple.

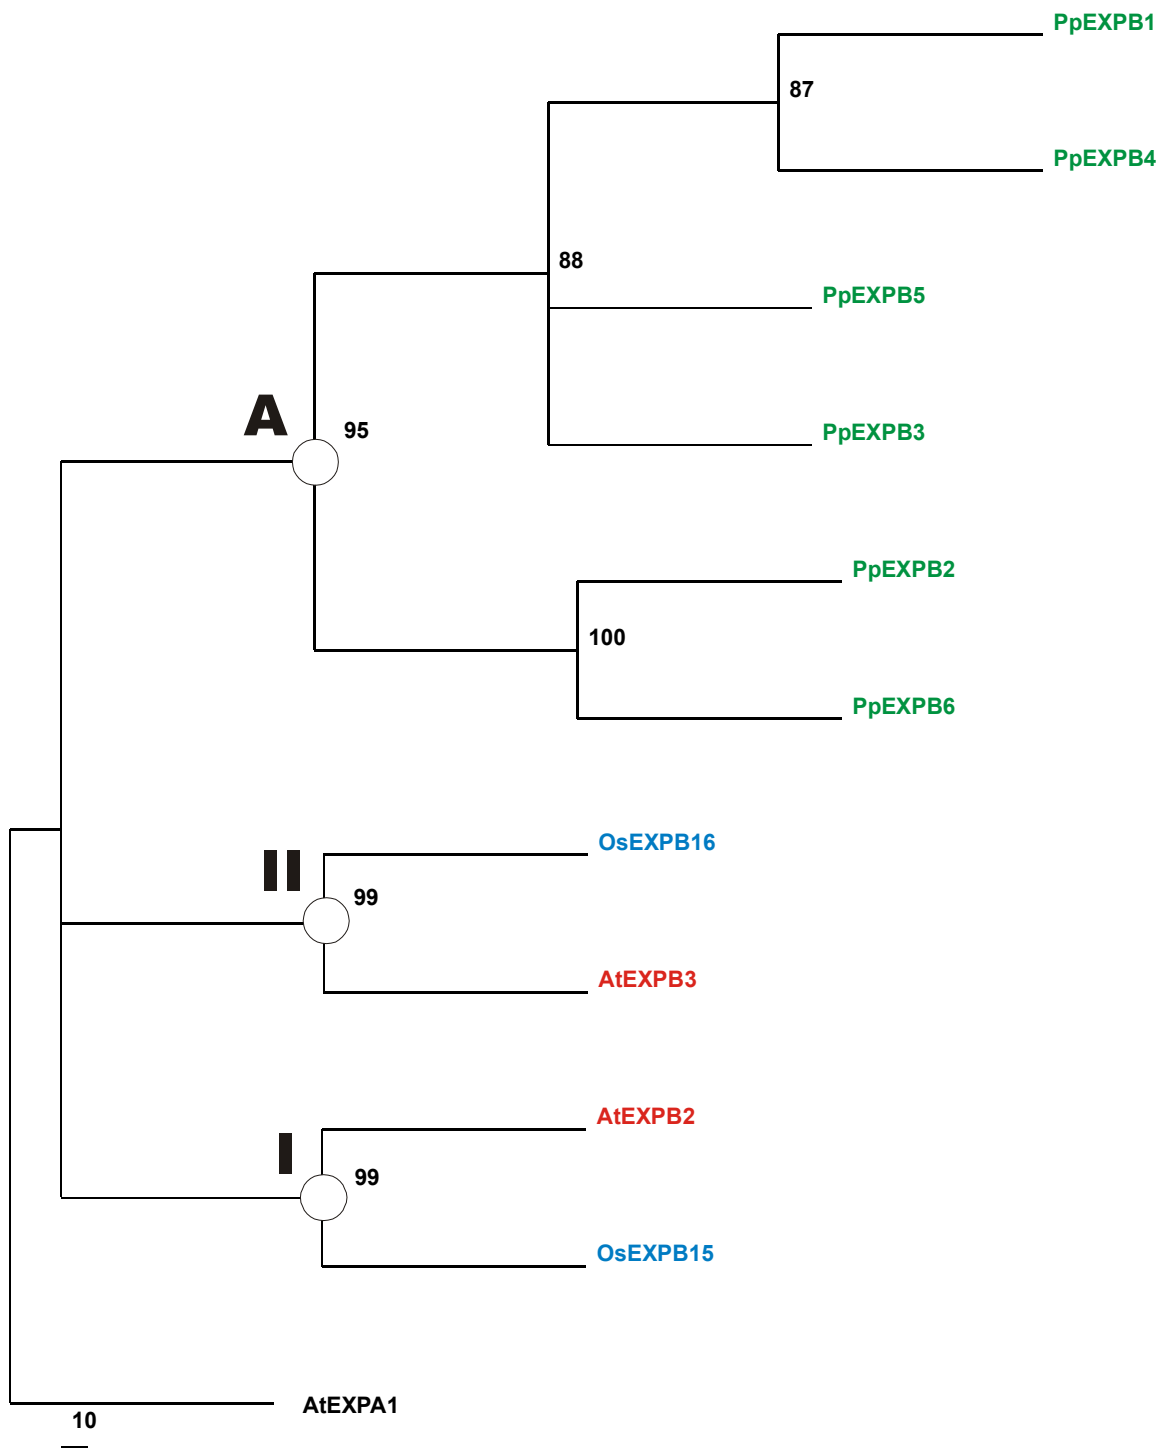

SUPPLEMENTAL FIG. 3. Bootstrap consensus parsimony tree obtained for the EXPB family. The tree was rooted manually at *AtEXPA1*. Clade and groupings are

marked with circles. *Physcomitrella patens* sequences are labelled in green, rice sequences in blue and *Arabidopsis* sequences in red.

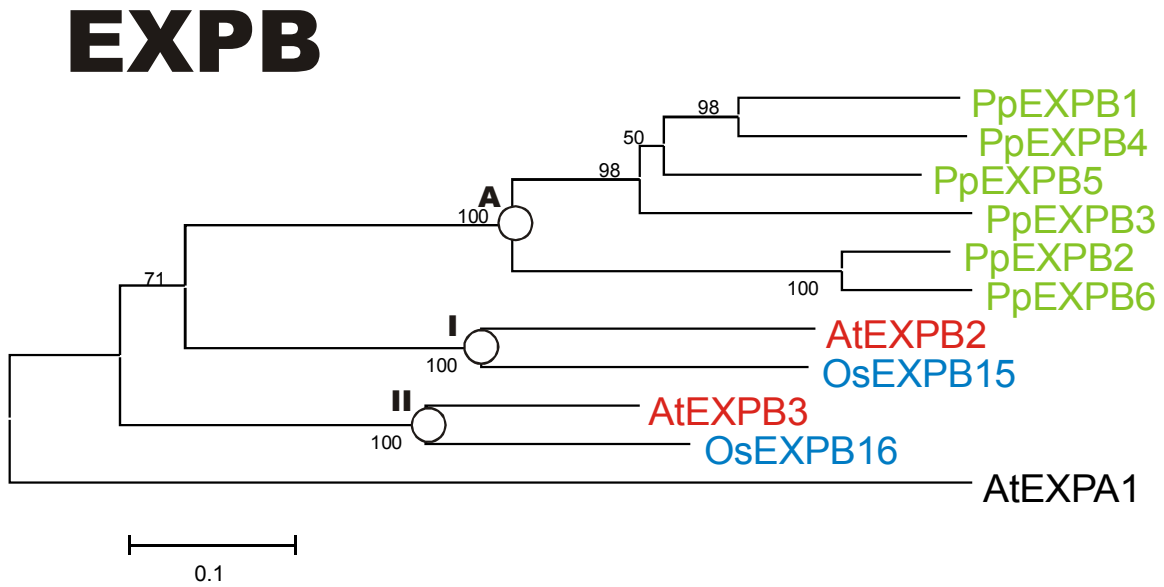

SUPPLEMENTAL FIG. 4. Neighbour-joining tree for EXPB family. The tree was rooted manually at AtEXPA1. Clade and groupings are marked with circles. *Physcomitrella patens* sequences are labelled in green, rice sequences in blue, and *Arabidopsis* sequences in red.

SUPPLEMENTAL FIG. 5. *Physcomitrella* expansins assembled from trace data. Named genes and their intron patterns are followed by their amino acid and nucleotide sequence. Introns in the nucleotide sequence are marked in red.

=====

Format:

>Sequence name [intron pattern]

### Amino acid sequence

>Sequence name

Nucleic acid sequence (introns in red)

>PpEXPA1 [AB]

MARHNATKPVTLLILAALMVLSATDNVEGRHHVDRGKNWRKAHATFYGGADASGTMGGACGYGNLYSTGYGVD  
STALSTALFNNGAKCGACFAIQCYRSQYCVPGSPVITVTATNFCPPNHKGDGTPGWCNPPMRHFDLAQPSFT  
KIAKYRAGIVPVLFRVPCEKKGVRFTINGNKYFNLVLVHNVGGKGDVHAVDIKGSNTEWIPMKRNWGMNW  
QTDVMTGQALSFRVTTSDGKTIIVSMNATPSHWSFGQTFEGGQFAMN

>PpEXPA1

ATGGCGAGGCATAATGCAACAAAGCCTGTGACACTCATTCTTGCTGCACTGATGGTTCTTTTCAGCCACCGAC  
AACGTCGAAGGTCGTCATCACGTCAGAGATGGAAAAAAGCTGCGCAAAGCTCATGCAACTTTCTACGGGGGT  
GCTGATGCTTCAGGAAGTATGGGTAACCTTTTTTCAACCTCTTGTTCACCTTCGGAGGCGTCCCATGAATCCT  
TACAAGTAGTAATTAAGCTTAAAGTTTCTTGACAATGTGTATGCTTCCTATCTATTTGGAATAAACCATTC  
CTCTGCTCTGATCAGAACTTGAATCAGCTGCAAAGAGAATAAGACGCCAATATACATGTATCAGAAAATA  
ACGAAGAGGACTACAAATTTTGGATCTCTTCCATGTAGCTCTTGTCCATAAGGCACCACCTTATGGAGAAAT  
TTTTTTTTCGAAAGTTTTGAATTCAGAGATCGGTTGACTAAATAGTAACCTTCGAATGTGCAGACGGTGCATG  
CGGTGCATGCGGTTACGGAAACCTCTACAGCACTGGCTATGGAGTCGATTCGACAGCTTTGAGTACAGCTCT  
TTTCAACAATGGGGCAAATGCGGAGCTTGTTTTGCGATCCAATGCTATCGTTCACAGTATTGCGTTCCAGG  
TTCACCTGTAATCACTGTACAGCTACAACTTCTGCCCTCCTAACCACAAAGGTGATGGCAGCCAGGATG  
GTGTAATCCGCCAATGCGTCACTTCGACCTTGCGCAGCCTAGCTTCACCAAATCGCTAAGTATAGAGCCGG  
CATCGTCCCCGTTCTCTCAGAGGTGTGCATTGCGTTGAAGACTGATTTGTAAATTGTGACTTTAAGCCTT  
AATTACTGAGGATGGAGACAGCTGTGCAATCACTTCGCAAATTAACCATGCATGTTTTTAAGAAAACAGAA

ACGGCAGAACAAACCGTCAGCCAATTGAAAGAGATGTTCTGAACTTAGTAAAAGAGGTTGTCTTAGTCCTG  
TTTGGATTGGTAGTTTGATATTACGAAGTCCGTACTGACCAAACTTTGTTATATGCCTTGACAATGCAGG  
GTACCATGCGAGAAAAAAGGTGGCGTCAGGTTCACTATCAATGGAAATAAGTATTTCAATCTCGTCCTAGTT  
CACAATGTTGGTGGAAAAGGCGATGTGCACGCAGTAGACATCAAGGGATCCAATACAGAATGGATTCCCATG  
AAGCGAACTGGGGAATGAACTGGCAGACAGATGCTGTTATGACTGGCCAGGCACTCTCCTTCCGAGTGACA  
ACCAGTGATGGTAAGACCATAGTCTCTATGAACGCAACGCCATCTCACTGGAGCTTCGGCCAGACCTTCGAG  
GGAGGTCAGTTCGCTATGAATTG

>PpEXPA2 [none]

GTRKLAVCIAAVAILALNSLPSVLGAPYGWKEAHITYYGTANGGGTQGGACGYPNTFAMGYGVMTAALSYP  
L FQGGKSCGACYQLKCKWLAPTRTVHNWCWSYSRTITITATNSCPPGSHGGWCDWKPHFDLPMPAFMTLARRE  
GGVAPVYYRQVRCARGGIRFTLGGNPYFMMILIHNVGGAGDLRAVKIKGRNGYWVPMWQNWGALWTCCKTL  
SGALS FQITTDGRTVTVNRAVDYWKFGQTWEQSQFR

>PpEXPA2

GGCACGAGGAACTCGCAGTTTGCATTGCCGCAGTCGCTATTTTGGCACTGAACTCCCTGCCTTCGGTGCTT  
GGAGCACCATAACGGATGGAAGGAGGCGCATATCACGTACTATGGAACAGCTAATGGCGGTGGCACACAGGGA  
GGCGCATGCGGATATCCGAACACCTTTGCGATGGGATACGGGGTGATGACCGCAGCATTGAGTTATCCTTTG  
TTCCAGGGCGGAAAGTCTTGCGGGGCGTGTTACCAGCTGAAGTGCAAATGGCTGGCGCCCACTCGCACCGTT  
CACAACCTGGTGCTGGAGCTACAGTCGCACCATCACTATCACTGCAACAACTCGTGCCCTCCAGGATCGCAC  
GGAGGTTGGTGC GACTGGAAGCCTCACTTCGACTTGCCCATGCCTGCTTTTCATGACATTGGCGCGGCGTGAA  
GGAGGAGTGGCCCCGTGTACTACAGAAAGGTTCCGGTGTGCGAAGCGCGGCGGAATTCGGTTTACCCTTGGC  
GGCAACCCATACTTCATGATGATCTTGATTACACAACGTGGGAGGTGCAGGCGATTTGAGGGCAGTGAAGATC  
AAGGGGCGGACGGATATTGGGTACCAATGTGGCAGAACTGGGGTGC GCTGTGGACATGCAAAACGAAGTTGA  
GCGGAGCATTGTCTTTCCAGATCACGACGGGCGACGGGCGCACTGTGACGGTTAACAGAGCAGTTGGAGACT  
ACTGGAAGTTTGGACAAACGTGGGAGGGCTCTCAGTTCCGATAG

>PpEXPA3 [AB]

MAMATHVALLLV SALALVTSVQSGYAGSDWISGVAHATFYGGVDAQGTQGGACGYGNLYSTGYGTSTTALSS  
ALFNAGLSCGACFELKCD SANSKYCLPGDKSITVTATNYCPQSGDGGWCDS PKQHFDLSHPMFTSLAQEVGG  
VIPVTYRRAPCAKKGMRFTINGNPWFVMILVTNCGGAGDVQQLQIRGSDTPWYPCVRNWGMWQMTSDPNL  
PGKALSFRATLSDGSVAESLNAAPSNWGWGQTFEGVATY

>PpEXPA3

ATGGCGATGGCTACCCATGTTGCGCTCTTGCTCGTATCTGCTCTAGCGTTGGTGACTTCGGTGCAGTCTGGG  
TATGCTGGCAGCGACTGGATCAGCGGCGTTGCTCATGCGACGTTCTACGGTGGCGTGGACGCACAGGGA

CAAGGTGTGAATCTAATGCAGCTCCTCTAGAGGGTAGCGGGTCTTTGAACTGGGAAGTTTTCTAGCTCGGC  
AATGTCGAGGATTGGATGGATGCGTTGATAGATACATCGATAGATGAATTACTGAAGGTGTCCACAGGTCCA  
TGTTCTTGAAGACGCCTGAGCATGTTTCGACATAGCAGTTCTCAATGGGTATGTGCAGGTGGAGCTTGCGGTT  
ACGGAAACCTCTACTCAACCGGATATGGCACCAGTACCACCGCACTCAGTAGTGCTTTGTTTAATGCGGGCC  
TTAGCTGCGGAGCCTGCTTCGAACTCAAGTGCACAGCGCCAACTCCAAGTACTGTCTTCCAGGGGACAAGT  
CCATCACAGTTACAGCAACGAACTACTGTCCTCAGGGCTCAGATGGCGGGTGGTGCATTCCCCGAAGCAGC  
ACTTCGACCTCTCGCACCCCATGTTACCAGCCTTGCTCAAGAGGTTGGGGGTGTCATTCCCGTCACGTATC  
GGAGGTCAGTCATTCAATCTACTCTCCTTCTTACACGCGTTCTTTGAATTGCATCAATACTACATCGTGAG  
TCGCCCAATTGATACGTCACCGCTCACTCTCTTTTTTCGCTGCCTGTGCTTCTTCAGAGCTCCTTGTGCAAAG  
AAAGGCGGCATGAGGTTACAATTAACGGCAACCCATGGTTCGTGATGATACTAGTCACCAATTGCGGTGGT  
GCAGGAGATGTGCAGCAACTTCAGATCAGGGGCAGCGACACCCCGTGGTACCCTTGCCTCCGCAACTGGGGA  
CAGATGTGGCAGATGACCTCGGACCCAAATCTGCCTGGGAAGGCACTCTCCTTCAGAGCTACCCTGAGTGAC  
GGCAGCGTGGCCGAGTCTCTGAACGCCGCGCCCTCCAAGTGGGGTGGGGTCAAACGTTTCGAGGGCGTCGCT  
ACCTACTAG

>PpEXPA4 [B]

MGSICSMKFPILMVAFLALGLPSVLGAPYGWKDAHITYYGSPPNGGGTQGGACGYQNTYALGYGSFTAALSAP  
LFQGGAACGGCYQLKCAPVRETRTVHNWCWSYSRSIVVTATNLCPGSHGGWCAWRPHFDLPMPAFTSLAKQ  
VGGVAPVFYRRVRCAKRGVRFITIGGNPYFLMVLHNVGGAGDIRSVRIKQYSGWVTMFRNWGSLWTCRTK  
LSGPLSFMITTS DGRTLVS NRAVGSWWKFGQTWEQSQFR

>PpEXPA4

ATGGGTTCCATATGCAGCATGAAGTTTCCCATTCTCATGGTCGCCTTTTTAGCGCTGGGCTTACCTTCGGTG  
CTTGGAGCACCTTATGGATGGAAGGATGCGCACATTACCTACTACGGATCTCCAACGGCGGAGGGACGCAG  
GGAGGTGCTTGCAGATATCAGAATACTTATGCCCTCGGATACGGATCTTTCAGTGCAGGATTGAGTGCCCCG  
TTGTTTCAAGGAGGAGCCGCTTGCAGGGGATGCTACCAGCTTAAGTGTGCACCAGTGAGAGAAACCAGAACC  
GTGCATAACTGGTGTGGAGTTACTCTCGCTCTATCGTTGTACCAGCTACGAACCTGTGCCCCGAGGATCT  
CACGGAGGGTGGTGCAGATGGCGCCCCACTTCGACTTACCAATGCCTGCTTTCACCTCTCTCGCAAAGCAA  
GTAGGAGGTGTTGCTCCTGTCTTCTACAGAAGGTGTGTGACCTGGTGTATATGGTCCTTATTATTTATTCAA  
ATCCGCTTCAAATGTCACTGCTGTTTTGGGTTGAATACTAATCTTGTTGAGAAATGTTTGATATCCAGGGTAA  
GATGCGCTAAGCGCGGTGGAGTTCGCTTACGATCGGAGGAAATCCATACTTCTTGATGGTTCTGATCCACA  
ACGTCGGGGGAGCAGGCGACATCAGGTCTGTGAGGATCAAAGGGCAATACTCAGGATGGGTGACCATGTTCC  
GTAAGTGGGGTTCAGTGTGGACTTGCCGGACTAAGTTGAGTGGACCCCTGTCCTTCATGATTACCACCAGCG



ACGGACGCACTCTAGTGTCCAACAGAGCCGTGGGATCGTGGTGAAATTCGGACAAACCTGGGAGGGTAGCC  
AGTTCAGATAG

>PpEXPA5 [AB]

MAIPWSSVVLVTLVSLMACAEAKGSSFMGSDWGRAHATFYGGADASGTQGGACGYGNLYSTGYGTNTAALSS  
SLFNGLSCGACYELTCDPSCSQYCLPGGSAIITATNFCPTGSNGGWCNPPKQHFDLAQPVFSKIARTVGGV  
IPINYRRVPCSKSGMRFTVNGNPFYLLVLTNVGGAGDVQQLYIKGASTGWLPLKRNWGMWQFTGNSGMH  
GQAISFKAVTSDGAEAISPNVAPANWGFQTFEGSNF

>PpEXPA5

For nucleotide sequence see Figure S6

>PpEXPA6 [AB]

MPSISSFEKNADFKGSSFSTETTLSTDDQPDEVFARKAGYAPVPRSYGGVWRNARSTFYGGMDAAGTMSGAC  
GYGNLYASGYGVHTTALSSALFKNGMACGACFEVQCGGKPKCPGSSVVVATNFCPPNPGQSANNNGWCNP  
PNEHFDLSYPAFVKIADPKAGAVPLQYRRVPCQKQGGIRFTINGNCNFILVTITNVGGSGVVTAAYLKGDKT  
EWSPLSRNWGANWQCRRNYCGQGISIKIVTSDNKVSVTKLAKSDWCFGKTFIGKQV

>PpEXPA6

For nucleotide sequence see Figure S6

>PpEXPA7 [AB]

MVWTVVLALMLVVAPFGSEA?S?FMAGGWGYAHATYY?GADASGTQGGGACGFNLYSTGYGTNTAALSAAL  
FNGLSCGSCYELACDPNGSKYCLPGGPTVTVTATNFCPHGSLGGWCDAPKQHFDLAHPMFVSLAREVGGVI  
PIKYRRVPCVKSGMRFTINGNPWFLLVLTNVAGAGDVQHMYIKGSNTPWEPMRNWGSMMWQFTGDSKMKG  
QALSFKAVTSDGSVAVSMDAAPGNWQFGQTFEGVNF

>PpEXPA7

ATGGTGTGGACTGTTGTCTTGGCGCTGATGCTGGTGGTGGCGCCCTTTGGATCGGAGGCGMKMAGCWAYTTC  
ATGGCGGGAGGATGGGGCTATGCCCATGCTACGTATTACGSCGGTGGCTGATGCGTCAGGAACCTCAAGGTGGG  
TCGGCGTTTGGTGAAGTGAGGAGTCCGCGTTTCTTGGCTGGCTTTTTGGTTGTCTATCTATGGACTGGTA  
GTATATTYKGGgCgAGTTSGMgCAGTCAMGWTWGGgCKGGAgTCTTGATGTCTTTCTTCACACAGAGCAGATG  
AGTTTTGATGATGGGGTTGATGGTGGTGGCTAAGGTAGCAGTCACCGCGACCATTTGGTTTTATGCCTGTGTT  
CAGTATTTGGAATGTGTGTTTCGTGTGGTTGGGATGAGGACTGGCTCATTTTGTGACCTGGTAGTCAGCGC  
CGGACCGCACAGAAGAGTGTGTCTCTTCGCACCCCTGCGAGGGCGGGTATCGGTTCTGTGGTATTTCTT  
TATGTTTTCCGTCTGTCTGCTTCTGTGAGCTCGTCGTCGAAGGATGTCAGTGTTCTCATGTGTCTTGATGCGA  
AGCTTGATTTCCGCGTTCTTTGAGCTTGATCGATTGAGCGCGTTTGCCTAGCGGCCCTTCAGTGTGTGACCC

GATCATTTCATTCGTTTTATGTGAAAATTTACTTACCATGACTGTTCTTGGCGCGGTTTTTGAATGCAAGCGG  
GGCATGTGGATTTCGGGAACCTCTACAGTACCGGTTACGGAACCAACACTGCGGCACTCAGTGTGCCTTGTT  
CAACAGTGGCCTTAGCTGCGGCTCCTGCTATGAGCTTGCTTGCACCCCAATGGCTCCAAATACTGCCTTCC  
AGGGGGGCCAACAGTACCGTTACTGCGACCAACTTCTGTCCCATGGGTCTTGGGAGGATGGTGCACGC  
TCCCAAGCAGCACTTCGACCTCGCTCACCCCATGTTTCGTGAGCCTCGCGAGAGAGGTTGGAGGCGTCATCCC  
CATCAAGTACAGAAGGTGGGCTTTCATTCTGCACCCTCTGTTGCCATCGATCTTGTGAAGACTGCTTGGATA  
TTTTGGTCATGCCGCAACAGTTCTTCTCTGATCTTGAGAACACCCGCTAGGTATCGACAGGTTACATGCT  
CATGTGTCCGAGTTACTGTTTGCAGCTCCAGGCCTTGAATGGTTCCGTTAACATTATGCCTGCCATGTTA  
CACAGAGTTCTTGCCTGAAATCCGGCGGCATGCGCTTACCATCAACGGCAACCCTTGGTTCTTGTGGTG  
CTCGTCACCAACGTTGCCGGCGCTGGGGATGTGCAGCATATGTACATCAAGGGCTCCAACACCCCTTGGGAG  
CCTATGTACGCAACTGGGGTTCAATGTGGCAGTTACCGGCGACAGCAAGATGAAGGGTCAGGCTCTCTCC  
TTCAAGGCCGTTACCAGCGACGGATCCGTGGCTGTCTCCATGGACGCTGCCCCGGAAACTGGCAGTTCGGC  
CAGACGTTTTGAAGGCGTTAACTTC

>PpEXPA8 [AB]

MAKFSAQIVVAFMVLLAQQVRAESGWNEAHATFYGGSDAGGTTGTRGGACGYGDLYSTGYGTSTVAISSALF  
DRGLACGACYQVKCAGSSSECRSDSPAIQVTVTNFCPPNPSLPEDNNGWCNLPLHHFDMSPAFEQIATYKA  
GIVPVMYRRTSCVRTGGIHFTMSGHNFMNLLVLTNVGGMGDVQSVSIRGSKTSWVTMTRNFGQIWQSTVNMS  
GQSLFSMVTTSDGKTVVSNVAPPDWAFFGQTYEGSQF

>PpEXPA8

ATGGCAAAGTTCTCAGCCCAGATTGTGGTGGCGTTCATGGTGTGTTGGCGCAACAAGTTCGTGCTGAAAGT  
GGATGGAACGAAGCTCATGCTACATTTTACGGTGGTAGCGATGCCGGTGGCACAACAGGTACTIONAGGCTCC  
ACCATAGCCGAGTCCAACTTGCAACTCGTTCACTTAACTCACTGCCCTAAGGTTGTGTAGTTAAGACATAA  
AGTGAATCTCTCCGGTTGTTCACTCAGGTGGTGCTTGCGGGTACGGAGATCTCTACAGCACTGGCTATGGCA  
CCAGCACAGTCGCCATAAGCTCAGCTCTTTTCGACCGTGGCCTCGCATGCGGTGCGTGCTACCAGGTGAAGT  
GTGCGGGGAGTTCTCCGAGTGCCGCTCTGACAGCCCAGCTATTCAAGTTACTGTCACCAACTTCTGCCCTC  
CTAATCCCTCCTTGCCTGAAGACAACGGCGGATGGTGCAACCTCCCTCTGCATCATTTCGACATGTCCATGC  
CTGCCTTCGAGCaAATCGCAACTTACAAGCCGGCATTGTGCCTGTGATGTACCGAAGGTGTGCGAGTTGTGA  
TTTTGCAGCTCATTGTGAGTTTTGGAATCCTCGAGAATTTTCCGACAGGTCGTGATTGTTAACTTGTGTGAT  
GTTTTTGAATAATTCAGGACTTCTTGTGTAAGGACTGGTGGCATTCACTTACCATGAGCGGTCACAACTTC  
ATGAACTTGGTGCTTGTACCAACGTCGGAGGCATGGGGACGTGCAATCCGTGTCCATTGAGGTTCCAAA  
ACTAGTTGGGTGACAATGACCAGGAACCTTTGGGCAGATATGGCAGAGTACCGTCAACATGAGCGGCCAGAGC

CTCTCCTTTTATGGTGACGACTAGCGACGGCAAGACTGTGGTCTCCAACAACGTAGCGCCTCCCGATTGGGCG  
TTCGGCCAAACATACGAAGGATCGCAATTC

>PpEXPA9 [AB]

MAVQAGEGGVPLLLLLVMLQWCMWMPGVKAFYGP TDWTDHATFYGGADASGTQGGCAGGACGFGNLYSTGY  
GTNTAALSQALFNGLTCGACFELVCDSSGSRVCVTSSSVVVTATNFCPTGSTGGWCDYPRQHFDLSQPVFT  
RIAQPVGGVVTLKYRRVRCQKSGGIRFTITGNPYFILVLTNVGGAGDVQQLYIKGSSTGWNAMSRNWQLW  
EIRNAALMGQALSFRVVTSDRAEVASFDAVPANWAFSQTFEGSNF

>PpEXPA9

ATGGCTGTCCAAGCTGGTGAGGGTGGTGTCCCGTTGCTACTGCTGCTAGTTATGCTACAATGGTGTATGTGG  
ATGCCAGGCGTGAAGGCATTTTTATGGGCCACGGACTGGACTGATGCCACGCGACTTTCTATGGCGGCGCA  
GATGCATCTGGAACTCAAGGTGGATGTGCGGGCATTGCTGAGTCCCGGAATTGAAtGTCGTCGTCTTGTGG  
TTTTGTGTTTCGACACTATGGTGTGTCGTGGATTTTCGCTCGCTCGTATCTGTAGTTTTTTTTTGTACAAC  
CATGAGGAAGSCGGTCAATTCGGGAAGCTTTCTGCTGTCAGGTTGGGGACGTCGTACATTGTATCTTTGGGT  
GTTGTGAATAATCTTGCAGTGGTTGGTCTGAGTTTGTTTCATGGCAGAAAATTGATTGAGGAAGAAAATT  
TGTTGCTTGATGATTCGTCTGGAATGCAATGCGTCGACTTCTATGTCAAGTGTGAGGTGTTCCCTCAGGTTG  
AAGCGCTACATTCTTGAAGAGCAAGGCCGATGCTTAGCTTGTAGCCATTGATATATTTTTGCCTAGCGCATT  
ACGACCTTTGCTGCTTCGCGCATATAGACTCTGCCGCTCGAGTAGACAATTCCGTCTCCTGGTCGTCCATGA  
TTTTGTGATCCGATTCTTTTTTCCATTGACGACGTATCTCCTCACGCAATTTGATGCACAGGTGGAGCTTGC  
GGATTTGGCAATCTTTACAGCACAGGCTACGGCACTAACACGGCAGCATTGAGCCAGGCGCTTTTTCAACTCG  
GGCCTCACTTGCGGCGCCTGCTTCGAACTCGTCTGCGACTCCAGTGGCTCCAGGTACTGTGTCACCAGCTCG  
TCTGTGGTTGTCACTGCCACCAACTTCTGCCCCACTGGCTCGACTGGAGGATGGTGCATTACCCAGGCAG  
CACTTCGACCTCTCCAGCCCGTCTTACCAGAATCGCTCAACCAGTGGGCGGCGTCGTACCCCTAAAATAC  
AGGAGGTAACTTTGCCTTTTTATTCTGTGATCATCCCCTCTTTGCAAATTTCTCTAGCACACGAAACCGG  
TAGCTATGCACAGGAAGTTTTGATGGGGAACGATGTTATCATGTTCATAGAGGTATCTACATACCTCCAGA  
AATTCACCACGTATGAATCTGAAAACGTTTTGCTAAGAATTCTCACGGTAAGATTCTTCATCTCCTCCTTGA  
TACAACGAAGTGAAGCACCAAATGCTGACTTGCGAAATTGCTCACAGAGTGCATGCCAGAAGAGTGGGGGT  
ATCCGCTTACCATCACCAGGAATCCCTACTTCACTTCTGTTTCTCGTTACGAACGTTGGCGGCGCCGGGGAT  
GTCCAGCAGCTCTACATAAAGGGTTCTTCCACGGGCTGGAATGCCATGTGCGGCAACTGGGGACAGCTATGG  
GAGATCCGCAACGCTGCGCTCATGGGACAGGCGCTGTCTTCAGGTTGTCACTAGCGACCGTGCAGAAGTG  
GCCTCTTTGACGCGAGTGCCGGCGAATTGGGCATTCTCGCAGACTTTCGAAGGCAGCAATTTT

>PpEXPA10 [A]

MAMVRGNAFAAVLTLVVALDLVARVMLVQASSYLGTNWVSGRAHATFYGGADASGTQGGACGYGNLYSTGYG  
TSTAALSSALFNGLSCGACYELTCDTSGSKYCLPGNPSIILTATNYCPQNSNGGWCDAKQHFDLAHPMFV  
SLAEERGGVIVPNYRRVPCAKKGGMRFMQMNPNWFLLVLTNVGGAGDVQQLSIKGSNSGWYQMKRNWQMW  
QLTGNMMPGQALSFRVLSDGTTVESLDAAPANWHFGQMFEGSQA

>PpEXPA10

ATGGCGATGGTGCCTGGCAATGCTTTTGCAGCCGTTCTGACGCTTGTGGTGGCTTTGGATCTGGTGCACGC  
GTGATGCTGGTCCAGGCTAGCAGTTATCTTGAACCAACTGGGTGAGCGGCAGGGCACATGCCACGTTCTAC  
GGCGGTGCTGATGCCTCTGGCACTCAAGGTGTGGATCGAAGCATCATGTCTGTCACCATGAACTTTGGGAT  
TTCCAAGTGTGGCTTTAGATGCAGGATGAATTAGTGTGCTCGTCTGCGTGAAGTCGAGGAATTACCTAATT  
GCATTTTACCAACTTAAATGTTAACAAGCCTCAATCTATAGACTCCAACCTGGCTTCTGATTAGAACCTG  
CATTGTGCTCCAAACCGAAATTGAAATCAAAGTGTACAGACTGAGATGCTTCATTAGTTGTCAAGATTGAC  
TTCGATCCTTAGGAAACATCAAATTGAATCACGATTGAAAGTCGAGTCTTAGTAACCAAGATTGATGCAGCG  
ACATTAGCATGGAACCTTGAGCTCTTTACcTTGTATCTGAACCCAGCGGACATgGcTTCTGTTGCCTCCACA  
CACAGCTGTTTATCTAATAACGAAAGCTTTTTTGCGAATGCAGGTGGTGCCTGTGGATATGGAAATCTCTAC  
TCGACTGGATATGGAACCAGCACTGCCGCTCTTAGTTCGGCGCTATTCAACAGTGGCCTCTCTTGCGGCGCA  
TGCTATGAACTCACCTGTGATACCTCTGGCTCCAAGTACTGCCTTCCCGGAAATCCATCCATCATTCTGACA  
GCCACTAACTACTGCCCTCAGAACTCCAACGGCGGATGGTGCAGCGCTCCAAGCAGCATTTCGACCTTGCA  
CATCCCATGTTTGTGTCTCTCGCGGAGGAGCGTGGCGGTGTTATCCCTGTCAATTACAGAAGAGTCCCTTGC  
GCGAAGAAAGGTGGCATGAGGTTCCAAATGAATGGAAACCCCTGGTTTTTGTGTTCTCGTGACCAACGTC  
GGCGGGGCAGGCGATGTGCAACAGCTCTCCATCAAGGGCTCAAACCTCGGGCTGGTACCAAATGAAACGCAAT  
TGGGGACAGATGTGGCAGCTGACGGGAAACAGCAACATGCCGGGACAAGCTCTCTCTTTTCAGAGCTGTCCTT  
AGCGACGGCACAACAGTGGAGTCCTTGGACGCTGCCCCAGCTAACTGGCATTTCGGCCAAATGTTTGGAGGA  
AGCCAGGCA

>PpEXPA11 [AB]

METWRSHAAALEAML L L L L L L T M M M I D V P V S V E A A S A T G S R F R G G L N W G R A H A T Y Y G G A D A S G T Q G G A C G F G N  
L Y S S G Y G T D T A A L S S A L F N S G L S C G A C Y E L T C D P S G S K F C I P G G S A I I T V T N F C P T G S N G G W C N P P K Q H F D L  
A Q P V F R K I A R T V G G V P I N Y R R V S C L K D G G M R F T V N G N P Y F L L V L V T N V G G A D V Q Q L Y M K S S T N W Q P L K R  
N W G Q M W Q F T G N S R M H G Q A I S F K A V T S D G S V A V S N N V A P P N W G F G Q T F

>PpEXPA11

ATGGAGACGTGGAGGAGTCATGCTGCTGCATTGGAAGCCATGTTGTTGTTGTTGCTGACGATGATGATGATA  
GATGTGCCGGTCTCTGTGGAGGCTGCTTCTGCGACGGGGAGTCGCTTTAGGGGGGGTGGTTTGAATTGGGGC  
CGAGCTCACGCCACTTACTATGGCGGGGCTGATGCTTCCGGCACCCAAGGTGGGTATCCATCCACACCGCT

CCTCCAGGCTCCGTTTCTTGGTTGTGGTTCCAGTATTGTAGTGAGTGGGTCTCATCAGATTGCTATACAGTT  
TTCGAACAACAAATAAAAACCAGATCTGTTGTGTCTTGGCTGCTTGTATGGGATTACCCCTTTGTTGGAGTT  
GTAAAGACGGACGTGTGCAACATGAATGCTTCTCGAAGTTTAAAGATGAGGAGCACAAGCGGGCTGGAGTCGT  
TAGGAGTTTGGCAGTGTAGCTGTAGTTATTAGTCACTTCATGGTCTTTAGCGTTCGTTGTTTGGCAGTTGTT  
TTCAAGCTTTGTTGTGCTTTTTAGCTTTCTTTGcCAcCACTATGaAAGTTCCATGTCTCCTGTGATTAATGG  
GGGTCTTGGAAGTTTTTCGAAGCTCAGGTTGTCGGTTTTtGtTTTTTTTTTTTTCTCAGGGTATGttGGCTCG  
TCATCGtCAGTTGTGTGGCAttACMGTtGSTcCACAtTTTGGAGTGTGGTtCCTTKRAYCKGTaTaCGTYCa  
TTCTTTcCCCGTTGAGTTCAGCATTtGTAATTTTTGCGTGTACGTTTAAGTCTGCAGGGGGCGCGTGTGGAT  
TCGGAAACCTCTACAGCTCCGGCTATGGCACTGACACTGCGGCGCTGAGTTCGCTTTTATTCAACAGCGGAC  
TCAGCTGTGGAGCATGCTACGAGCTTACTTGTGACCCAGTGGTTCCAAGTTCTGTATCCCTGGAGGATCAG  
CAATCATCACCGTGACCAACTTCTGCCCCACCGGTTCCAATGGAGGCTGGTGCAATCCTCCGAAGCAGCACT  
TTGACTTGGCCCAGCCCGTATTcAGGAAGATCGCTCGAACAGTTGGTGGCGTCGTCCCAATCAACTACAGGA  
GGTACATCACGTTCCATAAACTGTGGTCGGAActATCTTCTAGTCTAGAAGCACTGCCTGCGATATGTCCA  
ACCAGAGCAGTGCCTGTTAATCGTCACGCATTGCCCTGTcATTcGCCGTAGTTTTCTTAAACACCACCTCTGA  
TGCGGCTCGAAGTTGGAATtATTTGGCAGAGTGTCTTGCTTGAAAGATGGAGGCATGAGATTcACCGTCAAC  
GGCAACCCTTACTTCTTGCTGGTACTTGTCAccaAtgTCggAggAGCCGGTgATgTCCAACAACtGTACATG  
AAGGGATCGAGCACCAACTGGCAACCCTTAAAGCGCAACTGGGGCCAGATGTGGCAGTTCACCGGCAACAGC  
AGAATGCACGGCCAAGCCATCTCCTTCAAGGCTGTcACAAGCGACGGTCTGTcGCGGTATCCAACAACGTA  
GCCCCACCCAActGGGGCTTTGGCCAGACCTTCGARGGSWYC

>PpEXPA12 [AB]

MALRARQSSVLEVVVLVIMFGCVRMEGVEAWSGPNGWNDHAHATYYGGADASGGACGFNLYSTGYGTSTAAL  
SQALFNsGLTCGACFELACDPSGSKYCYKGSsIVVTATNFCPSGSEGGWCDSPKQHFDLSQPvFNKIAQQAG  
GVIPVKYRRVPCRKSGMRFTINGNPYFILVLTNVGGAGDVQQLSLKGSSTGWYtMSRNWQQWEFrgNSA  
LVGQALSFRVVTSDGAEAVSYDAAsENWSFSQTFEGINF

>PpEXPA12

ATGGCTCTCCGAGCTCGTCAGAGCAGTGTGTTGGAGGTGGTGGTGTGGTCATCATGTTCCGGTGTGTGCGG  
ATGGAGGGCGTGGAGGCATGGTCTGGGCCAAATGGCTGGAATGACGCCCATGCAACCTACTACGGCGGCGCG  
GATGCTTCCGGCACTCAAGGTTGGTGCAGAGATGTTGAAAGTTGTGATCGGAGGGAGGATTGCAATGTGATC  
TCGtAGAATCCGCCTCGCTCAGACTGTAGGTGTGGTTACGGTTTTCCGGGAGTGTGGTCTGTGTTCCGGCGT  
CGAAGGGGTGAGGTTAGGCGTTGTGGTTCATTGTGTGGAATGCCGGATGTACCTGTGTGTACGCATTCCAGT  
GTATGAATTTTTCGTCAGGAGGGAGCCGCATCAGTGCACAGCGAAAGATGATTTGAAAATCAAACGTTTTTAA  
AGGAATTCATTcGGCTGCGCGCTTGACATTGACAATTCATGTcGAGCACGACATTTTTCTGGCGATTGGAG

TTCTCAGCGATATTCTCTCCATGGATTTTTTTGAGTTGCAGTGTAGTTTTTCGTGTTGGCAATGATAAGTGCA  
GCAGCTGCGCTCACGTAAATTGATCGGAACAGCAAATTGAGTCTTCTAATCCGTGAGGTGATTGCTTGCCT  
CATCGATCGATTTTTCTCGTGCAA<sup>t</sup>TTTTTCGTGCAAGGTGGAGCTTGCAGATTTGGCAATCTTTATAGCACAGG  
CTACGGCACCAGCACGGCGGCTCTTAGCCAGGCGCTTTTTAATTCGGGCCTCACGTGTGGAGCCTGCTTCGA  
GCTCGCATGCGATCCTAGCGGTTCCAAGTATTGTTATAAAGGTTCTTCTATTGTGCTCACTGCCACCAACTT  
CTGTCTTTCGGGTTCCGAAGGAGGATGGTGCATTCCCCGAAGCAACACTTCGACCTCTCACAGCCCCTCTT  
TAACAAAATCGCTCAACAAGCTGGCGGTGTCATCCCTGTGAAATATAGAAGGTAGATTGCTTCCCTCCATTC  
TTGTGACCATTCCCTCTTTGGA<sup>ACT</sup>CCTCTACACGAAACAATCGTCTGTTTCATAATTTATGACTAAAGGCT  
GACAGTTTCATGGATTTCGTCCACAGAGTGCCATGCCGGAAGTCCGGAGGCATGCGTTTTTACCATCAATGGAA  
ATCCCTACTTCATTTTTGGTGTCTCGTCACGAACGTCCGGCGGAGCTGGCGACGTTTCCAGCAGCTTTCTCTCAAGG  
GCTCAAGCACTGGCTGGTATACCATGTGCGCAACTGGGGACAGCAATGGGAGTTCGCGGGGAATAGCGCGC  
TCGTTGGACAGGCACTCTCCTTCAGGGTGTACCAGCGATGGCGCAGAAGCAGTCTCCTACGATGCGGCTT  
CAGAGA<sup>ACT</sup>GGAGTTTTCTCGCAGACGTTTCAAGGAATCAATTTT

>PpEXPA13 [AB]

MTRYVAHIAVMVMAFLMVRDACSLSEWNEARATFYGGSDAGGTTGGACGYGDLYSTGYGTNTVATSSAIFDR  
GLACGACYQVKCAGSASECQPGTPAIQVTVTNFCPPNPSLPEGNGGWCNLPLHHFDMAMPAFQQIASYRVGI  
VPILYRRASCVRTGGIRFTMSGHKFMNLVLVTNVGGMGDVQTVFIQGSKTKLVAMIRNFGQIWQSSVNVSGQ  
RLSFMVMTSDGESVVS<sup>RNV</sup>APSDWAYGQTYEGSQF

>PpEXPA13

ATGACGAGGTACGTAGCTCACATTGCGGTGATGGTTATGGCGTTCTTGATGGTTCGGGATGCTTGTCTCTG  
AGCGAGTGGAACGAGGCTCGTGCTACGTTCTATGGCGGCAGCGACGCCGGTGGAACGACAGGTACTTGGAAG  
GGTTGACGGTGCCACACCTCATTGAGCTCGAATGCATAATGACCGAGAGTTGCTTTTTGTTTCTGTAAAATT  
AGATCACGACCAGGTTATTCAATGCTCATCGATCTTGCCAATTTGGCTTGTAGGAGGTGCATGTGGCTACGG  
AGATCTGTACAGCACTGGCTATGGCACCAACACGGTTGCCACAAGCTCCGCTATCTTCGACCGAGGCCTTGC  
TTGCGGCGCTTGTtACCAGGTTAAGTGCCTGGTAGCGCATCCGAGTGCCAACCTGGCACCCCCGCAATTCA  
AGTTACCGTGACCAACTTCTGTCTCTAATCCTTCCCTGCCTGAAGGCAACGGCGGCTGGTGTAACTCCC  
GCTGCACCATTTGACATGGCCATGCCGGCATTTCACAAAATTGCTTCTTACAGAGTTGGCATTGTGCCTAT  
CTTATACCGAAGGTATGTGATCACTACCACCTCCATTCGCTCATCGACTGTTGCGAGTTTTCTTATGCGTGCT  
ACTTTGTTCTGAAATCATTACGAATTTTGTTCAGAGCTTCGTGCGTGAGGACAGGCGGCATCCGCTTCA  
CTATGAGCGGACACAAATTTATGAACCTCGTGCTCGTACCAACGTGGGTGGTATGGGGGACGTCCAAACTG  
TGTTCAATTCAGGGGTCTAAGACGAAGTTGGTGGCCATGATCCGGA<sup>ACT</sup>TTGGCCAGATATGGCAGAGCTCCG

TGAACGTGAGCGGTGACAGACTCTCCTTCATGGTCATGACCAGCGATGGCGAGAGTGTAGTCTCCAGAAATG  
TGGCGCCTTCGGATTGGGCATATGGTCAGACATATGAAGGTTACAGTTC

>PpEXPA14 [AB]

MTQVIRLTMVPSVAVALLVMLCGCVSQAAGYGPGGWDKGHATYYGEGDARGTMGGACGYSNLYSTGYGVNT  
AALSGPLFNGGATCGACYELTCILNESKWCYRGKNIIVTATNFCPSGSTGGWCNPPQKHFDLSEPMFTTLAN  
RVGGVIVPNFRRVACYKQGGMRFTINGNPYFFIVLVYNVAGAGDVQQVYIKGPKTQWLQMYRNWGSQWTFNG  
GPNNIVGSALSFRVHTSDGRQVISY?AAPANWWFG?TFSSGAN

>PpEXPA14

ATGACGCAGGTGATCCGGCTGACGATGGTGCCGTCCCCGGTGGCGGTTGCTCTGCTCGTGATGCTGTGCGGG  
TGCGTTTTCGCAGGCGGCTGGTTACGGCCCTGGTGGATGGGACAAAGGTCACGCAACGTACTIONATGGGGAAGGG  
GATGCACGCGGCACCATGGGTACGTAATCTTCTCGATCTTTTCAGCTGGAATGTGTGCGCTTGCTTGGTGCC  
AATCTGTGCAGCAGCAGCAGCCTTCATGGTTGTATAATTCATCTCAGGCGAGTGAGCAAGCGAGCGAGGGTT  
TCTCGATGTGATATAGTTTTGTGCCAGTCTCTGTCTGCAGCCGATCAGGATGTAGTTGATGCAGAATTGACC  
GGAcGCAtTCAAGCTCGTTACAGTGGACTGGGAATGGgCTGATTcAGAAAATTCGTGATGAAATTGCATGAA  
CATATTAGGATTGGTCAGCTGATTATTTTTGAGGATCTGCCCATCTTAAACCCAGACAGTATCCTCATGAT  
TCCTACATTTGAGAAGATTGTTGGGAAATCATTTTTGGTTGACATCAGTTGTGCATTTGTTGACACAATGTGC  
AGGAGGTGCTTGCGGGTATAGTAATTTATACAGTACCGGTTACGGTGTCAACACTGCTGCTCTGAGTGGGCC  
GCTATTCAACGGTGGAGCCACTTGCGGAGCATGCTACGAGCTGACCTGCATTCTCAACGAATCCAAATGGTG  
CTACAGAGGCAAGAATATTATAGTCACGGCCACCAACTTCTGTCCCTCGGGATCCACGGGAGGGTGGTGCAA  
CCCACCCAGAAGCACTTTGACCTATCCGAGCCCATGTTACCACACTTGCTAACAGAGTCGGAGGCGTCAT  
TCCTGTCAACTTtCGAAGGTACTGCAaTCTCCTCGTTGCACCGAaTGTTTTCAAGtTGATCCAATTACGCTC  
CGCAaGcAGaATGAGCCCGTgCCACaAACaCataaTGTCcCATCGGTTGTATTTTTGTGATGCAGGGTGGCG  
TGTTACAAGCAAGGAGGGATGCGCTTACCATCAACGGAAACCCCTACTTTTTTATCGTGCTCGTTTACAAC  
GTAGCGGGCGCTGGCGACGTGCAACAGGTGTATATCAAGGGCCCCAAGACGCAATGGTTGCAAATGTACCGC  
AACTGGGGGTCTCAGTGGACATTCAATGGGGGGCCCAATAACATAGTCGGGAGTGCGCTCTCCTTCCGAGTT  
CATRCCAGCGACgGCCGCCAAGTGATCTCCTACAAYGCGGCCCCWCGAACTGGTgGTTCCGCCAMACTTTC  
AGCAGTGGCGCTAAT

>PpEXPA15 [AB]

MVWTLALMLVTSFRVEARSDFMAGGWYAHATYYGGADASGTQGGGACGFNLYSTGYGTNTAALSALFN  
SGLSCGSCYELACDPNGSKYCLPGGRTVTVTATNFCPHGSLGGWCDSPKQHFDLAHPMFVTLAKEVGGVPIPI  
KFRRVPCVKSGMHFTINGNPWFLLVLTNVAGAGDLQVYIKSNTPWEPMSRNWGSMMWQFTGNSKMKGQA  
LSFKTITSDGAVAISYDAAPNNWQFGQTFEGVNF

>PpEXPA15

ATGGTGTGGACTCTCTTGGCGTTGATGTTGGTGACGTCTTTTCGAGTGGAGGCCCGAAGTGAATTCATGGCG  
GGGGGTTSSGGGataCgCCCMCKCSASKTaCKACGGYRKMGMTgAWGCKTSAKGGACTCAAGGTGGGTTGGCG  
CAGTATTGCTGCGGAGGACCTCGTGTTTCATGGCATGCCATTGTCATTTAAGAGCCATGGCATCTTTGTAGA  
GTTTGTGCTTAGACAGGTTTTGGGAGCCTTTTGACGCCTTCTCTTCGAAAGCAGCTCAGTGTAATGGCCTTT  
TTCTTTTTTTTCTTTTTTTTTGCGGTAGCTACGATCCTTGTTCATCGTCCAAATGGCAATGTGTCTGATTACGA  
ACGTGCTTTTCATGAGCGTGGTCACATTCCTTTGATCTTGCAGTTAGTGCAAGTCCCCACATACGACGTTATC  
ACTTCTTACCCCTGAGGAGTCGTGCTCGGTCCACGTCTTGCATCTTTCTTCGTAGTTTTTTTTTTTTTTTTTT  
TTTTTTTTTTGTTTTTTTTTTACTTTAGTATGGACTGTCCGGTCTGAAGAGGTCGGTAGAGTTCCTACGGAAT  
GCACCTCGTTGTATTAAGAGGAGCTCGAATCTGACCTTTTCGAGCGGCTTCCTCTGATGGTGCCTCTCTGCC  
CTTCCCCCGCCGGAGTGCAGGTTCTGGGTTCACTCTTTCTAACTTTCTTGGCACGGTTCTTGAATGCAGGT  
GGGGCTTGTGGATTTGGGAATCTCTACAGCACTGGCTACGGAACCAACACCGCGGCACTCAGTGCAGCCTTG  
TTTAACAGCGGCCTCAGCTGCGGTTCTTGCTACGAGCTCGCCTGCGATCCCAATGGCTCCAAGTACTGTCTT  
CCAGGTGGCCGAACCTGTCACGGTGACGGCAACTAATTCTGTCTCATGGTTCCTTGGGAGGATGGTGCAT  
TCCCCAAGCAGCATTTCGACCTCGCTCACCCCATGTTTCGTCACTCTTGCGAAGGAGGTCGGAGGCGTCATA  
CCTATCAAGTTCAGAAGGTAAGCTATTGCTCCGAACTCGCAATTCATGTATCGGCTTTTCAAGTCTTACGC  
TTTCCATGTCGTGCACTCACTCCAAAATGTTTCTTCTAGCAGCAATGACGCAAGAAGAGAATAGATAACATT  
TGTTAATTCAGTTTTAAATGAACAAATGAAAATTTGAAAAGTTTACCTGTATTTTATTTTAGTTTATCTTA  
TTCTGTCTGCCTTCTTATATGTGTGTGTGTATGTGAGCCTATGGTTAGATCCTAAcATCaTGTGTTGCTC  
ATGTTGCAGAGTTCCTTGCCTGAAGTCCGGCGGCATGCATTTACCATTAAACGGCAATCCTTGGTTCCTGCT  
GGTGTCTGTAACCAACGTTGCCGGTGCCGGAGACTTGCAACAGGTGTATATCAAGGGGTCTAACACTCCCTG  
GGAGCCAATGTCCCGCAACTGGGGATCAATGTGGCAGTTCACTGGCAATAGCAAGATGAAGGGACAGGCTCT  
GTCGTTTTAAGACCATTACCAGCGACGGAGCTGTGGCCATTTCTTACGACGCTGCCCCAATAACTGGCAGTT  
CGGCCAGACATTTGAAGGCGTCAATTTT

>PpEXPA16 [AB]

MTMAQRNPKMVSARVAAALFVILAGCISQALAVYGPGRWDTAHATYYGGRDAGGTMGGACGYGNLYNTGYGV  
KTAALSAPLFLKGGATCGACYELTCILSQSKYCYQNKILITATNFCPTGSTGGWCNPPRKHFDLSEPMFTTL  
ANRVGGVIVPNFRRVHCYKKGMRFTINGNPYHMMVLVYNVAGAGDVQQMFIKSPPTGWLQMSRNWQIWTY  
KGGPRNIVGFALSFRVYTSDRRQVVSYNAPANWRFGQTFSSGAN

>PpEXPA16

ATGACAATGGCGCAGAGGAATCCTAAGATGGTGTGTCAGCTCGAGTGGCAGCTGCGCTGTTTCGTGATTCTGGCG  
GGGTGCATTTTCGCAAGCACTGGCTGTGTATGGTCCAGGTAGATGGGATACAGCTCATGCGACATACTATGGA



GGCAGGGATGCGGGCGGCACAATGGGTACGTTATCTTTCTTGTGACAAAATGTGTTTTGAGCTTAACATCTGG  
TGCTGCACGATGTCGGTGAATTGTCTGAACAAGCAACACATGTCATCTCATGTAGGCGACCGAGACGGTCT  
TGATGTAGCAACGTTTTGTGTAAATCGCTGTACATCGTCAATCAGAATGTTGTCCCATTACTGGACGCATCT  
CTTGAAGCTTGTATAGTGTAGTAGGATACAACCAATAGCGAATAAGTGGTTTTCCGTAAATTCAAGCAAGAT  
TGCAGCAATTTATAAGGATTGATGAGCTGACTGGACCTTGAGAATATGCATCTCGCATATCCACGTAGTTCC  
TCGTTTCGGAAAGAATGTTTCAGTGGCCACTTTAGTTGACAACATCTATTATTGGATTGAATGTGCAAGGAGGT  
GCTTGCGGGTATGGGAATTTATATAACACTGGTTACGGTGTtaAAACGGCCGCCCTGAGTGCGCCGCTCTTC  
AAAGGTGGAGCCACATGTGGAGCATGCTACGAGCTCACTTGCATTCTCAGCCAATCCAAATATTGCTACCAG  
AATAAGAAGATTTAATCACGGCAACAACTTTTGTCCCACAGGATCCACGGGAGGGTGGTGAATCCTCCC  
CGAAAGCACTTCGACCTTTTCAGAGCCCATGTTTACCACCCTGGCAAACAGAGTCGGAGGCGTCATCCCTGTC  
AACTTCCGAAGGTACTGCATTGATCCCCGTTCTTGCATCATTGCTCTCACCTAGTTTTCTCGGGCTCTGC  
AACCGAAGGATGAACCTGTCAACACTGCAGTGAATAATGTTTCTCTTGTAAATTCAGGGTGCATTGTTACA  
AGAAAGGAGGGATGCGCTTACCATCAACGGGAACCCCTACCACATGATGGTACTCGTCTACAACGTAGCAG  
GCGCCGGCGACGTTCAACAGATGTTTCAAGAGCCCACGACAGGGTGGCTCCAAATGTCGCGCAACTGGG  
GCCAGATTTGGACATACAAAGGGGGCCCCCGGAACATAGTTGGCTTTGCCCTCTCCTTCCGAGTATATACCA  
GCGACCGCCGGCAAGTGGTATCTTACAATGCGGCCCTGCGAATTGGAGGTTTGGCCAGACCTTCAGCAGTG  
GtGCCAAC

>PpEXPA17 [AB]

M?GVE?K?SRFTGSDWGRAHATYYGGADASGTQGGACGFNLYSSGYGTSTAALSSSLFNGLSCGACYELT  
CDPSGSQYCLPGGSAIITVTNFCPTGSNGWCNPPRQHFDLAQPVFSKIARTVGGVPIPINYRRVSCLKSGGM  
RFTVNGNPFYLLVLVTNVGGAGDVQQLYIKGSSTAWLPLKRNWGMWQFTGNSGMHQAI SFKAVTSDGAEA  
ISNNVASSNWGFGQTFEGSNF

>PpEXPA17

ATGnCCGGCgtGGaGYCGaAGKSGAGtAGGTTTTACGGGCAGCGACTGGGGCAGAGCCCATGCCACTTACTAT  
GGTGGAGCTGACGCCTCCGGTACTCAAGGTGGGTGCCACTTTAATCCTCCAGTTATCGATGTTTTCAAAATGT  
AGTCCCTCTGTAAATCTTCTCAGAAATGCGGTTCCGCCCGCCATGGTGGCTGCGTTTTGCAAGGGGTGCGA  
GTTGTGACTGTAGTTCACAAGGAATGCGGGTCATAGCTGGGTGCCACCCACATTGTAGACTGATTTTCGATG  
CTCAACTAAACAATTTCTCAACTTTGTGTGCGGGCGTATGGAAGTTACGATTGAGCCATTGTTACAGAGTTGA  
GGTTCACCTGTGGGAGTGGGCCGTTTGTGAACTTCCCGCACATTTTCTTGATCGCTCCCTTCGTGTCAAGTG  
AATACGTATTGCTACCCTACACGTGGGACGCAATCGATTCTAAAAGCTGTGTATCGGTTTTGTAAGTGTAG  
GCGGAGCTTGTGGATTTGGCAATCTCTACAGCAGCGGCTATGGTACCAGCACTGCTGCTCTGAGTTTCGTCTT  
TGTTCAATAGCGGTCTCAGCTGTGGAGCGTGCTACGAGCTCACCTGTGACCCGTCTGGGTCCCAGTACTGCC

TCCCAGGAGGTTCCGCTATTATTACTGTTACCAACTTCTGTCTACCGGTTCTAACGGAGGCTGGTGCAACC  
CACCCAGGCAGCACTTCGACTTGGCGCAACCTGTCTTCAGCAAGATTGCGCGCACAGTGGGCGGCGTCATTC  
CCATCAATTATAGAAGGTAGACTTGGGCTGTTGGTCTCTAACTTGAGCCAGTGATGGTCTCTTCCAGTTTG  
GCTTCTAGGTATAATACCTGTAAGCCATTGTATTAAGATATTCTTTTGTtATCACTTGATTGGCAGAGTGTC  
CTGCCTCAAGTCTGGAGGCATGAGGTTACGGTTAATGGCAACCCCTACTTCCTGCTAGTGCTCGTCACCAA  
CGTCGGAGGCGCTGGCGACGTGCAGCAATTGTATATTAAGGGCTCCAGCACCGCCTGGCTACCCCTAAAGCG  
CAACTGGGGGCAAATGTGGCAGTTCACGGGCAACAGCGGAATGCACGGCCAAGCGATCTCGTTCAAAGCCGT  
CACCAGTGATGGCGCCGAGGCCATTTCAAACAATGTGGCTTCATCCAACCTGGGGCTTCGGGCAGACCTTCGA  
GGGGTCGAACTTTTGACGGGGTTCATCCCTCCGTTTCAATTTTCT

>PpEXPA18 [none]

MKVAACIGMAALMALSVLPCVVGAPYGWNEAHITYYGTANGGGTQGGACGYPNTFAMGYGAMTAALSYPFLFQ  
GGKACGGCYQLRCKWVTPTRTVHNWCWSYSRTITVTATNSCPPGSHGGWCNWRPHFDLPMPAFLTLARREGG  
VAPVYYRKVR?AKRGGIRFTIGGNPYFLMILIHNVGGAGDLKAVKVRGGNGYWVPMWRNWALWTCCKTRMSG  
ALSFQITTDGRTLTTYKAVGGYWRFGQTWEQSQFR

>PpEXPA18

ATGAAGGTGCGCAGCTTGCATTGGCATGGCCGCTTGATGGCGCTGAGCGTCCTGCCTTGGGTGGGAGCG  
CCGTACGGGTGGAACGAGGCGCACATCACGTACTATGGAACAGCTAATGGCGGGGGCACGCAGGGAGGCGCC  
TGCGGGTATCCGAACACCTTTGCGATGGGATACGGGGCGATGACCGCAGCGTTGAGTTATCCTCTGTTCCAG  
GGGGAAAGGCATGCGGCGGGTGCTATCAGTTGCGGTGCAAGTGGGTGACGCCAACCCGAACCGTGCACAAC  
TGGTGCTGGAGCTACTCTCGCACCATCACCGTGACCGCAACAACTCGTGCCCTCCAGGGTTCGCACGGAGGT  
TGGTGCAACTGGAGACCTCACTTCGACTTGCCAATGCCTGCTTTTCTGACGCTGGCACGGCGTGAGGGAGGA  
GTGGCTCCGGTGTATTACAGGAAGGTCCGGTGYGCGAAGCGCGGCGGAATTCGGTTCACCATCGGAGGCAAC  
CCGTACTTCTTGATGATCCTGATTCACAACGTGGGAGGGGCGGGCGATTTGAAGGCAGTGAAGGTCAGGGGA  
GGAAACGGATATTGGGTGCCCATGTGGCGCAACTGGGGCGCGCTGTGGACATGCAAAACGAGGATGAGCGGA  
GCACTGTCTTTCCAGATTACGACGGGCGACGGGCGCACTTTGACGACTTACAAAGCCGTGGGCGGGTACTGG  
AGGTTTCGGACAGACCTGGGAAGGATCCAGTTCAGG

>PpEXPA19 [B]

MKMSNLKLVVFLALGLTTVIAAPRGWDAHITYYSPNGAGTEGGACGYQNTYKLGYSMTAALSSRLFQ  
GKACGGCYQLRCAPNRGRNWCWSYARAIIVVTATNLCPQSGHGGWCOPYKSHFDLPMPAFTSLARREGGVAPV  
WYRKVRCARGGVRFITIGGNPWFLMVLIHNVGGAGDVSVKVKCPYTGWVSAYRNWGCLWTVRTRKMTGPLSF  
TLVTS DGRTLYSMNAVRNGWKFGQTWEQSQFR

>PpEXPA19

ATGAAGATGTCCAACCTTGAAGCTCGTTGTGCTGTTTTCTTGCCTGGGTCTGACCACGGTGATCGCGGCGCCG  
CGGGGTTGGGGTGATGCTCATATCACGTAATGGCTCTCCCAACGGCGCTGGAACGGAGGGCGGCGCCTGC  
GGGTACCAGAATACCTACAAGCTGGGGTATGGGTCaATGACTGCCGCTTGGAGCTCTCGTCTATTCCAGGGC  
GGGAAGGCGTGCGGCGGATGTTACCAGCTGAGGTGCGCACCAAATCGTGGCAGGAACTGGTGCTGGAGTTAC  
GCCAGGGCCATTGTGGTGACTGccAYCAASCTgTRYCSRYASSGTtCGaCMTSGWGGGtGGtGCSMKtAtCC  
cAaGtCGCACTTCGACTTGCCGATGCCGCTTTCACTAGCCTTGC GCGGCGGAAGGAGGTGTTGCCCCAGT  
GTGGTACAGGAAGTAAGTAGCGCCACTGTGGAGACATTGTATGAGAAGGTGGTTGCGAGGAGTGTCTGGAG  
AAATGTGTGGTGGACTGCGGATTGTGAATGAGACGTGGATGACATGTGGGTGGGAAGAGGGGATTGAGTCGG  
ATGAGCGGTAGATGGTAACAGGATGTGTGGGTTGAATGTGATGATGACAGGGTCCGGTGTGCGAAGCGCGGT  
GGGGTGCGGTTCACCATTGGAGGCAACCCATGGTTCTTGATGGTGCTGATTCACAACGTGGGCGGAGCAGGG  
GATGTGGTGTGCGTGAAGGTCAAGTGCCCATACACGGGATGGGTATCAGCGTACCGGAACTGGGGATGCCTG  
TGGACGGTGAGGACGAAGATGACGGGACCCTGTCTTTACGTTGGTGACGAGCGATGGGCGAACGCTGTAC  
TCGATGAATGCAGTACGGAACGGATGGAAATTTGGGCAGACGTGGGAGGGCAGCCAGTTCAGA

>PpEXPA20 [B]

MKMNATYSLKLATVVTVLLSVLSVSRGAPYGWKDAHITYYGSPNGGGTQGGAYQNTYALGY\*PLTAALSSP  
LFQGGAAACESCYQLKCALVRAS\*IARNWCWNYFRTIVVTATNLCPRGSHGGWCDYRPHFDLMPAFTALARR  
EGGVAPVIFYRRVKCVKRGVRFITIGGNPYFTMILIDNVGGAGDIRSMRVKGQYGGWVNI FRNWGSIRTCRTK  
VAGALSFMITTTDGRSIVSNRAANVGGLPVQIVPLGPIAILSLSRKGPFRSKLNDAPRTLMLCLQEWVPRPRE  
ADRSPRRSRRPAASLHILSVW

>PpEXPA20

ATGAAGATGAATGCTACGTATAGCTTAAAGCTTGCTACTGTGTAACCGTGCTTCTGTCTGTGAGCTTGAGT  
TCCGTGCGTGGAGCTCCGTATGGATGGAAGGATGCACACATCACCTACTACGGATCACCTAATGGTGGTGGGA  
ACGCAGGGGGGGCGCGTATCAAATAACATACGCCCTCGGGTATTGACCCTTGACTGCGGCATTGAGTTCTCC  
TCTGTTCCAGGGTGGAGCGGCTTGCAGAGCTGCTATCAGCTGAAGTGCGCACTCGTGAGGGCCTCTTGAAT  
CGCGCGAAACTGGTGCTGGAACATTTTTCGCACGATCGTTGTGACTGCCACTAATCTGTGCCCTCGAGGCTC  
TCACGGAGGATGGTGTGATTATCGCCCTCACTTCGACTTGCCAATGCCCGCATTTACCGCGCTTGCAAGACG  
TGAAGGAGGAGTCGCTCCCCTTTCTACAGGAGGTATGTGACTTTCTGTAGTGCAGACATCGTTCTGCATTG  
CATTCTTAAACATGAACTCATCTGCTTGTAAAGGTAATAAGGGTACTAATGGTGGCAAGGTTACTTGCGATGACAGGGTTA  
AATGTGTGAAACGCGGTGGAGTTCGATTCACTATCGGAGGAAACCCATACTTACAATGATTTTGATCGACA  
ACGTTGGAGGTGCAGGTGATATCAGGTCTATGAGGGTTAAGGGGCAGTATGGCGGTTGGGTGAACATATTCC  
GGAACGGGGATCGATACGGACTTGCCGGACCAAGGTAGCTGGAGCATTGTCTTTTCATGATCACGACGACAG  
ACGGACGGTCCATAGTGTCCAACAGAGCGGCAAACGTGGGAGGGCTGCCAGTTCAGATAGTCCCCTgGGAC

CCATCGCGATTCTTAGTCTGTCTCGCAAGGGACCGTTTTCGATCGAACTCAACGACGCTCCTCGGACCCTGA  
TGTGCCTGCAGGAATGGCCCGTTCGTCCGCGCGAAGCTGATCGCAGCCCAGACGGTCACGAAGACCTGCTG  
CTTCGCTGCACATTCTTTTCAGTTTGG

>PpEXPA21 [none]

MGLPEVLGAPYG\*RNAHITYYGSPPNGGGTEGGACGYQNTYSLGYGFMTAALSSSLFQGGSSCGACYQIRCEP  
IRVTRTVKNWCWSYSRTITVTAINLCPFRSSGGCCNPPLQHFDLMPAFLSLARREGGVAPV\*YTKVRSEKR  
GGIRFTMGGNLWFLTILIHNVGGAGDVRSVRIKSPHSLISMYRNWGLWTVRARMGALFFMITTSHGRVL  
ITRNAVGSWRFQGTWEGNFP

>PpEXPA21

ATGGGACTGCCGGAGGTGCTCGGGGCCCCGTATGGATAGAGAGATGCTCACATAACTTACTATGGCTCTCCC  
AATGGCGGTGGAACGGAAGGAGGTGCTTGCGGGTACCAAAACACTTACTCGCTGGGGTATGGCTTCATGACA  
GCGGCGTTGAGCTCGTCTTTGTTTCAAGGTGGAAGCTCGTGCGGTGCCTGTTACCAGATCAGGTGCGAACCC  
ATTAGGGTTACACGCACCGTGAAGAACTGGTGTGGAGCTACTCTCGAACCATCACAGTCACCGCCATAAAC  
CTCTGCCCACCGCGATCCAGTGGCGGATGTTGCAATCCCCCTCTCCAACACTTCGACTTGCCAATGCCTGCC  
TTCCTGAGTCTGGCAAGGCGAGAAGGTGGCGTGCSCCCCGTTTTAGTACACCAAAGTGCAGTGCAGAAACGA  
GGTGGGATTCGGTTCACCATGGGAGGTAACCTCTGGTTCCTGACGATACTCATTACACAACGTTGGCGGCGCG  
GGTGACGTGAGATCCGTGAGGATAAAATCACCACACTCGGGGTTAATCTCCATGTATCGTAACTGGGGCTCG  
CTGTGGACGGTCCGAGCGAGGATGTCCGGAGCACTGTTTTTTCATGATCACCCTAGCCATGGTTCGCGTTCTC  
ATCACTCGGAACGCAGTGGGAAGCGGTTGGAGGTTTTGGCCAGACCTGGGAGGGAAATTTCCCT

>PpEXPA22 [none]

MTMAAFGVKQTVALLVQLAVVVHVSVVGAPPGWQDAHITYYGSPPNGGGTQGGACGYQNTVSLGYGFMTAALSS  
PLFQGGKACGACFQLQCARVQETRTVKNWCHDYSKAITVTATNLCPFGSEGTWCDPFRHFDLMPAFLSLA  
RQEGGVAPVYYRRVQCLKKGIRFTMGGNPWFLMVLVHNV?GAGDVV?VKVKCPSSGWYDMYRNWALWTVQ  
KKMVGPLSFLLTGDRRLTAYNAVGNWTFGQTWEGAQY

>PpEXPA22

ATGACGATGGCTGCATTCGGCGTTAAGCAAACCGTTGCTCTGCTGGTTCAGCTGGCGGTGGTTGTCCACTCG  
GTGGTTGGTGCACCACCTGGGTGGCAGGATGCGCACATCACTTACTACGGCTCGCCCAACGGTGGAGGGACA  
CAAGGAGGCGCTTGTGGGTATCAGAACACAGTGTCACTGGGATACGGATTCATGACTGCGGCGCTAAGCTCT  
CCTTTGTTTCAGGGTGGAAAGGCTTGCGGTGCCTGCTTCCAACCTCCAATGTGCTCGAGTTCAGGAAACCCGA  
ACTGTGAAGAATTGGTGCCATGATTACTCGAAGGCCATCACCGTCACCGCCACCAATCTGTGCCCCCAGGA  
TCTGAAGGAACATGGTGCATCCTCCTCGGCATCACTTCGACTTGCCAATGCCCGCTTTCTTGTGCTTGCA  
AGGCAAGAAGGAGGAGTTGCTCCAGTTTACTACAGGAGGGTGCAGTGTGTTGAAGAAGGGCGGAATCCGGTTT

ACCATGGGAGGCAACCCCTTGGTTTTCTGATGGTACTTGTTCACAATGTTGSCGGTGCAGGCGATGTAGTGSCC  
GTGAAAGTGAAGTGCCCCTCTTCTGGGTGGTATGACATGTACCGGAATTGGGGTGCATTGTGGACCGTGCAA  
AAGAAGATGGTGGGACCCTTATCTTTCTTACTCACCACGGGCGACGGTCGCAGATTAAGTGCCTACAATGCA  
GTGGGCAACGGTTGGACTTTTCGGCCAGACTTGGGAGGGCGCTCAATAC

>PpEXPA23 [none]

MKMDARSGMKLAVVLLVHLALCASPVFGAPPGGWINGRITYYGSPNNGGTQGGACGYQNTVSLGYGFMTAAL  
STTLFKGGAACGACYQLQCAPVSETPSGLLKRNCWQVGRSILVTATNLCPPGSSGGWCNPPQHFFDLMPMA  
FLALARREGGVVPVYRKNVNCARKGGIRFTVGGNPWFLMILIHNVGGAGDVVAVKVKCPTSGWYDMYRNWGA  
LWTVQKKMNGPLSFAITTS DGRTVTTYNVAVGNGWKFGQTWEQAQYR

>PpEXPA23

ATGAAGATGGACGCTCGATCCGGTATGAAGCTCGCGGTGGTTCTGCTCGTTCACCTGGCGCTCTGCGCGTCT  
CCTGTGTTCCGGTGCCCCGCCTGGAGGATGGATAAATGGGCGCATCACGTACTATGGTTCGCCAAATGGCGGA  
GGGACGCAGGGCGGTGCTTGCGGGTATCAGAACACTGTATCGTTGGGATATGGCTTTATGACAGCAGCACTG  
AGTACCACTCTGTTTTAAAGGTGGAGCGGCCTGTGGTGCCTGCTACCAGCTGCAGTGTGCCCCAGTCAGCGAA  
ACCCCGAGTGGGTTACTCAAGAGGAACTGGTGTGGCAGGTGGGTAGAAGCATTCTCGTCCACCGCTACCAAC  
CTCTGTCCTCCAGGCTCTTCAGGAGGATGGTGTAAACCCTCCGCAGCACCATTTTCGACTTGCCAATGCCTGCC  
TTCTTGGCCCTCGCTAGGCGTGAAGGGGGTGTGTTCCAGTCTACTACCGGAAGGTGAATTGTGCGAGGAAG  
GGTGAATTTCGATTCACTGTGGGAGGCAATCCTTGGTTCTTGATGATCCTTATTCACAACGTTGGCGGGGCA  
GGTGTGTGGTAGCTGTCAAGGTTAAGTGCCCCACCTCCGGATGGTATGACATGTACCGGAACTGGGGTGCA  
TTATGGACTGTGCAGAAGAAGATGAATGGGCCACTTTCTTCGCGATCACAACGAGCGACGGGCGCACGGTG  
ACCACCTACAATGCGGTGGGCAACGGTTGGAAGTTCGGGCAGACCTGGGAGGGCGCCCAATACAGG

>PpEXPA24 [none]

MFNCSSSNRKMSAASCMKLAVFLLVQLVLFAPAVLGAPPRGWSSGRITYYGSPNNGGTQGGACGYQNTVSLG  
YGFMTAALSTPLFNGGAACGACYQLQCAPVHETPKNLLQRNWCWKVGRRITITATNLCPPGSEGGWCDPPQH  
HFDLPMPAFTALAKREGGVVPIYYRRVRCAKQGGIRFTMGGNPWFLMILIHNVAGAGDVVAVKIKCPTSDWC  
DMYRNWGAFWTVQKKMEGPLSFQITTT?DRRKVTTTHNAVGHGWQFGQTWEQAQYR

>PpEXPA24

ATGTTCAATTGCAGTTCGAGCAACAGGAAGATGAGTGTGCATCCTGTATGAAGCTCGCGGTGTTCTGCTC  
GTTTCAAGTTGGTTCTGTTTGCCTGCTGTGCTTGGTGCGCCACCGAGAGGGTGGTTCGAGTGGCCGAATCACC  
TACTACGGCTCGCCTAACGGTGGAGGAACCCAGGGAGGCGCTTGCAGTACCAGAACACAGTGTCACTGGGG  
TACGGGTTTCACTGACTGCGGCTCTGAGCACTCCTTTGTTTAAACGGCGGAGCAGCATGTGGGGCGTGTATCAG  
CTCCAATGCCTCCAGTGCACGAACTCCAAAGAATTTACTCCAGAGAAATTTGGTGTGGAAGGTGGGTGCA

AGGATCACCATCACCGCTACTAACTTGTGCCCTCCAGGCTCTGAGGGAGGATGGTGCATCCTCCTCAGCAT  
CACTTTGACTTGCCAATGCCCCTTTACGGCCCTTGCAAAACGCGAGGGAGGTGTTGTTCCAATCTACTAC  
AGGAGGGTCAGGTGTGCGAAGCAAGGTGGAATTCGATTACGATGGGAGGGAACCCTTGTTTTCTGATGATC  
CTCATCCACAACGTAGCTGGCGCAGGTGATGTGGTAGCTGTGAAGATCAAGTGCCCTACTTCTGATTGGTGT  
GACATGTACCGAACTGGGGTGCATTTTGGACTGTGCAAAAAAAGATGGAGGGGCCGCTTTCCTTCCAGATC  
ACGACGRGTGATCGGCGCAAGGTGACTACCCACAATGCAGTTGGTACGGTTGGCAATTCGGGCAGACCTGG  
GAGGGCGCCCAATATAGG

>PpEXPA25 [B]

MLHFYDGRCTPKMSGLTRVEVTFVMFVATLVI PSVLGMPVGVWRDAHITYYGSPNGGGTQGGACAYQNTFSLG  
YGAMTAALSSPLFEGGAACGACYQLQCKRVQETRIVKNCWSYSRTITITATNLCPPGSAGAWCDPPRHFD  
LTMPAFLTLARREGGVAPVLYRRVKCVKRGIRFTIGGNPWFLMILIHNVAGADVRAVRIKTPSTDWIPMY  
RNW GALWTVQRKLSGPLSFQITAGDRRQITINSAVGNAWKFGQTWEGHNFR

>PpEXPA25

ATGTTACATTTTTACGATGGCAGGTGCACCCCAAAGATGAGCGGCCTAACTCGTGTGGAGGTCACTTTTGTG  
ATGTTTGTGCTACGCTGGTTATAACCGTCGGTGTGGAATGCCGGTTGGATGGCGCGATGCGCACATCACC  
TATTACGGGTACCTAACGGTGGAGGAACACAGGGTGGCGCTTGC CGGTATCAGAACACATTCTCGCTGGGC  
TACGGTGCCATGACTGCGGCGTTGAGCTCGCCTTTGTTTGGAGGTGGAGCGGCTTGTGGGGCTTGCTACCAG  
CTTCAGTGCAAACGAGTGCAAGAAACCCGTA CTGTGAAGAACTGGTGTGAGTTATTCTCGAACCATCACC  
ATCACTGCCACTAACCTCTGTCCACCAGGCTCTGCCGGGGCGTGGTGC GACCCTCCAAGGCACCATTTTCGAC  
TTGACAATGCCTGCCTTCCTAACCTGGCGAGACGTGAAGGTGGTGTGGCTCCAGTGCTATACAGAAGGACA  
TACCGCgCTTYTGCCAATCTATGGTGTGGTCTGGTGCAGAATCTTAGAATTTTGTGCACATACGCATTTGG  
TACAATATTTGAACTTGAATCAACCTTACTTCCAAGAAATAGCTAAATACAGTCTGTGGGTGCAGGGTTAA  
ATGTGTCAAACGCGGTGGAATTCGGTTCACCATAGGAGGCAATCCTTGGTTTCTGATGATCCTCATCCACAA  
CGTCGCTGGCGCAGGCGATGTAAGGGCCGTTAGAATCAAGACCCCGTCCACTGACTGGATTCCCATGTACCG  
CAACTGGGGTGC GTTGTGGACAGTACAAAGGAACTCAGCGGGCCCTCTCATTTCAGATCACTGCCGGCGA  
CCGCCGTCAAATCACCATCAACAGTGCAGTAGGCAATGCATGGAAGTTTGGACAAACCTGGGAGGGCCACAA  
CTTCCGC

>PpEXPA26 [B]

MKMSATSGVQLAVLLLALSVSSVLGGPFGWNFRITYYGSPNGGGTQGGACGYQNTFALGYGTNTAALSSRL  
FQGAACGACYQLRCIAPKWGKNWCWNYARSIVVTATNLCPSGSNGGWCPQAHFD?PMPAFTSLARKEGGV  
TPIMYRRVRCARRGGIRFTIGGNPFLLMVLIHNVGGAGDVRAVSIKQYTGWVGMYRNWGLWTCTTKIDGA  
LTFRITTDGKTLILYNAVRKGRFRFGQTWEGSQFR

>PpEXPA26

ATGAAGATGAGCGCTACATCCGGTGTACAGCTCGCTGTCCTCCTTCTTGCCTGAGTGTATCTTCTGTGCTT  
GGAGGGCCATTTGGTTGGAACCTTTGGACGCATCACCTACTACGGTTCTCCGAATGGAGGTGGAACGCAGGGA  
GGCGCTTGCGGGTATCAAAACACTTTTCGCACTAGGATACGGAATAATACTGCTGCGTTGAGTTCACGTTTG  
TTCCAAGGCGGGGCTGCCTGCGGAGCTTGCTACCAGCTCAGATGCATTGCGCCGAAATGGGGTAAGAACTGG  
TGCTGGAACACGCAAGGTCCATCGTGGTTACTGCCACAAATCTTTGCCCATCAGGTTCAAACGGAGGCTGG  
TGCAACCCTCCCAAGCCCACTTCGATTGCGCGATGCCTGCCTTCACTAGTCTAGCAAGGAAGGAAGGAGGTG  
TTACCCCTATCATGTACAGGAGGTGAGATTTGGTTGCACTTCTGTAATGTTTAGGCCGGTGAATTGATGCGA  
CTTTTGAACATTGACGTCGTTTTTGAAGTGAAGGAGGTGTTTCAAGATTCGTGCGTTGTG  
TGTCTATGACAGAGTGAGGTGTGCCAGGCGGGCGGTATTTCGCTTACCATAGGAGGCAACCCTTTCTTCTT  
GATGGTTCTCATTACAACGTTGGAGGTGCTGGTGTGTTAGGGCTGTGTCCATCAAGGGACAGTACACTGG  
GTGGGTGGGCATGTACCATAATTGGGGTTCCTTTGGACATGCACAACGAAGATTGATGGTGCCTGACTTT  
CAGGATTACAACCGGTGATGGAAAACACTAATtCtTTAcAATGCTGTGCGCAAAGGTTGGAGGTTTGGCCA  
AACCTGGGAGGGTCCCAGTTTAGG

>PpEXPA27 [AB]

MTIEQRTMVQAHVTFKLLLVLGCVLQVQAAYGPSGWATATATFYGGADAGGGACGYGNLYSTGYGASTTAL  
SAPL?NGGSACGACYQLQCARSNH CYAGRSITVTATNFCPTGSEGGWCNPPRKHF DL SMPMFTTLARQVAGV  
VPVDYRRVACNKKGGQRFLMTGNPYFIMVLVYNVAGAGDVQRFFVKGSMTGWYELRRNWQIWTCTADSRLK  
GQALSFRQTSDGRQVVSIDAAPANWNFGQTFSSGVN

>PpEXPA27

ATGACAATCGAGCAGCGGACGATGGTGCAAGCACACGTAACCTTTTAAGCTTCTCCTTGGTGTCTAGCTGGGTGC  
GTTTTGCAAGTGCAAGCTGCTTACGGTCCCAGTGGCTGGGCTACAGCGACGGCGACGTTCTACGGGGGTGCG  
GATGCGGGAGGAACTATGGGTACGTTCTAGTGGATTTGTTTCACTACTGtCCTKTTGGTYTWTRCGCACAMAT  
TCGGTCCGGTaAAATCAGGGcCAGCTCCTGATAGTtCACTTCTGTTTCACTGTGGGCATCTKCCGTCTGCGA  
AMACATGGTGTGAGTTGTTTGGCACGCGTTAAAGACCATTGTGGTGTAGAATGTGGGTGGTAATGAAAATG  
AGTACCCCAACCTTGATATGATATCATAWCCTTTCAASGATTCTGACTGGCAAATGTCTCTCACATASAGTG  
GAGAGTTAGATRATATcTGGATGTGAATTCGCTCTGATTATYTTGCCTTCTTACTCCCAACACACGGTCTGT  
AACATTCTWGTATAGCGCGAGGATTATCAGTGAGtTTTACACTTTGGTCGCAATTTTCAGGAGGTGCATGCG  
GGTATGGTAATTTGTACAGCACTGGTTACGGAGCTTCTACAACCGCCCTGAGTGCGCCACTTKTCAACGGTG  
GTTCTGCTTGTGGAGCGTGTACCAACTCCAATGCGCTAGAAGCAACCATTGTTACGCAGGGAGATCGATTA  
CAGTCACGGCAACTAACTTTTTGTCTACCAGGTCGGAAGGAGGGTGGTGCAATCCTCCCAGGAAGCATTTCG  
ACCTGTCCATGCCGATGTTCACTACTCTTGCAGGCAGGTTGCAGGAGTCGTTCCCGTAGACTACAGAAGGT

ATGTATAATCCATCGTCAACTCTCATTTCGAGTTCAGAGCTTTACTTGTTTTACATGCGAAAAATGCACGT  
TAGTAAACTCTTCGTCGTTGTGGAATGGATTTTGTATCACATGAAATTCTCTTCAGCAATATAGTGCGATG  
GTTGTCTCTCGCAGGGTAGCCTGCAACAAGAAGGGAGGTGAGAGGTTCCCTTATGACCGGAAACCCCTACTTC  
ATAATGGTTCTAGTCTACAACGTCGCTGGCGCTGGTGATGTCCAAAGGTTTTTCGTCAGGGCTCCATGACG  
GGGTGGTACGAGTTGAGAAGAACTGGGGACAGATCTGGACGTGCACTGCGGACAGCAGACTGAAAGGACAA  
GCCCTCTCTTTCCGCACACAAACCAGCGATGGTCGGCAAGTGGTTTTCTATCGACGCAGCTCCTGCAAAGTGG  
AACTTCGGTCAGACTTTTCAGCAGTGGTGTTAAT

>PpEXPB1 [A]

MGGFQLGLLLLCCVVGVSQAWDLPGGVKLSAEGYNENWLGGHATWYGDYPYEGSSGGACGYTQLTGTPIGSK  
IAAGNAPIFQEGKCGQCYEKCNYPSCSPQGTRIVITDLCPPGGQYCSTDQPAFDGSGAAITAMALPGRDGE  
LRNIGLYDIQYKRVPC EYPNQNI AFKVDAGSSKYWFSFTVKYLGGPGDINTVEVKCGKNGYFQYAQHSWGAN  
WMLINYSVGFQFPLTIKITTKLNDHTVVAEDVIPDWFPGVQYESNVQIRY

>PpEXPB1

ATGGGGCGGTATGTTCTGCTCAAGAGCTTTCCGGTTCAGATTTAGTTCCTTCGAAGGTCGTTGACATCCTC  
TTGGAGTAGCAGCTCAGTTCTGCCTTGAGTTGCCGCAATGGGGGGCTTTTCAGTTGGGGTTGCTGCTTCTGTG  
CTGTGTCGTGGGAGTGTCTCAAGCATGGGATCTGCCCGGGGGTGTCAAACCTTAGTGCCGAGGGCTACAATGA  
GAACTGGTTGGGTGGACATGCGACCTGGTACGGTGACCCCTACGGCGAGGGCTCGAGTGGTAGGTTCTTCTC  
TTGGTCCATGCCTATTCTTCACGCTTTGACGTTAGGTATTTTGAACCTCTTCAATGTGTAGCCAGACTCACGC  
CACGGTTGCTTGAGAACTGTCGCCAATTGTGGTTCGGATTGCAGTCACTGACATCCTGCCTGATTCTTCTTTC  
GTGTAGGAGGAGCATGCGGCTACACCCAACTCACGGGCACACCGATTGGATCCAAAATCGCCGCTGGCAATG  
CACCCATTTTCCAAGAAGGTAAGGGATGCGGTGAGTGTACGAAGTGAAGTGAACCTACCCGAGCTGCAGCC  
CTCAGGGAACCAGGATTGTCATTACTGACTTGTGTCCCGGAGGCCAGTATTGCAGTACTGACCAGCCCGCCT  
TCGACTTCAGCGGCGCAGCCATTACTGCCATGGCGCTACCGGGTCGCGACGGGGAGCTGCGCAACATTGGAT  
TGTACGACATCCAGTACAAGCGCGTGCCATGCGAGTATCCCAACCAGAACATTGCCTTCAAAGTGGACGCAG  
GATCCAGCAAGTACTGGTTTTCTTCCACCGTGAAGTACTTGGGTGGGCCAGGCGACATTAACACCGTGGAAAG  
TAAAATGTGGTAAGAACGGGTACTTCCAGTATGCTCAGCACAGCTGGGGAGCGAATTGGATGCTCATAAATT  
ACTCAGGAGTACCGTTTTAGTTCCCTCTCACTATCAAGATCACGACGAAGCTGAACGACCACACTGTCGTCG  
CTGAGGATGTGATCCCAGATTGGTTTTGGCCCAGGAGTTCAGTATGAGAGCAATGTACAGATTAGGTACTAG

>PpEXPB2 [A]

MSTAFQAVWLVCVGLLSLQAAEAGYLAQNGYHERWVRARGT WYGDYPYEGSSGGNCGYTKLWGTPIGPKIVA  
GSRSIYANGQCGQCQYQIRCVDPNGGPRLCNPQGTNVVVTFDPCGGTYCSTGENAFDMSGAAINAMALRGRE



GQLRNRGLYNLLYKRVPCRYRGTNIEFRVDNGSSPFWLSILIKYVGGPGDIGQVYIRMANWYKFQPMRHAWG  
ANWMIPNYDGKPFRRGPMDIRIVSRLNRHTVLRGVIPAYFRPGTSYRSRVQMAF

>PpEXPB2

ATGTCGACGGCTTTCCAAGCGGTGTGGCTGGTGTGTGTGGGCCTTTTGAGCCTGCAAGCAGCCGAAGCGGGC  
TATTTGGCCCAGAATGGATAACCACGAGCGATGGGTCCGCGCTCGCGGCACCTGGTACGGGGATCCTTATGGC  
GAAGGCTCTAGCGGTACGTTTCCAGCTAAGAATATGTTTCAGCAATTCCTTGTCCAAACTAATTAATCTGAAA  
GAATTATATGTATCGTTGTCATTTTCTGACGGTTGCTCTTGCGTTTTCAAGGAGAACTGCGGATACACTA  
AGCTTTGGGGCACACCCATCGGGCCTAAAATTGTTGCCGGAAGCAGGTCAATCTATGCTAATGGGCAGGGTT  
GCGGCCAATGCTATCAAATCAGGTGTGTTGATCCAAACGGAGGACCCAGGCTCTGCAATCCTCAAGGCACGA  
ACGTCGTCGTGACTGATTTCTGTCCCGGTGGAACCTTACTGCAGCACCGGGGAAAATGCCTTCGACATGAGCG  
GGGCCGCGATAAATGCAATGGCGTTGCGTGGGAGAGAAGGCCAGCTCCGCAACCGTGGTTTTGTACAACCTGC  
TCTACAAGAGAGTCCCTTGTTCGATACAGGGGTACCAATATAGAATTCCGTGTTGATAACGGCTCCAGTCCCT  
TCTGGCTCAGTATTTTGTATAAAGTACGTGGGAGGGCCTGGTGACATTGGTCAGGTGTACATTAGGATGGCGA  
ACTGGTATAAGTTCCAGCCGATGAGGCATGCGTGGGGCGCTAACTGGATGATTCCCAACTACGACGGGAAGC  
CGTTCAGGGGCCCATGGATATTAGAATTGTATCGAGATTGAACCGTCACACAGTGCTTGCTAGAGGAGTCA  
TTCCCGCCTACTTCAGACCTGGAACGTCTTACAGGTCTAGAGTGCAAATGGCTTTTTTAG

>PpEXPB3 [AcnFn]

MGSSVVLRRQPTVLLWIALASVLPVAHCSGSLEASGYTASWLPGHATWYGDYPYEGESSGGACGYTELAGTPYG  
LSVGAGSAVIYQNGQCGECYEVKCTYPSCKPTPSRIVITDFCPGGTFCSTGEPAFDLSGMAMTNMALPGRD  
QELRNLGLYEIQYRRVPCYYPNQNVAFKVDPGSTPFWLSFTIEYQGGPGDIESVAIRQAGSSEFQMQHNWG  
ANYMLICYSGKPFKPYDVMITAKLNHVLIAQDAIPEYFQPGGIYESNVQLGY

>PpEXPB3

ATGGGAGTTGTACAAAAGCAGTTATTGCGGTTAGTAGGAGACTGGTCCTGCATTGCATGGGGATGCTTGGAC  
TGGTGAATAGACGTTGCGGTCTGTGTGGAGCTACCCACATTTTCTGCAGCACTTGTGACCAAGGATGGGAT  
CCTCAGTGGTTCTTCGCCAACCCACTGTGCTGCTGTGGATAGCCCTTGCGAGTGTGCTTCCAGTTGCTCACT  
GCAGCGGCTCCCTGGAGGCCAGCGGGTACACCGCTTCCCTGGCTCCCTGGACATGCAACTTGGTATGGGGATC  
CATATGGAGAGGGCTCAAGCGGTACCACACTCGATAATCACTCATTCTTGCAATTGAAATTGCCTGTAACCTCT  
AAATTGTCTGTATTATCTAAATTGCATAAATATAGATATATATGTATATATATATATATATATATCATCTGCTAGACA  
ATTCTGATAGTACATATCGTGCTTCCGCATATCAGTTGATAGGGATAAGTGAAACCAAGAGTAGTAACCACT  
AGCTTTCAACAATGTCTATTGGTGTGGTTACCGTAGAGAATCTTCTTTCTTTGGACTTATTCACCTTGATGAC  
TGTTGACATTGTTTCAGGAGGAGCTTGTGGCTACACAGAGCTCGCAGGTACTCCGTATGGTTTTGAGTGTGGGT  
GCGGGAAGTGTGTCATCTACCAGAATGGCCAAGGGTGCGGCGAATGCTACGAAGTAAGTGGTCTGTGTAGA

ACGCCATACCTTGCAAAATAGAAAACACACACAGATCCTCAAGACATTAATCTCCATAGAGATATTCAAGCA  
CATAATTCATATTCTTTTGGCTTTTTCTCCGGTGTATGATTCACAATGCAGGCCAACTTTTACGAAGAGGAGA  
ATTTAAATACTTGTCAAAACTGTTGCCACAGGTTAAGTGCACGTACCCATCTTGCAAGCCGACGCCAGTAG  
AATTGTTATTACTGATTTTTGTCAGGTTTGTGCACTTGGCTCATTTCGTTCAATTTTTCTAACACATTATCAC  
AGTCACGATGTCAGTTTATAACGATAATGTCTTTTGTACTCAAATACGCATTACTTGACAGATTAGTCCGTG  
TTTTTCAAGGAGGAACGTTTTGCAGCACAGGCCGAACCAGCATTGATCTCAGTGGCATGGCCATGACAAAACA  
TGGCTCTTCCTGGCAGGGACCAGGAGTTACGTAACCTTGGGCTTGTACGAGATTCAATACAGAAGAGTGCCCT  
GTTATTATCCAAACCAGAACGTCGCTTTTAAAGTAGACCCCGGGTCCACCCCGTTTTGGCTTTCGTTACCA  
TTGAATACCAAGGAGGACCAGGAGACATTGAAAGCGTCGCTATAAGACAGGTAATGAATTTGGCCTTCTCGT  
TCACGGTCTCCAGGCTTAACTTGGAGTATTGCATGAAGTTTCTGTCATAGAGTTGCATGTATCTCCAAAA  
TCAGATCAAGAACTTTGCTTTAAGGGATGCTCTACTTTTAAACAAGCACACAGATCATTCTATGTCCTCAAC  
TCTCTTTTAACTTTTTGGATGTTTGTCTCCAGGCTGGTAGCTCTGAGTTCCAGCAGATGCAACACAAGTGG  
TAATGCCACTCAGAATCACGCACTAGTACTACATCTGCTTCACTTGGAGTGAAGAATATTCAGTCGCATGCT  
GTTAGACTAAATGGTCATGTGTTGATGTTTTTTCTGCAAGGGGTGCTAATTACATGTTAATCTGCTACTCCGG  
AAAGCCATTCAAGGGACCCTACGACGTGATGATCACTGCCAAATTGAACGGCCATGTCCTTATTGCCAGGA  
TGCCATTCCGGAATACTTCCAACCAGGAGGTATCTACGAGTCCAATGTGCAGCTAGGGTAC

>PpEXPB4 [A]

MAAIQVLLLVGLVGLPAAMGLASSMAANGYNENWVPGHATWYGDYPYEGESSGG?CGYLQLTGTPIGNKIA  
AGNEAIFQKKG??QCYEVKCNYPVCRPEGTRIVITDLCPG?QFCSSGNPAFDLSGAAISAMAKDGQDGLR  
NIGLYDIQYKRVPCYEPGQNIQVFKVDAGSSPFWLSFTVKYMGPGDIESVSIQRDGSFI PAQHSWGANWML  
INYSGAPFQGPYSVKINCLNGHTVVAKDVI PAGFAPGQYEYESNVQIGF

>PpEXPB4

ATGGCAGCTATCCAAGTTGTGTTGCTACTGGTGGGTCTGGTGGGATTGCCGGCAGCCATGGGATTGGCAAGC  
TCCAGCATGGCTGCAAATGGATAACAACGAGAACTGGGTCCCTGGACACGCTACATGGTACGGCGATCCCTAT  
GGCGAAGGATCCAGCGGTAAGTGCATCTAGTTTATTCTCAACTCTTCCACAAAAGTGGATTAAACCAAGC  
CACGTTGCTAAGATTACCATGTTGCTGACAATGTGAGATTATCATGGCCAGTCTAGACTCATGTGGGTGTT  
GTAACCCTTTGTGAGGAgGASMATGTGGCTACCTCCAGCTCACTGGAACGCCATTGGCAACAAGATTGCT  
GCCGGAAACGAAGCCATCTtCCAAAAAGGCAAGGGTKGCGSCCAATGCTACGAGGTGAAGTGAATTATCCA  
GTGTGCAGACCTGAGGGGACGAGGATTGTCATCACAGACTTGTGCCAGGAGSCCAGTTCTGCAgTGGTGGC  
AACCCCGCTTTGACCTGAGCGGCGCAGCCATCAGCGCCATGGCGAAGGATGGTCAAGACGGAGCCTTACGG  
AACATTGGCTTATACGACATTCAGTACAAGAGGGTGCCGTGCGAGTACCCGGGCCAGAACATTGTCTTCAA  
GTAGACGCTGGCTCTAGCCCTTTCTGGCTCTCATTACCGTGAAGTACATGGGAGGCCAGGTGACATTGAA

AGCGTTTTCAATCAGTCAGCGTGATGGCTCTTTTCATCCCGGCTCAACACAGCTGGGGAGCCAATTGGATGCTC  
ATCAACTACTCCGGAGCACCATTCCAGGGTCCCTACTCCGTGAAAATCAACTGCATGCTGAACGGCCACACC  
GTTGTTGCCAAGGACGTTATTCCAGCTGGTTTTGCACCCGGTCAGGAATACGAGAGCAATGTGCAGATTGGG  
TTC

>PpEXPB5 [none]

MKMSTLAFCAVLLLLFLELLGLPVAFCGTLALSGYNEQWMAGHATWYGEPLGEGSSGGACGYTKLADTPYGP  
IAAGNDPIFQGGSGCAGCFEVKCNYPSCKSEPTRIIITDQCPGGTYCSTSQPAFDLSGAAISDMAVSGKDGE  
LRNIGLYDILYKRVPC EYPNQNI AFQVDAGSSAFWLSLLVKYMGPGDIESVEIRTTGSSSFQPAKHNGAS  
WMLINTSGQPFKGPYDVKIVSKLNGHTVIAEKAIPEFFEPGKLYESNVQ MAY

>PpEXPB5

ATGAAAATGTCGACACTGGCGTTCTGTGCGGTACTGCTGTTGTTCTTAGAGCTACTGGGTCTCCAGTTGCT  
TTCTGCGGCACCTTGGCTCTAAGCGGTACAATGAACAGTGGATGGCCGGACATGCCACATGGTACGGGGAA  
CCTCTTGGTGAAGGATCCAGTGGTGGCGCTTGTGGCTACACAAAGCTTGC GGATAACCATATGGACCCAAA  
ATTGCAGCGGGAAACGATCCAATTTTCCAAGGAGGTAGCGGATGCGGCGCATGCTTCGAGGTGAAGTGCAAC  
TATCCATCTTGCAAGTCCGAGCCAACCCGGATTATCATCACAGACCAATGTCCTGGAGGAACTTACTGCAGC  
ACATCTCAGCCTGCATTCGACCTGAGTGGCGCTGCTATCAGCGACATGGCTGTTTTCGGGTAAGGACGGAGAA  
CTGCGCAACATTGGGTTATACGACATCCTGTACAAGAGAGTGCCATGCGAGTACCCGAATCAGAATATTGCC  
TTCCAGGTGCGACGAGGCTCATCTGCTTTTCTGGTTGTGCTCCTGGTGAAGTATATGGGAGGGCCTGGCGAT  
ATTGAAAGTGTGCAAATTCGTACAACGGGGAGCTCATCTTTCCAACCAGCAAAGCACA ACTGGGGTGCCAGC  
TGGATGCTCATCAACACGTCCGGCCAGCCATTCAAAGGCCCTTACGACGTCAAGATTGTGTCCAAGTTAAAC  
GGTCATACTGTGCATCGCCGAGAAAGCGATTCTGAGTTTTTTGAACCAGGGAAGCTTTACGAGAGCAACGTG  
CAGATGGCGTAC

>PpEXPB6 [A]

MATMAQVVVLVVLGLMSLLLCAEAGWLGNYHEQWVRARGTWYGDYEGSSGGNCGYTRL\*GTPIGPKIV  
AGRSIY?NGLGCGQCYQNQCVDP??G?KL?NSF?TQ??TDFCPGG?YCSTGENAFDMSGAAINAMALPSR  
EGQLRNRGLYNLLYKRVPCRYRGT?I??RVD??SSAYWLSILIKYVGGPGDIGQVYIKMANWFAFQPMKHAW  
GANWMMPSYDGKPFKGPMDIKIVSKLNRHSVVARGVIPGYFRPGTTYNRSRVQMAF

>PpEXPB6

ATGGCGTCACAGGCGCGGTTCCCAAAGCTTTACCTCCCAAATTCGATATAACCGACGCCGGGTCTATTTTCG  
GACCCAGTTACTTGTCTCTGAGGTGAGCGCTAAGAACTAGCGTTGAATTACGCATCGGATCCCTCCGA  
AACAACTCTCGGCTGTTAGCTATAATCGAACTATTGCTAATTGAATACACAGAAAGAAGTCGGTTATTTCGT  
CACCTGTCAATCTCGTCGCGACACGAACTCCGATTCCCCTCCTCCCCACCCACTCCCCGGCCCCACCAGCAT

CATCGTCGATTAAGTGCTGCCGGTGGGACGGTCTACTTCCGTGCAACTTGTTGAATTCGGTGCAAGTGTGGT  
AGCAGCAGTGGTGCAGCTGAGGAAGAGCAGTGTTTCGTGATTGAGAGAGTTAGCTGGGACTGCACCATGGCGA  
CGATGGCTCAGGTGGTGTGGCTGGTTGTGTTGGGCCTCATGAGCCTGCTGCTTTGTGCCGAAGCGGGTTGGT  
TGGGTAACCAGGGGTATCATGAGCAGTGGGTCCGCGCTCGCGGCACGTGGTACGGAGATCCTTACGGCGAAG  
GGTCAAGCGGTGAGTTGATGCTACTCACGCTCCTGCAGCAATACTGTGTTGATCTGCACTGTGTGATGAGT  
AAATGGCAGCACTAGTCTTCTGACTTTCTTACTGATTTCTTTGTCCAAGTGGAAGTGCAGTTACACGAGGC  
TCTAGGGCACTCCCATCGGTCCCAAGATTGTTGCCGGCAGTCGCTCGATCTACGCMAACGGGCTTGGTTGTG  
GCCAATGCTACCAGAAaTCAGTGCGTTGATCCAGSCAMGGAMCCAAGCTCKGCAATtCCTTCRGSACaCAAK  
TTGYCKTgaCCGATTTCTGCCCCGGTGGAAaCWTACTGTAGCACTGGGGAGAATGCATTTGACATGAGCGGAG  
CTGCCATCAATGCCATGGCGCTTCCGAGCAGAGAGGGCCAACTTCGCAACCGGGGCTTGTACAACCTCCTCT  
ACAAGAGAGTGCCGTGCCGGTACAGAGGCACCARCATCCWATTSCGCGTCGACARMGGMTCCagcgCCTATT  
GGCTGAGCaTTTTGATCAAGTACGTCCGGGGACCAGGCGACATTGGTCAGGTTTATATTAAGATGGCCAACT  
GGTTTGCGTTTCAGCCAATGAAACATGCTTGGGGAGCCAACCTGGATGATGCCTAGCTACGACGGGAAGCCGT  
TCAAGGGCCCCATGGACATCAAGATTGTGTGAAGCTGAACAGGCACTCCGTTGTTGCTAGAGGAGTCATTC  
CCGGTTACTTCCGGCCCCGAACGACCTACAATTCTAGGGTGCAGATGGCTTTC

=====

SUPPLEMENTAL FIG. 6. *Physcomitrella* expansins isolated by degenerate PCR/TAIL-PCR. Nucleotide and amino acid sequence are given. Introns are marked in blue with their phase noted in red.

*Physcomitrella patens* expansin PpEXP5

```

+1 M A I P W S S V V L V T L V S L M A C A E A K G S S F M G S D W G
1 ATGGCCATTC CGTGGAGTAG CGTGGTGTG GTGACTCTTG TTTCAATGAT GGCCTGCGCT GAGGCCAAGG GGAGCAGCTT CATGGGCAGC GACTGGGGGA
TACCGGTAAG GCACCTCATC GCACCACAAC CACTGAGAAC AAAGTAACTA CCGGACGCGA CTCGGTTC CCTCGTCGAA GTACCCGTCG CTGACCCCTC

+1 R A H A T F Y G G A D A S G T Q      INTRON #1 = 381 bp Phase = 1
101 GAGCCCATGC CACTTCTAT GGTGGAGCTG ACGCTTCTGG TACTCAAGT GGGTGCCAAG GCCGGTACT TCGATCTTG TGGCCACTGA CTTGAATGAG
CTCGGGTACG GTGAAAGATA CCACCTCGAC TCGAAGACC ATGAGTTCCA CCCACGGTTC CGGCCAATGA AGCTAGAAAC ACCGGTGACT GAACTTACTC

201 CGTGGTTGGC TCCAGTACG GTGAAAGCGT TCGCGAGGTG TCCCGTGTG GACTGTAGTT AACAGGAACG TATGTCATAA ATGTCGTGTA CCCTCATTGT
GCACCAACCG AGGTCGATC CACTTTCGCA AGCGCTCCAC AGGCCAACA CTGACATCAA TTGTCCTGC ATACAGTATT TACAGACAAT GGGAGTAACA

301 TCGTGGTGTG TCCGTGCTA GCAAAGAATT CTTCTACTCT CCTGTAACG CGTTTAGAAG CTCTGGCGCA GTTCTCGTTT TCAAGATTAG GTCTCTGTA
ACGCACCAAC AGGCACCGAT CGTTTCTTAA GAAGATGAGA GGACATTGCG GCAAATCTTC GAGACCGCGT CAAGAGCAAA AGTTCTAATC CAGGAGACAT

401 ATGCGAGTGT GACAGTACGA GTTTCTGGT TAATATCGCT GATTTCTCT TTTGTAGACA CGTACGTGCC CAACCTACT CATGAGAGTG GTCGATTCTT
TACGCTCACA CTGTCATGCT CAAAAGACCA ATTATAGCGA CTAAAAGGAG AAACATCTGT GCATGCACGG GTTGGGATGA GTACTCTCAC CAGCTAAAGA

+1 G G A C G Y G N L Y S T G Y G T N T A A L S S S
501 GAGGTTGTGC ATTGTTAATG CTTCTGTAGG TGGAGCTTGT GGATACGGAA ATCTCTACAG CACTGGCTAC GGAACAACA CAGCCGCACT GAGTTCTTCG
CTCCAACAG TAACAATTAC GAAGACATCC ACCTCGAACA CCTATGCCTT TAGAGATGTC GTGACCGATG CTTGTTTGT GTGCGCGTGA CTCAGAAGC

+1 L F N S G L S C G A C Y E L T C D P S G S Q Y C L P G G S A I I T
601 TTGTTCAACT CCGCCCTCAG CTGCGGAGCC TGTACGAGC TCACGTGCGA TCCATCCGGT TCTCAGTACT GCCTCCAGG TGGTTCGCT ATCATCACTG
AACAAAGTGA GCGCGGAGTC GACGCTCGG ACAATGCTCG AGTGCACGCT AGGTAGGCCA AGAGTCATGA CGGAGGGTCC ACCAAGGCGA TAGTAGTGAC

```

+1 A T N F C P T G S N G G W C N P P K Q H F D L A Q P V F S K I A R T

701 CAACAACTT CTGTCCTACC GGTTCCTAACG GAGGCTGGT CAATCCACCC AAGCAGCACT TTGATTTGGC ACAACCTGTC TTTAGCAAGA TAGCTCGCAC  
 GTTGTGGAA GACAGGATGG CCAAGATTGC CTCCGACCAC GTTAGGTGGG TTCGTCGTGA AACTAAACCG TGTGGACAG AAATCGTTCT ATCGAGCGTG

+1 V G G V I P I N Y R R INTRON #2 = 150 bp Phase = 2

801 AGTGGGCGGC GTAATCCCTA TCAATTACAG AAGGTAGACC TTGACAATCC AGCCCTTCGT TCAAACGTAC GCGTTCGC TCCACATTCA TGTTAATGAT  
 TCACCCGCGC CATTAGGGAT AGTTAATGTC TTCCATCTGG AACTGTAGG TCGGGAAGCA AGTTTGCATG CCGCAAAGCG AGGTGTAAGT ACAATTACTG

+1 V P C S K

901 TCTCTTTGAG ATGCTTTGGG TTTCTGGTTA GCTTCAATTI TGACACGTTT CTGAATCTGA TTTTCTGCTC TGTGGCTGC CAGAGTGCCC TGCTCCAAGT  
 AGAGAACTC TACGAAACCC AAAGACCAAT CGAAGTTAAA ACTGTGCAA GACTTAGACT AAAAGACGAG ACAACCGACG GTCTCACGGG ACGAGGTCA

+1 S G G M R F T V N G N P Y F L L V L V T N V G G A G D V Q Q L Y I K

1001 CTGGAGGCAT GAGGTCACC GTGAATGGAA ACCCCTACTT TCTGCTGGTG CTCGTCACAA ACGTCGGAGG GGCTGGTGAT GTCCAGCAAT TGACATCAA  
 GACCTCCGTA CTCCAAGTGG CACTTACCTT TGGGGATGAA AGACGACCAC GAGCAGTGT TGCAGCCTCC CCGACCACTA CAGGTCGTTA ACATGTAGTT

+1 G A S T G W L P L K R N W G Q M W Q F T G N S G M H G Q A I S F K

1101 GGTGCCAGC ACTGGCTGCC TACCCTTGAA GCGCAACTGG GGCAGATGT GGCAGTTTAC CGGCAACAGT GGCATGCATG GCCAAGCCAT CTCCTTCAAG  
 CCCACGGTCG TGACCGACCG ATGGGAACCT CGCGTTGACC CCCGTCTACA CCGTCAAATG GCCGTTGTCA CCGTACGTAC CGGTCGGTA GAGGAAGTTC

+1 A V T S D G A E A I S P N V A P A N W G F G Q T F E G S N F

1201 GCTGTCACCA GCGATGGCGC TGAGGCCATA TCCCCAATG TAGCTCCAGC CAACTGGGGC TTCGGACAGA CTTTCGAGGG CTCCAACTTT  
 CGACAGTGGT CGCTACCGCG ACTCCGGTAT AGGGGTTTAC ATCGAGGTCG GTTGACCCCG AAGCCTGTCT GAAAGCTCCC GAGGTTGAAA

*Physcomitrella patens* expansin PpEXPA6

+1 M P S I S S F E K N A D F K G S S F S T E T T L S T D D Q P D E V

1 ATGCCATCCA TCTCGAGTTT CGAAAAGAAC GCAGATTCA AGGGATCTTC TTTCAGCACG GAGACCACTC TGAGCACGGA TGACCAACCA GATGAGGTTT  
 TACGGTAGGT AGAGCTCAAA GCTTTTCTTG CGTCTAAAGT TCCCTAGAAG AAAGTCGTGC CTCTGGTGAG ACTCGTGCTC ACTGGTTGGT CTACTCCAAA

+1 F A R K A G Y A P V P R S Y G G V W R N A R S T F Y G G M D A A G T

101 TTGCCAGAAA GCGCCGGTAT GCTCCAGTTC CTAGGAGCTA TGGTGGAGTG TGGAGGAACG CAAGGTCTAC CTTCTACGGT GGAATGGATG CTGCGGGAAC  
AACGGTCTTT CCGGCCATA CGAGGTCAAG GATCCTCGAT ACCACCTCAC ACCTCCTTGC GTTCCAGATG GAAGATGCCA CTTTACCTAC GACGCCCTTG

+1 M INTRON #1 = 159 bp Phase = 1

201 CATGTGTAAG TTTTATTAGT GAATACGCCT GCAAGGATTC CATTGTCTTC GCCTTCATTA GTGTAAGGTT TGGATGTCGG CTTTCATTGT TTTCCCTTGT  
GTACACATTC AAAAATAAAC CTTATGCGGA CGTTCCTAAG GTAACAGAAG CGGAAGTAAT CACATTCCAA ACCTACAGCC GAAAGTAACA AAAGGGAACA

+1 S G A C G Y G N L Y A S

301 GGAGGTGTAG TTTTTTAGT ACGTACTGCG TCGGATTATC TTACTATGTT GCATGTTGAT GCAGCGGGAG CTTGTGGATA TGGCAATTTG TACGCTTCTG  
CCTCCACATC AAAAATCA TGCATGACGC ACGCTAATAG AATGATACCA CGTACAATA CSTCGCCCTC GAACACCTAT ACCGTTAAAC ATGCGAAGAC

+1 G Y G V H T T A L S S A L F K N G M A C G A C F E V Q C G G K G K P

401 GGTACGGTGT GCACACCACT GCCTTGTCTT CAGCCTTGTT CAAGAACGGA ATGGCTTTCG GCGCTTGTTC CGAGGTGCAG TCGGTGGGA AGGAAAAGCC  
CCATGCCACA CGTGTGGTGA CGCAACAGGA GTCGCAACAA GTTCTTGCCT TACCGAACGC CGCGAACAAA GCTCCACGTC ACGCCACCTT TCCCTTTCGG

+1 C K P G S V V V T A T N F C P P N P G Q S A N N G G W C N P P N E

501 CTGCAAACTT GGATCTGTGG TTGTGACCGC CACCAACTTC TGCCCAACCA ATCCAGGACA GAGTGCGAAC AATGGAGGAT GGTGCAATCC TCCTAATGAG  
GACGTTTGA CCTAGACACC AACACTGGCG GTGGTTGAAG ACGGTTGGGT TAGGTCCTGT CTCACGCTTG TTACCTCCTA CCACGTTAGG AGGATTACTC

+1 H F D L S Y P A F V K I A D P K A G A V P L Q Y R R INTRON #2 = 138 bp Phase

= 2

601 CACTTTGACC TTTCTACCC CGCTTTCGTT AAAATCGCCG ATCCCAAGGC TGGAGCTGTG CCCCTGCAAT ACCGAAGGTT CGTGCTATTT GCCTTAAAA  
GTGAAACTGG AAAGGATGGG GCGAAAGCAA TTTTAGCGGC TAGGGTCCG ACCTCGACAC GGGGACGTTA TGGCTTCAA GCACGATAAA CGGAAATTTT

701 ACITTTGTTG CTGGCTTGA CTGCTCTTTT TTTCCATCGT TATATTTCTC ACCTGGAAGT AGATGCAATG TTTCTTCTCA TGAACATAAG TGGTATCCGA  
TGAACAAAC GACCGAACT GACGAGAAA AAAGGTAGCA ATATAAAGAG TGGACCTTCA TCTACGTTAC AAAGAAGAGT ACTTGATTTC ACCATAGGCT

+1 V P C Q K Q G G I R F T I N G N C N F I L V T I T N V G

801 TGTGTCTGCA TTCAGAGTGC CGTGCCAGAA GCAAGGAGGG ATTCGATTTA CTATTAATGG CAACTGCAAC TTCATCCTCG TGACCATCAC CAACGTCGGC  
ACACAGAGCT AAGTCTCAG GCACGCTCTT CGTTCCTCCC TAAGCTAAAT GATAATTACC GTTGACGTTG AAGTAGGAGC ACTGTTAGTG GTTGCAGCCG

+1 G S G V V T A A Y L K G D K T E W S P L S R N W G A N W Q C R R N

901 GGTTCGGGAG TGGTGACTGC GCGTACTTG AAGGGCGACA AGACAGAGTG GTCTCCGTTG TCAAGAACT GGGGCGCGAA CTGGCAGTGC AGGCGCAATT  
CCAAGCCCTC ACCACTGAGC CCGCATGAAC TTCCCGCTGT TCTGTCTCAC CAGAGGCAAC AGTTCTTTGA CCCC GCGCTT GACCGTCAGC TCCGCGTTAA

+1 Y C G Q G I S I K I V T S D N K V S V T K L A K S D W C F G K T F I

1001 ACTGCGGTCA AGGTATCTCC ATCAAGATCG TCACCAGTGA CAACAAGGTT TCAGTCACGA AGCTAGCCAA ATCTGACTGG TGTTCGGGA AGACCTTCAT  
TGACGCCAGT TCCATAGAGG TAGTTCTAGC AGTGGTCACT GTTGTTCCAA AGTCAGTGCT TCGATCGGTT TAGACTGACC ACAAAGCCCT TCTGGAAGTA

+1 G K Q V

1101 CGGAAAGCAA GTC

GCCTTTCGTT CAG



SUPPLEMENTAL FIG. 7. Alignment of *Physcomitrella* EXPA sequences with selected *Arabidopsis*, rice and a *Populus* EXPA gene. Alignment made using the Clustal W algorithm as described in the Materials and Methods section.

```

-----+-----+-----+-----+-----+-----+-----+
          10          20          30          40          50          60
-----+-----+-----+-----+-----+-----+
1 WKEAHATFYEG - - - GSGTF - - - G - - - G - ACNYKDVAGQGYGMNTAALS SVL FKN GQAC PtEXPA26
1 WKIATAATLSRDRD GSSSVAT - - - G - - - G - ACGYGDLRQSSS FAGYSAGLSGKLFNRGSSC AtEXPA20
1 WRPARATY YAA TN - - PRDAV - - - G - - - G - ACGYGDLVKSGYGMATVGLSETL FER GQIC AtEXPA13
1 WIRAHATFYGVND - - SPASL - - - G - - - G - ACGYDNPYHAGFGAHTAALS GELFRSGESC AtEXPA12
1 WVNARATFYGGAD - - ASGTM - - - G - - - G - ACGYGNLYSQGYGTNTAALS T ALFN GGQSC AtEXPA14
1 WVNAHATFYGGSD - - ASGTM - - - G - - - G - ACGYGNLYSQGYGTNTAALS T ALFN NGLSC AtEXPA15
1 WQGGHATFYGGED - - ASGTM - - - G - - - G - ACGYGNLYGQGYGTNTAALS T ALFN NGLTC AtEXPA8
1 WYDARATFYGDIH - - GGDTQ - - - P - - - - - CGYGNLFRQGYGLATAALS T ALFN DGYTC AtEXPA22
1 WQNAHATFYGGSD - - ASGTM - - - G - - - G - ACGYGNLYSQGYGTNTAALS T ALFN N GMSC AtEXPA4
1 LTNGHATFYGGSD - - ASGTM - - - G - - - G - ACGYGDLYSAGYGTMTAALS T ALFN D GASC AtEXPA11
1 WLQAHATFYGGSD - - ASGTM - - - G - - - G - ACGYGNLYTDGYKTNTAALS T ALFN D GKSC AtEXPA17
1 WR YA HATFYGDET - - GG E TM - - - G - - - G - ACGYGNLFNSGYGLSTAA LST TLFN DGYGC AtEXPA7
1 WRMGSA TYI KESLGHPLNDG - - - - G - - - G - ACGYGDLDIFRYGRYTAGVSGALFGRGSA C OsEXPA16
1 WRS AKAS Y YAAD - - - PEDAI - - - - G - - - G - ACGFGDLGKHGYGMATVGLSTAL FERGAAC OsEXPA10

```

1 WSSAHATFYGGGD--ASGTM---G--G-ACGYGNLYSQGYGTNTAALSTALFNNGLS C OsEXPA5  
1 WSSGSATFYGGSD--ASGTM---G--G-ACGYGNLYSAGYGTSTAAALSTALFNNGQSC OsEXPA11  
1 WQSAHATFYGGGD--ASGTM---G--G-ACGYGNLYSQGYGTNTAALSTALFNDGAA C OsEXPA4  
1 WKQAHATFYGGRD--GSGTL---D--G-ACGYKDTSKEGYGVQTVAVSTPLFGAGAGC OsEXPA32  
1 WQSAHATFYGGSD--ASGTM---G--G-ACGYGNLYSQGYGVNNAALSTALFNNSGQSC OsEXPA7  
1 WTPATAATFYGGSD--GAGTM---G--G-ACGYGNLYNAGYGLNNAALSSALFNDGAMC OsEXPA33  
1 WTPAHATFYGDET--ASET M---G--G-ACGYGNLYASGYGTDTAALSTTLFKDGYGC OsEXPA30  
1 -LSGTATFYGGSD--ASGTM---G--G-ACGYGNLYSTGYGTNTAALSSALFNDGAA C OsEXPA12  
1 WRKAHATFYGGAD--ASGTM---G--G-ACGYGNLYSTGYGV DSTALSTALFNNGAKC PpEXPA1  
1 WKEAHITYYGTAN--GGGTQ---G--G-ACGYPNTFAMGYGVM TAA LS YPLFQGGKSC PpEXPA2  
1 SGVAHATFYGGVD--AQGTQ---G--G-ACGYGNLYSTGYGTSTTALSSALFNAGLS C PpEXPA3  
1 WKDAHITYYGS PN--GGGTQ---G--G-ACGYQNTYALGYGSFTAAALSAPLFQGGAA C PpEXPA4  
1 WGRAHATFYGGAD--ASGTQ---G--G-ACGYGNLYSTGYGTNTAALSSSLFN SGLSC PpEXPA5  
1 WRNARSTFYGGMD--AAGTM---S--G-ACGYGNLYASGYGVHTTALSSALFNKNGMAC PpEXPA6  
1 WTDAAHATFYGGAD--ASGTQGGCAG--G-ACGFGNLYSTGYGTNTAALSQA LFN SGLTC PpEXPA9  
1 WGRAHATY YGGAD--ASGTQ---G--G-ACGFGNLYSSGYGTD TAA LS S A L F N S G L S C PpEXPA11  
1 WNDAAHATY YGGAD--AS---G--G-ACGFGNLYSTGYGTSTAAALSQA LFN S G L T C PpEXPA12  
1 WNEARAATFYGGSD--AGGTT---G--G-ACGYGDLYSTGYGTNTVA TSSAIFDRGLAC PpEXPA13  
1 WDKGHATY YGED--ARGTM---G--G-ACGYSNLYSTGYGVNTAA LS GPLFN GGA TC PpEXPA14  
1 WGYAAHATY YGGAD--ASGTQ---G--GACGFGNLYSTGYGTNTAA LS A A L F N S G L S C PpEXPA15  
1 WDTAAHATY YGGRD--AGGTM---G--G-ACGYGNLYNTGYGVK TAA LS A P L F K G G A T C PpEXPA16

1 WGRAHATYYGGAD--ASGTQ---G---G-ACGFGNLYSSGYGTSTAAALSSSLFN SGLSC PpEXPA17  
1 WNEAHITYYGTAN--GGGTQ---G---G-ACGYPNTFAMGYGAMTAAALSYPLFQGGKAC PpEXPA18  
1 WGD A H I T Y Y G S P N - - G A G T E - - - - G - - - G - A C G Y Q N T Y K L G Y G S M T A A L S S R L F Q G G K A C PpEXPA19  
1 WKDAHITYYGSPN--GGGTQ---G---G-A--YQNTYALGY-PLTAAALSSPLFQGGAAAC PpEXPA20  
1 -RDAHITYYGSPN--GGGTE---G---G-ACGYQNTYSLGYGFMTAAALSSSLFQGGSSC PpEXPA21  
1 WQDAHITYYGSPN--GGGTQ---G---G-ACGYQNTVSLGYGFMTAAALSSPLFQGGKAC PpEXPA22  
1 WINGRITYYGSPN--GGGTQ---G---G-ACGYQNTVSLGYGFMTAAALSTTLFKGGAAC PpEXPA23  
1 WSSGRITYYGSPN--GGGTQ---G---G-ACGYQNTVSLGYGFMTAAALSTPLFNNGGAAC PpEXPA24  
1 WRDAHITYYGSPN--GGGTQ---G---G-ACAYQNTFSLGYGAMTAAALSSPLFEGGAAC PpEXPA25  
1 WNFGRITYYGSPN--GGGTQ---G---G-ACGYQNTFALGYGTNTAAALSSRLFQGGAAAC PpEXPA26  
1 WATAATATFYGGAD--AG-----G---G-ACGYGNLYSTGYGASTTALSAPLVNGGSAAC PpEXPA27  
1 WGYAHATYYAGAD--ASGTQ---G---GGACGFGNLYSTGYGTNTAAALSAALFN SGLSC PpEXPA7  
1 WNEAHATFYGGSD--AGGTT---GTRGG-ACGYGDLYSTGYGTSTVAISSALFDRGLAC PpEXPA8  
1 SGRAHATFYGGAD--ASGTQ---G---G-ACGYGNLYSTGYGTSTAAALSSALFN SGLSC PpEXPA10

```

-----+-----+-----+-----+-----+-----+
              70              80              90              100             110             120
-----+-----+-----+-----+-----+-----+
49 G A C F E I K C A D N P - - - - - Q W C K L G Q P S L I V T A T D H C P P N P S L P N D - - N G G W C N V P R E PtEXPA26
53 G A C L E V R C V N H I - - - - - R W C L Q G S P S V V V T A T D F C P P N S G L S S D - - Y G G W C N F P K E AtEXPA20
51 G A C F E L R C V D D L - - - - - R W C I P G T - S I I L T A T N F C A P N Y G F D P D - - G G G H C N P P N K AtEXPA13
51 G G C Y Q V R C D F P A - D - - - - - P K W C L R G A - A V T V T A T N F C P - - - - T N N - - N N G W C N L P R H AtEXPA12
51 G A C F Q I K C V D D P - - - - - K W C I G G - - T I T V T G T N F C P P N F A Q A N N - - A G G W C N P P Q H AtEXPA14
51 G A C F E I K C Q S D G - - - - - A W C L P G - - A I I V T A T N F C P P N N A L P N N - - A G G W C N P P L H AtEXPA15
51 G A C Y E M K C N D D P - - - - - R W C L G S - - T I T V T A T N F C P P N P G L S N D - - N G G W C N P P L Q AtEXPA8
49 G A C Y E I M C T R D - - - - - P Q W C L P G S - - V K I T A T N F C P A N Y S K T T D - - - L W C N P P Q K AtEXPA22
51 G A C F E L K C A N D P - - - - - Q W C H S G S P S I L I T A T N F C P P N L A Q P S D - - N G G W C N P P R E AtEXPA4
51 G E C Y R I T C D H A A - D - - - - - S R W C L K G A - S V V I T A T N F C P P N F A L P N N - - N G G W C N P P L K AtEXPA11
51 G G C Y Q I L C D A T K - V - - - - - P Q W C L K G K - S I T I T A T N F C P P N F A Q A S D - - N G G W C N P P R P AtEXPA17
51 G Q C F Q I T C S K S - - - - - P - H C Y S G K - S T V V T A T N L C P P N W Y Q D S N - - A G G W C N P P R T AtEXPA7
53 G G C Y E V R C V N H V - - - - - L W C L R G S P T V V V T A T D F C A P N L G L S D D - - Y G G W C N F P K E OsEXPA16
50 G G C Y E V K C V D D L - - - - - K Y C L P G T - S I V V T A T N F C A P N F G L P A D - - A G G V C N P P N H OsEXPA10
51 G A C F E V R C D A G G G G - - - - - S H S C L P G - - S V V V T A T N F C P P N N A L P S D - - D G G W C N P P R A OsEXPA5
51 G A C F E V R C G G G G - - - - - S C L A G - - T V A V T A T N L C P P N Y A L A G D - - A G G W C N P P R P OsEXPA11
51 G S C Y E L R C D N A G - - - - - S - S C L P G - - S I T V T A T N F C P P N Y G L P S D - - D G G W C N P P R P OsEXPA4

```

51 G A C Y E V K C V D S P - - - - - D G C K V G A A P L V V T A T N L C P P N P G Q S N D - - N G G W C N P P R E OsEXPA32

51 G A C F E I K C V N Q P G - - - - - W E W C H P G S P S I L I T A T N F C P P N Y A L P S D - - N G G W C N P P R P OsEXPA7

51 G A C Y T I A C D T S - - Q - - - - - S T W C K P G T - S I T I T A T N L C P P N Y A K K S D - - A G G W C N P P R K OsEXPA33

51 G T C Y Q M R C V G T - - - - - A - S C Y R G S P A I T V T A T N L C P P N W A E D P D R G G G W C N P P R A OsEXPA30

50 G E C Y Q I T C D Q S - - N - - - - - S K W C K A G T - S V T I T A T N L C P P D Y S K P S N - - D G G W C N P P R Q OsEXPA12

51 G A C F A I Q C Y R S Q - - - - - Y C V P G S P V I T V T A T N F C P P N H K - G D G - - T P G W C N P P M R PpEXPA1

51 G A C Y Q L K C K W L A P T R T - - - V H N W C W S Y S R T I T I T A T N S C P P G - - - S H - - - G G W C D W - K P PpEXPA2

51 G A C F E L K C D S A N - - - - - S K Y C L P G D K S I T V T A T N Y C P Q G - - - S D - - - G G W C D S P K Q PpEXPA3

51 G G C Y Q L K C A P V R E T R T - - - V H N W C W S Y S R S I V V T A T N L C P P G - - - S H - - - G G W C A W - R P PpEXPA4

51 G A C Y E L T C D P S C - - - - - S Q Y C L P G G - S A I I T A T N F C P T G - - - S N - - - G G W C N P P K Q PpEXPA5

51 G A C F E V Q C G G K G - - - - - K P C K P G S - - V V V T A T N F C P P N P G Q S A N - - N G G W C N P P N E PpEXPA6

55 G A C F E L V C D S S G - - - - - S R Y C V T S S - S V V V T A T N F C P T G - - - S T - - - G G W C D Y P R Q PpEXPA9

51 G A C Y E L T C D P S G - - - - - S K F C I P G G - S A I I T V T N F C P T G - - - S N - - - G G W C N P P K Q PpEXPA11

48 G A C F E L A C D P S G - - - - - S K Y C Y K G S - S I V V T A T N F C P S G - - - S E - - - G G W C D S P K Q PpEXPA12

51 G A C Y Q V K C A G S A - - - - - S E C Q P G T P A I Q V T V T N F C P P N P S L P E G - - N G G W C N L P L H PpEXPA13

51 G A C Y E L T C I L N E - - - - - S K W C Y R G K - N I I V T A T N F C P S G - - - S T - - - G G W C N P P Q K PpEXPA14

52 G S C Y E L A C D P N G - - - - - S K Y C L P G G R T V T V T A T N F C P H G - - - S L - - - G G W C D S P K Q PpEXPA15

51 G A C Y E L T C I L S Q - - - - - S K Y C Y Q N K - K I L I T A T N F C P T G - - - S T - - - G G W C N P P R K PpEXPA16

51 G A C Y E L T C D P S G - - - - - S Q Y C L P G G - S A I I T V T N F C P T G - - - S N - - - G G W C N P P R Q PpEXPA17

51 G G C Y Q L R C K W V T P T R T - - - V H N W C W S Y S R T I T V T A T N S C P P G - - - S H - - - G G W C N W - R P PpEXPA18

51 G G C Y Q L R C A P N R G - - - - - R N W C W S Y A R A I V V T A T N L C P Q G - - - S H - - - G G W C D Y P K S PpEXPA19

48 E S C Y Q L K C A L V R A S - I - - - A R N W C W N Y F R T I V V T A T N L C P R G - - - - S H - - - G G W C D Y - R P PpEXPA20  
50 G A C Y Q I R C E P I R V T R T - - - V K N W C W S Y S R T I T V T A I N L C P P R - - - - S S - - - G G C C N P P L Q PpEXPA21  
51 G A C F Q L Q C A R V Q E T R T - - - V K N W C H D Y S K A I T V T A T N L C P P G - - - - S E - - - G T W C D P P R H PpEXPA22  
51 G A C Y Q L Q C A P V S E T P S G L L K R N W C W Q V G R S I L V T A T N L C P P G - - - - S S - - - G G W C N P P Q H PpEXPA23  
51 G A C Y Q L Q C A P V H E T P K N L L Q R N W C W K V G R R I T I T A T N L C P P G - - - - S E - - - G G W C D P P Q H PpEXPA24  
51 G A C Y Q L Q C K R V Q E T R T - - - V K N W C W S Y S R T I T I T A T N L C P P G - - - - S A - - - G A W C D P P R H PpEXPA25  
51 G A C Y Q L R C I A P K W G - - - - - K N W C W N Y A R S I V V T A T N L C P S G - - - - S N - - - G G W C P S - Q A PpEXPA26  
48 G A C Y Q L Q C A R - - - - - - - - - S N H C Y A G R - S I T V T A T N F C P T G - - - - S E - - - G G W C N P P R K PpEXPA27  
52 G S C Y E L A C D P N G - - - - - - - S K Y C L P G G P T V T V T A T N F C P H G - - - - S L - - - G G W C D A P K Q PpEXPA7  
54 G A C Y Q V K C A G S S - - - - - - - S E C R S D S P A I Q V T V T N F C P P N P S L P E D - - N G G W C N L P L H PpEXPA8  
51 G A C Y E L T C D T S G - - - - - - - S K Y C L P G N P S I I L T A T N Y C P Q N - - - - S N - - - G G W C D A P K Q PpEXPA10

```

-----+-----+-----+-----+-----+-----+
                130             140             150             160             170             180
-----+-----+-----+-----+-----+-----+

98 HFDVAKPVFSQLAEY - EAGIIPIQYRRVPCQKQGGIRFTILGNPWFYQVI VWNVGGAGDV PtEXPA26
102 HLELSHAAFTGIAET - RAEMIPIQYRRVKCGRRGGLRFSLSGSSHFQVLI SNVGLDGEV AtEXPA20
99 HFVLP IEA FEKIAIW - KAGNMPVQYRRINCRKEGSMRFTVDGGGIFISVLI TNVAGSGDI AtEXPA13
96 HFDMSSPAFFRIARRGNEGIVPVFYRRVGCRRRGVRFRTMRGQGNFNMVMISNVGGGGSV AtEXPA12
98 HFDLAQPIFLRIAQY - KAGVVPVQYRRVACRRKGGIRFTINGHSYFNLVLI TNVAGAGDV AtEXPA14
98 HFDLSQPVFQRIAQY - KAGVVPVSYRRVPCMRRGGIRFTINGHSYFNLVLV TNVGGAGDV AtEXPA15
98 HFDLAEPAFLQIAQY - RAGIVPVSFRRVPCMKKGGIRFTINGHSYFNLVLI SNVGGAGDV AtEXPA8
94 HFDLSLAMFLKIAKY - KAGVVPVRYRRI PCSKTGGVKFETKGNPYFLMVLI YNVGGAGDI AtEXPA22
100 HFDLAMPVFLKIAQY - RAGIVPVSYRRVPCRKRGGIRFTINGHRYFNLVLI TNVAGAGDI AtEXPA4
101 HFDMAQPAWEKIGIY - RGGIVPVVFQRVSCYKKGGVRFRINGRDYFELVNI QNVGGAGSI AtEXPA11
101 HFDMAQPAFLTIAKY - KAGIVPILYKKVGCRRSGGMRFTINGRNYFELVLI SNVAGGGEI AtEXPA17
98 HFDMAKPAFMKLAYW - RAGIIPVAYRRVPCQRS GGMRFFQFQGN SYWLLIFVMNVGGAGDI AtEXPA7
102 HFEMSEAAFLRVAKA - KADIVPVQFRRVSCDRAGGMRFTITGGASF LQVLI TNVAADGEV OsEXPA16
98 HFLLPIQSFEKIALW - KAGVMPIQYRRVNCLRDGGVRF AVAGRSFFLTVLI SNVGGAGDV OsEXPA10
101 HFDMSQPVFQRIALF - KAGIVPVSYRRVACQKKGGIRFTINGHSYFNLVLV TNVGGAGDV OsEXPA5
97 HFDMAEPAFTRIAQA - RAGVVPVQYRRVACA KQGGIRFTITGHSYFNLVLV TNVGGAGDV OsEXPA11
98 HFDMAEPAFLHIAQY - RAGIVPVSFRRVPCVKKGGVRF TVNGHSYFNLVLV TNVAGAGDV OsEXPA4

```

100 HFDLSMPAFLQIAQE - KAGIVPISYRRVPCVKVGGIRYTTITGNPYFNLVMSNVGGAGDV OsEXPA32  
102 HFDLAMPFLHIAEY - RAGIVPVSYRRVPCRKKGGVRFRTINGFRYFNLVLIITNVAGAGDI OsEXPA7  
100 HFDMSQPAWTSIAIY - QAGIVPVNFKRVPCKKSGGIRFTISGRDYFELVTVFNVGGSGVV OsEXPA33  
101 HFDLSKPAFMRMADW - RAGIVPVMYRRVPCARAGGLRFALQGNPYWLLAYVMNVAGAGDV OsEXPA30  
99 HFDMAQPAWEQIGVY - RGGIVPVNFQRVSCTRKGGVRFRTINGNSYFELVLIITNVGGPGSI OsEXPA12  
98 HFDLAQPSFTKIAKY - RAGIVPVLFRRVPCCKKGGVRFRTINGNKYFNLVLVHNVGGKGDV PpEXPA1  
100 HFDLPMPAFMTLARR - EGGVAPVYRKRVC AKRGGIRFTLGGNPYFMMILIHNVGGAGDL PpEXPA2  
96 HFDLSHPMFTSLAQE - VGGVIVPTYRRAPCAKKGGMRFRTINGNPWFVMI LVTNCGGAGDV PpEXPA3  
100 HFDLPMPAFMTSLAKQ - VGGVAPVFYRRVRC AKRGGVRFRTIGGNPYFLMVLIHNVGGAGDI PpEXPA4  
95 HFDLAQPVFSKIART - VGGVIPINYRRVPCSKSGGMRFRTVNGNPYFLV LVTNVGGAGDV PpEXPA5  
98 HFDLSYPAFVKIADP - KAGAVPLQYRRVPCQKQGGIRFTINGNCNFILV TITNVGGSGVV PpEXPA6  
99 HFDLSQPVFTRIAQP - VGGVVT LKYRRVRCQKSGGIRFTITGNPYFILV LVTNVGGAGDV PpEXPA9  
95 HFDLAQPVFRKIART - VGGVVPINYRRVSC LKDGGMRFRTVNGNPYFLV LVTNVGGAGDV PpEXPA11  
92 HFDLSQPVFNKIAQQ - AGGVIVPKYRRVPCRKSGGMRFRTINGNPYFILV LVTNVGGAGDV PpEXPA12  
100 HFDMAMP AFQQIASY - RVGIVPILYRRASCVR TGGIRFTMSGHKFMNLV LVTNVGGMGDV PpEXPA13  
95 HFDLSEPMFTTLANR - VGGVIVPNFRRVAC YKQGGMRFTINGNPYFFIVLV YNVAGAGDV PpEXPA14  
97 HFDLAHPMFVTLAKE - VGGVIPIKFRRVPCVKSGGMHFTINGNPWFLLV LVTNVAGAGDL PpEXPA15  
95 HFDLSEPMFTTLANR - VGGVIVPNFRRVH CYKKGGMRFRTINGNPYHMMVLV YNVAGAGDV PpEXPA16  
95 HFDLAQPVFSKIART - VGGVIPINYRRVSC LKSGGMRFRTVNGNPYFLV LVTNVGGAGDV PpEXPA17  
100 HFDLPMPAFLTLARR - EGGVAPVYRKRVC AKRGGIRFTIGGNPYFLMIL IHNVGGAGDL PpEXPA18  
97 HFDLPMPAFMTSLARR - EGGVAPVWYRKRVC AKRGGVRFRTIGGNPWF LVMVLIHNVGGAGDV PpEXPA19



96 HFDLPMPAFTALARR - EGGVAPVFYRRVKCVKRGGVRFITIGGNPYFTMILIDNVGGAGDI PpEXPA20  
100 HFDLPMPAFLSLARR - EGGVAPVYT - KVRSEKRGGIRFTMGGNLWFLTILIHNVGGAGDV PpEXPA21  
101 HFDLPMPAFLSLARQ - EGGVAPVYRRVQCLKKGIRFTMGGNPWFLMVLVHNVAGAGDV PpEXPA22  
104 HFDLPMPAFLALARR - EGGVVPVYRKYVNCARKGGIRFTVGGNPWFLLMILIHNVGGAGDV PpEXPA23  
104 HFDLPMPAFTALAKR - EGGVVPVIYRRVRCAKQGGIRFTMGGNPWFLMILIHNVAGAGDV PpEXPA24  
101 HFDLTMPAFLT LARR - EGGVAPVLYRRVKCVKRGGIRFTIGGNPWFLMILIHNVAGAGDV PpEXPA25  
97 HFDWPMPAFTSLARK - EGGVTPIMYRRVRCAARRGGIRFTIGGNPFFLMVLIHNVGGAGDV PpEXPA26  
90 HFDLSMPMFTTLARQ - VAGVVPVDYRRVACNKKGGQRFLMTGNPYFIMVLYNVAGAGDV PpEXPA27  
97 HFDLAHPMFVSLARE - VGGVIPIKYRRVPCVKSGGMRFTINGNPWFLLVLVTNVAGAGDV PpEXPA7  
103 HFDMSMPAFEQIATY - KAGIVPVMYRRRTSCVRTGGIHFTMSGHNFMLVLLVTNVGGMGDV PpEXPA8  
96 HFDLAHPMFVSLAEE - RGGVIPVNYRRVPCAKKGGMRFQMNGNPWFLLVLVTNVGGAGDV PpEXPA10

```

-----+-----+-----+-----+-----+-----+
                190                200                210                220                230                240
-----+-----+-----+-----+-----+-----+
157 V G V Q V K - G D D K L K W T Q M E R D W G T T W K T S A I - - - L L G E S L S F R V S A - S D D R D S T S W H V T P K PtEXPA26
161 V G V K V K - G H - T T A W I P M A R N W G Q N W H S S L D - - - L I G Q S L S F E V T L - K G G K T I A S Y D V A P P AtEXPA20
158 A A V K I K - G S - R T G W L P M G R N W G Q N W H I N A D - - - L R N Q A L S F E V T S - S D R S T V T S Y N V S P K AtEXPA13
156 R S V A V R - G S K G K T W L Q M T R N W G A N W Q S S G D - - - L R G Q R L S F K V T L - T D S K T Q T F L N V V P S AtEXPA12
157 I S V S I K - G T N T R - W Q S M S R N W G Q N W Q S N A K - - - L D G Q A L S F K V T T - S D G R T V I S N N A T P R AtEXPA14
157 H S V A V K - G S R T R - W Q Q M S R N W G Q N W Q S N N L - - - L N G Q A L S F K V T A - S D G R T V V S N N I A P A AtEXPA15
157 H A V S I K - G S K T Q S W Q A M S R N W G Q N W Q S N S Y - - - M N D Q S L S F Q V T T - S D G R T L V S N D V A P S AtEXPA8
153 K Y V Q V K - G N K T G - W I T M K K N W G Q N W T T I T V - - - L T G Q G L S F R V T T - S D G I T K D F W N V M P K AtEXPA22
159 V R A S V K - G S R - T G W M S L S R N W G Q N W Q S N A V - - - L V G Q A L S F R V T G - S D R R T S T S W N M V P S AtEXPA4
160 K S V S I K - G S K T G - W L A M S R N W G A N W Q S N A Y - - - L D G Q A L S F S I T T - T D G A T R V F L N V V P S AtEXPA11
160 S K V W I K - G S K S N K W E T M S R N W G A N Y Q S N T Y - - - L N G Q S L S F K V Q L - S D G S I K A A L N V V P S AtEXPA17
157 K S M A V K - G S R T N - W I S M S H N W G A S Y Q A F S S - - - L Y G Q S L S F R V T S Y T T G E T I Y A W N V A P A AtEXPA7
161 A A V K V K - G S - R T G W I P M G R N W G Q N W Q C D A D - - - L R G Q P L S F E V T G - G R G R T V V A Y S V A P P OsEXPA16
157 R S V K I K - G T - E S G W L S M G R N W G Q I W H I N S D - - - F R G Q P L S F E L T S - S D G K T L T N Y N V V P K OsEXPA10
160 H A V A V K - S E R S A A W Q A L S R N W G Q N W Q S A A L - - - L D G Q A L S F R V T T - G D G R S V V S N N A V P R OsEXPA5
156 T A V S V K - G S R - S G W Q A M S H N W G A N W Q N G A N - - - L D G Q P L S F R V T A - S D G R T V T S D N V A P S OsEXPA11
157 R S V S I K - G S R - T G W Q P M S R N W G Q N W Q S N A F - - - L D G Q S L S F Q V T A - S D G R T V T S N N V A H P OsEXPA4

```

159 A G L S V K - G N K R V K W T P L K R N W G Q E W Q T S E V - - - L T G E S L T F R V M T - G D H R K A T S W H V L P P OsEXPA32

161 V R A S V K - G T S - T G W M P M S R N W G Q N W Q S N S V - - - L V G Q A L S F R V T G - S D R R T S T S W N A A P A OsEXPA7

159 A Q V S I K - G S K T D - W M A M S R N W G Q N W Q S N A Y - - - L N T Q S L S F K V K L - D D A R E V T V W N I A P S OsEXPA33

160 G D M W V K A G G G G - W V R M S H N W G A S Y Q A F A Q - - - L G G Q A L S F K V T S Y T T G Q T I L A A G V T P A OsEXPA30

158 K S V Q I K - G T K T G - W V T M S R N W G A N W Q A N N Y - - - L N N Q A I S F S V T S - T A G K T L V F E D V A P S OsEXPA12

157 H A V D I K - G S N - T E W I P M K R N W G M N W Q T D A V - - - M T G Q A L S F R V T T - S D G K T I V S M N A T P S PpEXPA1

159 R A V K I K - G R - N G Y W V P M W Q N W G A L W T C K T K - - - L S G - A L S F Q I T T - G D G R T V T V N R A - - V PpEXPA2

155 Q Q L Q I R - G S - D T P W Y P C V R N W G Q M W Q M T S D P N - L P G K A L S F R A T L - S D G S V A E S L N A A P S PpEXPA3

159 R S V R I K - G Q - Y S G W V T M F R N W G S L W T C R T K - - - L S G - P L S F M I T T - S D G R T L V S N R A - - V PpEXPA4

154 Q Q L Y I K - G A - S T G W L P L K R N W G Q M W Q F T G N S G - M H G Q A I S F K A V T - S D G A E A I S P N V A P A PpEXPA5

157 T A A Y L K - G D - K T E W S P L S R N W G A N W Q C R R N - - - Y C G Q G I S I K I V T - S D N K - V S V T K L A K S PpEXPA6

158 Q Q L Y I K - G S - S T G W N A M S R N W G Q L W E I R - N A A - L M G Q A L S F R V V T - S D R A E V A S F D A V P A PpEXPA9

154 Q Q L Y M K - G S - S T N W Q P L K R N W G Q M W Q F T G N S R - M H G Q A I S F K A V T - S D G S V A V S N N V A P P PpEXPA11

151 Q Q L S L K - G S - S T G W Y T M S R N W G Q Q W E F R G N S A - L V G Q A L S F R V V T - S D G A E A V S Y D A A S E PpEXPA12

159 Q T V F I Q - G S - K T K L V A M I R N F G Q I W Q S S V N - - - V S G Q R L S F M V M T - S D G E S V V S R N V A P S PpEXPA13

154 Q Q V Y I K - G P - K T Q W L Q M Y R N W G S Q W T F N G G P N N I V G S A L S F R V H T - S D G R Q V I S Y N A A P A PpEXPA14

156 Q Q V Y I K - G S - N T P W E P M S R N W G S M W Q F T G N S K - M K G Q A L S F K T I T - S D G A V A I S Y D A A P N PpEXPA15

154 Q Q M F I K - S P - T T G W L Q M S R N W G Q I W T Y K G G P R N I V G F A L S F R V Y T - S D R R Q V V S Y N A A P A PpEXPA16

154 Q Q L Y I K - G S - S T A W L P L K R N W G Q M W Q F T G N S G - M H G Q A I S F K A V T - S D G A E A I S N N V A S S PpEXPA17

159 K A V K V R - G G - N G Y W V P M W R N W G A L W T C K T R - - - M S G - A L S F Q I T T - G D G R T L T T Y K A - - V PpEXPA18

156 V S V K V K - C P - Y T G W V S A Y R N W G C L W T V R T K - - - M T G - P L S F T L V T - S D G R T L Y S M N A V R N PpEXPA19

155 R S M R V K - G Q - Y G G W V N I F R N W G S I R T C R T K - - - V A G - A L S F M I T T - T D G R S I V S N R A A N V PpEXPA20  
158 R S V R I K - S P - H S G L I S M Y R N W G S L W T V R A R - - - M S G - A L F F M I T T - S H G R V L I T R N A - - V PpEXPA21  
160 V P V K V K - C P - S S G W Y D M Y R N W G A L W T V Q K K - - - M V G - P L S F L L T T - G D G R R L T A Y N A - - V PpEXPA22  
163 V A V K V K - C P - T S G W Y D M Y R N W G A L W T V Q K K - - - M N G - P L S F A I T T - S D G R T V T T Y N A - - V PpEXPA23  
163 V A V K I K - C P - T S D W C D M Y R N W G A F W T V Q K K - - - M E G - P L S F Q I T T - S D R R K V T T H N A - - V PpEXPA24  
160 R A V R I K - T P - S T D W I P M Y R N W G A L W T V Q R K - - - L S G - P L S F Q I T A - G D R R Q I T I N S A - - V PpEXPA25  
156 R A V S I K - G Q - Y T G W V G M Y R N W G S L W T C T T K - - - I D G - A L T F R I T T - G D G K T L I L Y N A V R K PpEXPA26  
149 Q R F F V K - G S - M T G W Y E L R R N W G Q I W T C T A D S R - L K G Q A L S F R T Q T - S D G R Q V V S I D A A P A PpEXPA27  
156 Q H M Y I K - G S - N T P W E P M S R N W G S M W Q F T G D S K - M K G Q A L S F K A V T - S D G S V A V S M D A A P G PpEXPA7  
162 Q S V S I R - G S - K T S W V T M T R N F G Q I W Q S T V N - - - M S G Q S L S F M V T T - S D G K T V V S N N V A P P PpEXPA8  
155 Q Q L S I K - G S - N S G W Y Q M K R N W G Q M W Q L T G N S N - M P G Q A L S F R A V L - S D G T T V E S L D A A P A PpEXPA10

|     | 250 | 260     | 270 | 280   | 290         |          |
|-----|-----|---------|-----|-------|-------------|----------|
| 212 | N   | W Q F G |     | Q T Y | E G         | PtEXPA26 |
| 215 | Y   | W R F G |     | M T Y | Q G K Q     | AtEXPA20 |
| 212 | N   | W N Y G |     | Q T F | E G K Q     | AtEXPA13 |
| 211 | S   | W W F G |     | Q T F | S S R G R Q | AtEXPA12 |
| 211 | N   | W S F G |     | Q T Y | T G K Q     | AtEXPA14 |
| 211 | S   | W S F G |     | Q T F | T G R Q     | AtEXPA15 |
| 212 | N   | W Q F G |     | Q T Y | Q G G Q     | AtEXPA8  |
| 207 | N   | W G F G |     | Q T F | D G R I N   | AtEXPA22 |
| 213 | N   | W Q F G |     | Q T F | V G K N     | AtEXPA4  |
| 214 | S   | W S F G |     | Q I Y | S S N V Q   | AtEXPA11 |
| 215 | N   | W R F G |     | Q S F | K S N V N   | AtEXPA17 |
| 212 | N   | W S G G |     | K T Y | K S T A N   | AtEXPA7  |
| 215 | D   | W M F A |     | Q T F | E G K Q     | OsEXPA16 |
| 211 | E   | W D F G |     | K T Y | T G K Q     | OsEXPA10 |
| 215 | G   | W S F G |     | Q T F | S G A Q     | OsEXPA5  |
| 210 | G   | W S F G |     | Q T F | S G G Q     | OsEXPA11 |
| 211 | G   | W Q F G |     | Q T F | E G G Q     | OsEXPA4  |

|     |                                                           |          |
|-----|-----------------------------------------------------------|----------|
| 214 | D - - - - - W Q F G - - - - - V T Y - - - - - Q A T K N   | OsEXPA32 |
| 215 | G - - - - - W H F G - - - - - Q T F - - - - - E G K N     | OsEXPA7  |
| 213 | N - - - - - W N F G - - - - - T T Y - - - - - T S N I N   | OsEXPA33 |
| 216 | S - - - - - W C F G - - - - - L T Y - - - - - Q A R V N   | OsEXPA30 |
| 212 | N - - - - - W Q F G - - - - - Q T F - - - - - T S G V Q   | OsEXPA12 |
| 211 | H - - - - - W S F G - - - - - Q T F - - - - - E G G Q     | PpEXPA1  |
| 210 | G - - - - - D Y W K F G - - - - - Q T W - - - - - E G S Q | PpEXPA2  |
| 211 | N - - - - - W G W G - - - - - Q T F - - - - - E G V A     | PpEXPA3  |
| 210 | G - - - - - S W W K F G - - - - - Q T W - - - - - E G S Q | PpEXPA4  |
| 210 | N - - - - - W G F G - - - - - Q T F - - - - - E G S N     | PpEXPA5  |
| 210 | D - - - - - W C F G - - - - - K T F - - - - - I G K Q     | PpEXPA6  |
| 213 | N - - - - - W A F S - - - - - Q T F - - - - - E G S N     | PpEXPA9  |
| 210 | N - - - - - W G F G - - - - - Q T F - - - - - E G T L     | PpEXPA11 |
| 207 | N - - - - - W S F S - - - - - Q T F - - - - - E G I N     | PpEXPA12 |
| 213 | D - - - - - W A Y G - - - - - Q T Y - - - - - E G S Q     | PpEXPA13 |
| 211 | N - - - - - W W F G - - - - - Q T F - - - - - S S G A     | PpEXPA14 |
| 212 | N - - - - - W Q F G - - - - - Q T F - - - - - E G V N     | PpEXPA15 |
| 211 | N - - - - - W R F G - - - - - Q T F - - - - - S S G A     | PpEXPA16 |
| 210 | N - - - - - W G F G - - - - - Q T F - - - - - E G S N     | PpEXPA17 |
| 210 | G - - - - - G Y W R F G - - - - - Q T W - - - - - E G S Q | PpEXPA18 |
| 209 | G - - - - - W K F G - - - - - Q T W - - - - - E G S Q     | PpEXPA19 |

|     |                                                                                                           |          |
|-----|-----------------------------------------------------------------------------------------------------------|----------|
| 208 | G G L P V Q I V P L G P I A I L S L S R K G P F R S K L N D A P R T L M C L Q E W P V R P R E A D R S P R | PpEXPA20 |
| 209 | G - - - - - S G W R F G - - - - - Q T W - - - - - E G N                                                   | PpEXPA21 |
| 211 | G - - - - - N G W T F G - - - - - Q T W - - - - - E G A Q                                                 | PpEXPA22 |
| 214 | G - - - - - N G W K F G - - - - - Q T W - - - - - E G A Q                                                 | PpEXPA23 |
| 214 | G - - - - - H G W Q F G - - - - - Q T W - - - - - E G A Q                                                 | PpEXPA24 |
| 211 | G - - - - - N A W K F G - - - - - Q T W - - - - - E G H N                                                 | PpEXPA25 |
| 209 | G - - - - - W R F G - - - - - Q T W - - - - - E G S Q                                                     | PpEXPA26 |
| 205 | N - - - - - W N F G - - - - - Q T F - - - - - S S G V                                                     | PpEXPA27 |
| 212 | N - - - - - W Q F G - - - - - Q T F - - - - - E G V N                                                     | PpEXPA7  |
| 216 | D - - - - - W A F G - - - - - Q T Y - - - - - E G S Q                                                     | PpEXPA8  |
| 211 | N - - - - - W H F G - - - - - Q M F - - - - - E G S Q                                                     | PpEXPA10 |

Supplemental Fig. 8. Alignment of *Physcomitrella* EXPB sequences with selected *Arabidopsis* and rice EXPB genes. AtEXPA1 is included as a root. Alignment made using the Clustal W algorithm as described in the Materials and Methods section.

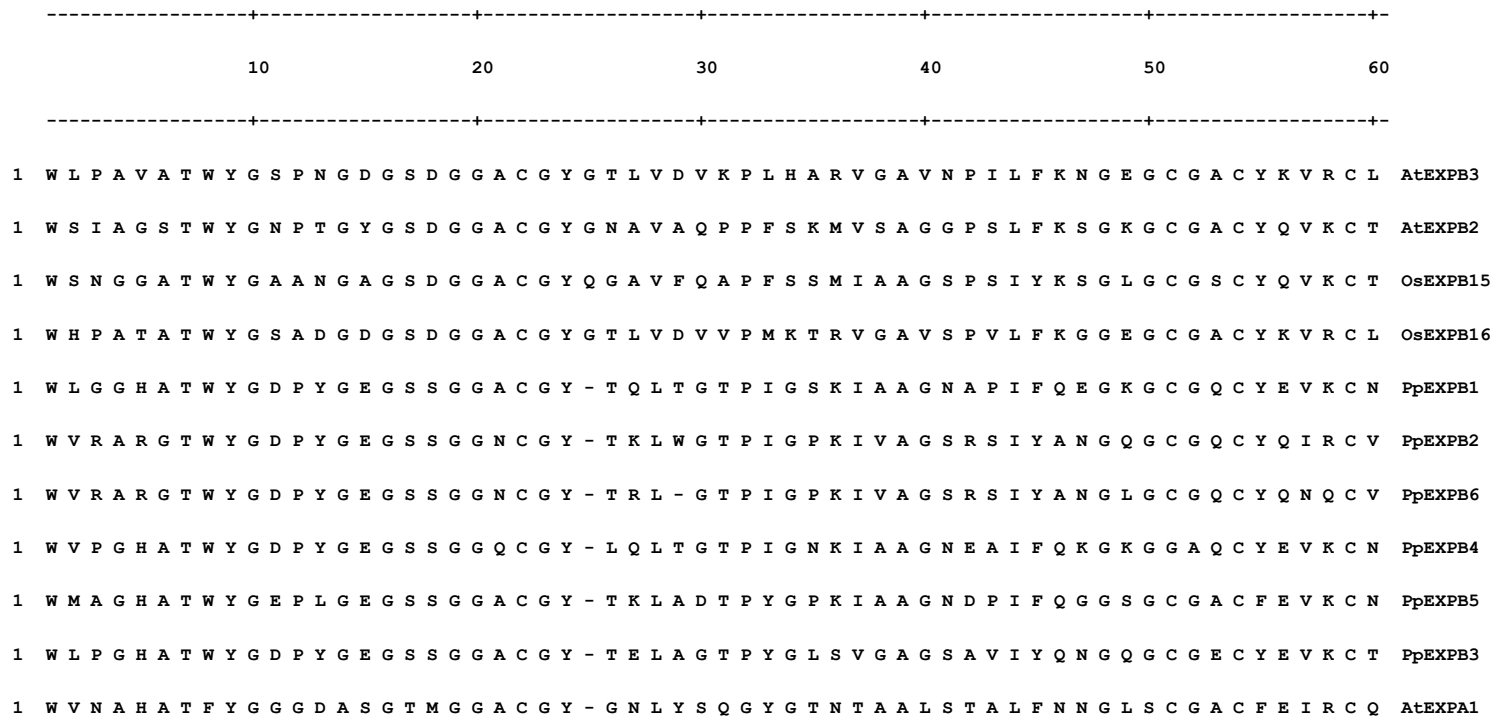



-----+-----+-----+-----+-----+-----+  
70 80 90 100 110 120  
-----+-----+-----+-----+-----+-----+

61 D K S - - - - I C S R R A V T V I I T D E C P - - - - - - - G - - - C S K T S T H F D L S G A V F G R L A I A G E S AtEXPB3  
61 S K S - - - - A C S K N P V T V V I T D E C P - - - - - - - G - - - C V K E S V H F D L S G T A F G A M A I S G Q D AtEXPB2  
61 G N S - - - - A C S G N P V T V V L T D E C P - - - - - - - G G - P C L S E P V H F D L S G T A F G A M A N P G Q A OsEXPB15  
61 D A S - - - - I C S R R A V T V I V T D E C P - - - - - - - G G - V C A F G R T H F D L S G A A F A R L A V A G H G OsEXPB16  
60 Y P S - - - - C S P Q G T R I V I T D L C P - - - - - - - G G Q Y C S T D Q P A F D F S G A A I T A M A L P G R D PpEXPB1  
60 D P N G G P R L C N P Q G T N V V V T D F C P - - - - - - - G G T Y C S T G E N A F D M S G A A I N A M A L R G R E PpEXPB2  
59 D P S Q G T K L G N S F S T Q V A V T D F C P - - - - - - - G G T Y C S T G E N A F D M S G A A I N A M A L P S R E PpEXPB6  
60 Y P V - - - - C R P E G T R I V I T D L C P - - - - - - - G A Q F C S G G N P A F D L S G A A I S A M A K D G Q D PpEXPB4  
60 Y P S - - - - C K S E P T R I I I T D Q C P - - - - - - - G G T Y C S T S Q P A F D L S G A A I S D M A V S G K D PpEXPB5  
60 Y P S - - - - C K P T P S R I V I T D F C P - - - - - - - G G T F C S T G E P A F D L S G M A M T N M A L P G R D PpEXPB3  
60 N D G - - - K W C L P G S I V V T A T N F C P P N N A L P N N A G G - W C N P P Q Q H F D L S Q P V F Q R I A - - - - AtEXPA1

-----+-----+-----+-----+-----+-----+  
130 140 150 160 170 180  
-----+-----+-----+-----+-----+-----+

105 G P L R N R G L I P V I Y R R T A C K Y R G K N I A F H V N E G S T D F W L S L L V E F E D G E G D I G S M H I R Q A G AtEXPB3  
105 S Q L R N V G E L Q I L Y K K V E C N Y I G K T V T F Q V D K G S N A N S F A V L V A Y V N G D G E I G R I E L K Q A L AtEXPB2

107 D Q L R A A G V L Q I Q Y N R V P C N W G G V K L T F V V D V G S N P N Y F A V L V K Y E N G D G D L S G V E L M Q T G OsEXPB15  
107 G Q L Q N R G E I S V V Y R R T A C K Y G G K N I A F H V N E G S T T F W L S L L V E F E D G D G D I G S M Q L K Q A N OsEXPB16  
106 G E L R N I G L Y D I Q Y K R V P C E Y P N Q N I A F K V D A G S S K Y W F S F T V K Y L G G P G D I N T V E V K C G K PpEXPB1  
111 G Q L R N R G L Y N L L Y K R V P C R Y R G T N I E F R V D N G S S P F W L S I L I K Y V G G P G D I G Q V Y I R M A N PpEXPB2  
110 G Q L R N R G L Y N L L Y K R V P C R Y R G T N I Q F R V D K G S S A Y W L S I L I K Y V G G P G D I G Q V Y I K M A N PpEXPB6  
106 G A L R N I G L Y D I Q Y K R V P C E Y P G Q N I V F K V D A G S S P F W L S F T V K Y M G G P G D I E S V S I S Q - R PpEXPB4  
106 G E L R N I G L Y D I L Y K R V P C E Y P N Q N I A F Q V D A G S S A F W L S L L V K Y M G G P G D I E S V E I R T T G PpEXPB5  
106 Q E L R N L G L Y E I Q Y R R V P C Y Y P N Q N V A F K V D P G S T P F W L S F T I E Y Q G G P G D I E S V A I R Q A G PpEXPB3  
111 - Q Y R - A G I V P V A Y R R V P C V R R G - G I R F T I N - - G H S Y F N L V L I T N V G G A G D V H S A M V K G S R AtEXPA1

```

-----+-----+-----+-----+-----+-----+
                190                200                210                220                230                240
-----+-----+-----+-----+-----+-----+
165 - A R E W L E M K H V W G A N W C I I - - G G - P L K G - P F S I K L T T L S A G K T L S A T D V V P R N W A P K A T Y AtEXPB3
165 D S D K W L S M S Q S W G A V W K L D - - V S S P L R A - P L S L R V T S L E S G K T V V A S N V I P A N W Q P G A I Y AtEXPB2
167 A G A A W T Q M Q Q S W G A V W K L N - - A G S A L Q A - P F S I R L T S S - S G K T L V A S N V I P S G W K P G M S Y OsEXPB15
167 - S A Q W Q D M K H I W G A T W S L T - - P G - P L V G - P F S V R L T T L T T R Q T L S A Q D V I P K N W T P K A T Y OsEXPB16
166 - N G Y F Q Y A Q H S W G A N W M L I N Y S G V P F Q F - P L T I K I T T K L N D H T V V A E D V I P D W F G P G V Q Y PpEXPB1
171 - W Y K F Q P M R H A W G A N W M I P N Y D G K P F R G - P M D I R I V S R L N R H T V L A R G V I P A Y F R P G T S Y PpEXPB2
170 - W F A F Q P M K H A W G A N W M M P S Y D G K P F K G - P M D I K I V S K L N R H S V V A R G V I P G Y F R P G T T Y PpEXPB6
165 - D G S F I P A Q H S W G A N W M L I N Y S G A P F Q G - P Y S V K I N C M L N G H T V V A K D V I P A G F A P G Q E Y PpEXPB4
166 - S S S F Q P A K H N W G A S W M L I N T S G Q P F K G - P Y D V K I V S K L N G H T V I A E K A I P E F F E P G K L Y PpEXPB5
166 - S S E F Q Q M Q H N W G A N Y M L I C Y S G K P F K G - P Y D V M I T A K L N G H V L I A Q D A I P E Y F Q P G G I Y PpEXPB3
166 - - T G W Q A M S R N W G Q N W Q S N - - S - - Y L N G Q S L S F K V T T S - D G Q T I V S N N V A N A G W S F G Q T F AtEXPA1

```

```

-----
-----
220 S S R L N F AtEXPB3
222 K S N V N F AtEXPB2

```

223 I S T V N F

OsEXPB15

222 T S R L N F

OsEXPB16

224 E S N V Q I

PpEXPB1

229 R S R V Q M

PpEXPB2

228 N S R V Q M

PpEXPB6

223 E S N V Q I

PpEXPB4

224 E S N V Q M

PpEXPB5

224 E S N V Q L

PpEXPB3

219 T G - A Q L

AtEXPA1
